# Supplementary material for: An integrated network analysis approach to identify potential key genes, transcription factors, and microRNAs regulating human hematopoietic stem cell aging
Source: Royal Society of Chemistry journal article supplement (doi:10.1039/d1mo00199j), 2021-09-24
Supplement: d1mo00199j1.pdf [file d1mo00199j1.pdf]

## Supplementary Data

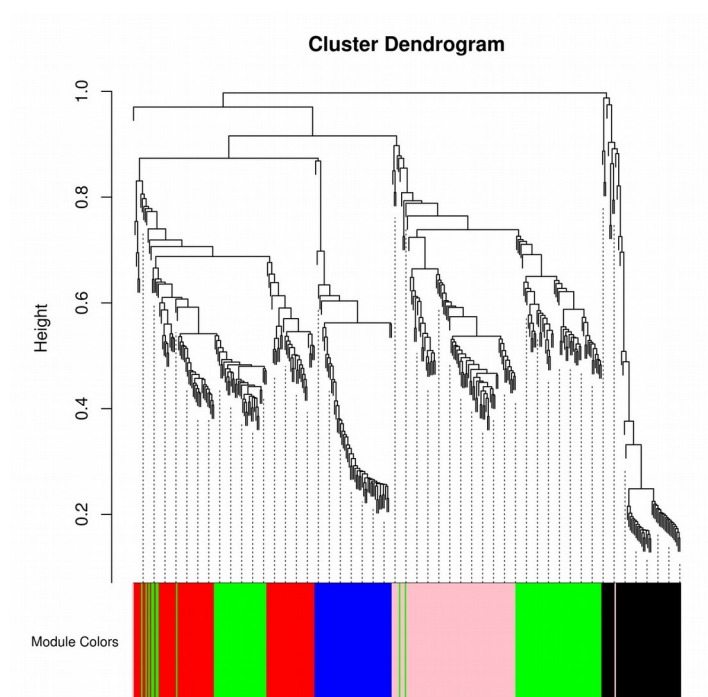

**Figure S1. Hierarchical clustering of co-expression network.** Gene dendrogram constructed by average linkage hierarchical clustering (upper panel), while the color-coded row underneath the cluster tree (lower panel) indicating module assignment

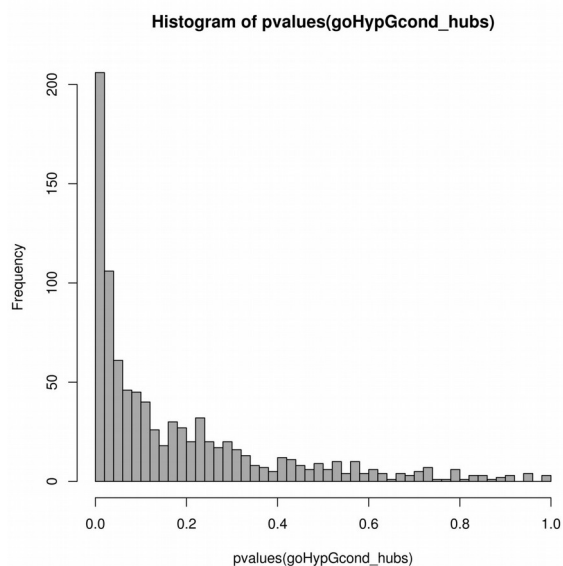

**Figure S2. Over-representation analysis of gene ontology terms.** Histogram of p-values for over-representation of genes in all gene ontology terms

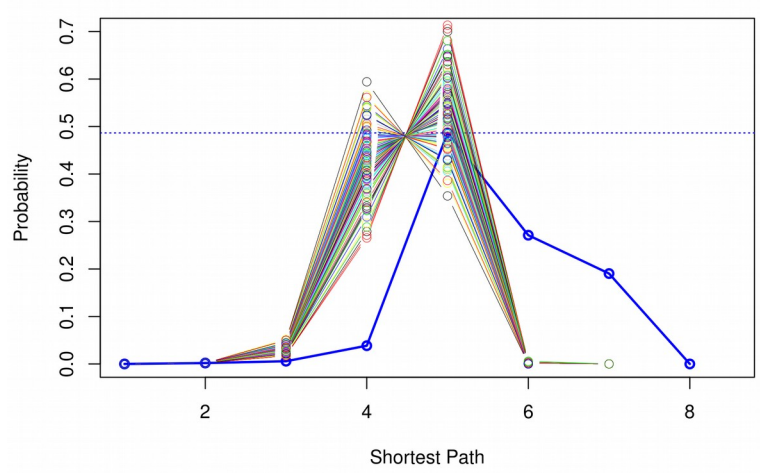

**Figure S3.** Comparison between shortest path (sp) length distributions of native networks (blue color) and their corresponding random networks (multiple-colors).
