# Supplementary material for: An integrated network analysis approach to identify potential key genes, transcription factors, and microRNAs regulating human hematopoietic stem cell aging
Source: Royal Society of Chemistry journal article supplement (doi:10.1039/d1mo00199j), 2021-09-24
Supplement: d1mo00199j2.zip [file d1mo00199j2.zip]

## Sheet: Table S1
Table S1. Human homologs in mouse
Mouse Gene	Ref Protein	Human Gene	Ref Protein
Brca2	NP_033895	BRCA2	NP_000050
Col3a1	NP_034060	COL3A1	NP_000081
Col5a1	NP_056549	COL5A1	NP_000084
Fxn	NP_032070	FXN	NP_000135
Lyz1	NP_038618	LYZ	NP_000230
Ncf1	NP_035006	NCF1	NP_000256
Rhag	NP_035399	RHAG	NP_000315
Slc4a1	NP_035533	SLC4A1	NP_000333
Cybb	NP_031833	CYBB	NP_000388
Stk11	NP_035622	STK11	NP_000446
Ugt1a1	NP_964007	UGT1A1	NP_000454
C1qb	NP_033907	C1QB	NP_000482
Epx	NP_031972	EPX	NP_000493
Gstm2	NP_032209	GSTM1	NP_000552
Ncf4	NP_032703	NCF4	NP_000622
Sell	NP_035476	SELL	NP_000646
Ahcy	NP_057870	AHCY	NP_000678
Ptgs2	NP_035328	PTGS2	NP_000954
Ubash3a	NP_808491	UBASH3A	NP_001001895
Anxa2	NP_031611	ANXA2	NP_001002858
Optn	NP_862896	OPTN	NP_001008212
Steap3	NP_573449	STEAP3	NP_001008410
Katnal1	NP_705800	KATNAL1	NP_001014402
Slx1b	NP_083696	SLX1A	NP_001014999
Lrrc66	NP_705796	LRRC66	NP_001019782
Sptb	NP_038703	SPTB	NP_001020029
Arhgap30	NP_001005508	ARHGAP30	NP_001020769
Rgs7bp	NP_084155	RGS7BP	NP_001025046
Atf3	NP_031524	ATF3	NP_001025458
Maf	NP_001020748	MAF	NP_001026974
Spint1	NP_058603	SPINT1	NP_001027539
Tacr1	NP_033339	TACR1	NP_001049
Trf	NP_598738	TF	NP_001054
Vcam1	NP_035823	VCAM1	NP_001069
Nxpe4	NP_766509	NXPE4	NP_001071107
Rassf10	NP_780488	RASSF10	NP_001073990
AU019823	NP_997614	NKAPD1	NP_001076438
Srl	NP_780556	SRL	NP_001092284
Ptma	NP_032998	PTMA	NP_001092755
Cenpn	NP_082407	CENPN	NP_001094094
Gm15800	NP_852086	HECTD4	NP_001103132
Lrrc75a	NP_942561	LRRC75A	NP_001107039
Epb4.2	NP_038541	EPB42	NP_001107606
Bex6	NP_001028711	BEX4	NP_001121160
Car1	NP_033929	CA1	NP_001122302
Trpc2	NP_001103367	TRPC3	NP_001124170
Plac8	NP_631937	PLAC8	NP_001124188
Cldn5	NP_038833	CLDN5	NP_001124333
Aldh3a1	NP_031462	ALDH3A1	NP_001128640
Agfg1	NP_034602	AGFG1	NP_001128660
Alox15	NP_033790	ALOX15	NP_001131
Abcg4	NP_620405	ABCG4	NP_001135977
Alkbh2	NP_778181	ALKBH2	NP_001138847
Scrn1	NP_081544	SCRN1	NP_001138986
Ptgr1	NP_080244	PTGR1	NP_001139580
Kdm3a	NP_766589	KDM3A	NP_001140160
Prob1	NP_001257575	PROB1	NP_001155018
Birc5	NP_033819	BIRC5	NP_001159
Chd8	NP_963999	CHD8	NP_001164100
BC030867	NP_705772	C17orf53	NP_001164722
Sh2d4a	NP_082458	SH2D4A	NP_001167630
Gm21992	NP_001277057	RBM14-RBM4	NP_001185774
Abcc10	NP_733780	ABCC10	NP_001185863
Ptpn7	NP_796055	PTPN7	NP_001186726
4930486L24Rik	NP_835199	CTSV	NP_001188504
Rbm10	NP_663602	RBM10	NP_001191397
Clec12a	NP_808354	CLEC12A	NP_001193939
Shisa8	NP_001193950	SHISA8	NP_001193949
Casp12	NP_033938	CASP4	NP_001216
Gda	NP_034396	GDA	NP_001229434
Tex264	NP_035703	TEX264	NP_001230654
Ccnt1	NP_033963	CCNT1	NP_001231
Pask	NP_543126	PASK	NP_001239049
Ssbp1	NP_997633	SSBP1	NP_001243440
Prdm11	NP_001171007	PRDM11	NP_001243625
Samd14	NP_666137	SAMD14	NP_001244288
Layn	NP_001028706	LAYN	NP_001245319
Cdc20	NP_075712	CDC20	NP_001246
Cdk9	NP_570930	CDK9	NP_001252
Kif18b	NP_932063	KIF18B	NP_001252506
Cdkn2c	NP_031697	CDKN2C	NP_001253
Sorbs2	NP_766340	SORBS2	NP_001257700
Gm684	NP_001182610	COLCA2	NP_001258387
Pole3	NP_067473	POLE3	NP_001265184
Gapvd1	NP_079985	GAPVD1	NP_001269610
Aurkb	NP_035626	AURKB	NP_001271455
Scaf8	NP_598884	SCAF8	NP_001273117
Hells	NP_032260	HELLS	NP_001275996
Mms19	NP_082428	MMS19	NP_001276334
Il12rb1	NP_032379	IL12RB1	NP_001276952
Rel	NP_033070	REL	NP_001278675
Inpp5b	NP_032411	INPP5B	NP_001284363
2810004N23Rik	NP_079891	C1orf131	NP_001287759
Prg2	NP_032946	PRG2	NP_001289855
Zfp90	NP_035894	ZFP90	NP_001292132
Ticrr	NP_084111	TICRR	NP_001294954
Stap1	NP_064376	STAP1	NP_001304698
S100a8	NP_038678	S100A8	NP_001306127
Ccdc130	NP_080626	CCDC130	NP_001307494
Adcy3	NP_612178	ADCY3	NP_001307542
Arhgef7	NP_059098	ARHGEF7	NP_001307782
Dmtn	NP_038542	DMTN	NP_001310313
Srek1	NP_766180	SREK1	NP_001310458
Dync2h1	NP_084127	DYNC2H1	NP_001368
Igfbp4	NP_034647	IGFBP4	NP_001543
Irak2	NP_751893	IRAK2	NP_001561
Alcam	NP_033785	ALCAM	NP_001618
Clec10a	NP_034926	ASGR1	NP_001662
Atp1b2	NP_038201	ATP1B2	NP_001669
Cd38	NP_031672	CD38	NP_001766
Cd48	NP_031675	CD48	NP_001769
Cd69	NP_001028294	CD69	NP_001772
Cdc25a	NP_031684	CDC25A	NP_001780
Cdh11	NP_033996	CDH11	NP_001788
Col4a2	NP_034062	COL4A2	NP_001837
Csnk2a2	NP_034104	CSNK2A2	NP_001887
Ctse	NP_031825	CTSE	NP_001901
Dcn	NP_031859	DCN	NP_001911
Dsg2	NP_031909	DSG2	NP_001934
Egr1	NP_031939	EGR1	NP_001955
Elane	NP_056594	ELANE	NP_001963
Fcnb	NP_034320	FCN1	NP_001994
Gata1	NP_032115	GATA1	NP_002040
Gypa	NP_034499	GYPA	NP_002090
Hmox1	NP_034572	HMOX1	NP_002124
Itga2	NP_032422	ITGA2	NP_002194
Jun	NP_034721	JUN	NP_002219
Junb	NP_032442	JUNB	NP_002220
Klrb1b	NP_085102	KLRB1	NP_002249
Kifc1	NP_001182227	KIFC1	NP_002254
Lgals1	NP_032521	LGALS1	NP_002296
Ltf	NP_032548	LTF	NP_002334
Mrc1	NP_032651	MRC1	NP_002429
Nek2	NP_035022	NEK2	NP_002488
Cfp	NP_032849	CFP	NP_002612
Pole2	NP_035263	POLE2	NP_002683
Psma3	NP_035314	PSMA3	NP_002779
Psmd13	NP_036005	PSMD13	NP_002808
Rbl1	NP_035379	RBL1	NP_002886
Rcvrn	NP_033064	RCVRN	NP_002894
Rgs1	NP_056626	RGS1	NP_002913
Rgs2	NP_033087	RGS2	NP_002914
Ear6	NP_444341	RNASE2	NP_002925
Sbf1	NP_001164032	SBF1	NP_002963
Fscn1	NP_032010	FSCN1	NP_003079
Sparc	NP_033268	SPARC	NP_003109
Tufm	NP_766333	TUFM	NP_003312
Zfp36	NP_035886	ZFP36	NP_003398
Bsn	NP_031593	BSN	NP_003449
Axin1	NP_033863	AXIN1	NP_003493
Fam193a	NP_001230052	FAM193A	NP_003695
Oasl2	NP_035984	OASL	NP_003724
Eif3j1	NP_653128	EIF3J	NP_003749
Snx4	NP_542124	SNX4	NP_003785
Adam1a	NP_742124	ADAM9	NP_003807
Siglecf	NP_663556	SIGLEC5	NP_003821
Dlk1	NP_034182	DLK1	NP_003827
Asap2	NP_001128664	ASAP2	NP_003878
Ldb1	NP_034827	LDB1	NP_003884
Rhob	NP_031509	RHOB	NP_004031
Bysl	NP_058555	BYSL	NP_004044
Flt3	NP_034359	FLT3	NP_004110
Orc1	NP_035145	ORC1	NP_004144
Recql5	NP_569721	RECQL5	NP_004250
Camp	NP_034051	CAMP	NP_004336
Dusp1	NP_038670	DUSP1	NP_004408
Kif11	NP_034745	KIF11	NP_004514
Mmp2	NP_032636	MMP2	NP_004521
Top3a	NP_033436	TOP3A	NP_004609
Rrp9	NP_663595	RRP9	NP_004695
Ap4m1	NP_067367	AP4M1	NP_004713
Kcnb2	NP_001091998	KCNB2	NP_004761
Arhgap29	NP_766113	ARHGAP29	NP_004806
Agtr1a	NP_796296	AGTR1	NP_004826
Gmfg	NP_071307	GMFG	NP_004868
Ier2	NP_034629	IER2	NP_004898
Gpr183	NP_898852	GPR183	NP_004942
Mmp9	NP_038627	MMP9	NP_004985
Ndufab1	NP_082453	NDUFAB1	NP_004994
Serpinb10	NP_932145	SERPINB10	NP_005015
Rbbp5	NP_766105	RBBP5	NP_005048
Thrap3	NP_666265	THRAP3	NP_005110
Fos	NP_034364	FOS	NP_005243
Hist1h1c	NP_056601	HIST1H1C	NP_005310
Hspa1a	NP_034609	HSPA1B	NP_005337
Papss1	NP_035993	PAPSS1	NP_005434
Scarb1	NP_058021	SCARB1	NP_005496
Lcn2	NP_032517	LCN2	NP_005555
Cd180	NP_032559	CD180	NP_005573
Nkg7	NP_077215	NKG7	NP_005592
Ramp2	NP_062317	RAMP2	NP_005845
Mc5r	NP_038624	MC5R	NP_005904
Mtf1	NP_032662	MTF1	NP_005946
Myh10	NP_780469	MYH10	NP_005955
Vps72	NP_033362	VPS72	NP_005988
Alkbh1	NP_001096035	ALKBH1	NP_006011
Prg3	NP_058610	PRG3	NP_006084
Tubgcp3	NP_932148	TUBGCP3	NP_006313
Appbp2	NP_080101	APPBP2	NP_006371
Mab21l2	NP_035969	MAB21L2	NP_006430
Mxd4	NP_034883	MXD4	NP_006445
Arid3b	NP_062663	ARID3B	NP_006456
Trim16	NP_444399	TRIM16	NP_006461
Klf1	NP_034765	KLF1	NP_006554
Sntb2	NP_033255	SNTB2	NP_006741
Btg2	NP_031596	BTG2	NP_006754
Trim10	NP_035410	TRIM10	NP_006769
Sf3a3	NP_083433	SF3A3	NP_006793
Ube2c	NP_081061	UBE2C	NP_008950
Wdhd1	NP_766186	WDHD1	NP_009017
Brca1	NP_033894	BRCA1	NP_009225
Kif22	NP_663563	KIF22	NP_015556
Casc3	NP_619601	CASC3	NP_031385
Rfc5	NP_082404	RFC5	NP_031396
Frat2	NP_808271	FRAT2	NP_036215
Ints6	NP_032741	INTS6	NP_036273
Haao	NP_079601	HAAO	NP_036337
Kin	NP_079556	KIN	NP_036443
Nupr1	NP_062712	NUPR1	NP_036517
Uck2	NP_109649	UCK2	NP_036606
Fhod1	NP_808367	FHOD1	NP_037373
Prss50	NP_666339	PRSS50	NP_037402
Hcfc2	NP_001074687	HCFC2	NP_037452
Uqcr10	NP_932096	UQCR10	NP_037519
Pilrb1	NP_573472	PILRA	NP_038467
Smarcal1	NP_061287	SMARCAL1	NP_054859
Impa2	NP_444491	IMPA2	NP_055029
Tm4sf1	NP_032562	TM4SF1	NP_055035
Brd4	NP_932762	BRD4	NP_055114
Chmp2a	NP_081161	CHMP2A	NP_055268
Utp20	NP_780367	UTP20	NP_055318
Cnot3	NP_666288	CNOT3	NP_055331
Ehd3	NP_065603	EHD3	NP_055415
Safb2	NP_001025150	SAFB2	NP_055464
Tatdn2	NP_001028635	TATDN2	NP_055575
Kdm4b	NP_742144	KDM4B	NP_055830
Dnmbp	NP_082305	DNMBP	NP_056036
Clec16a	NP_808230	CLEC16A	NP_056041
Icosl	NP_056605	ICOSLG	NP_056074
Ice1	NP_659086	ICE1	NP_056140
Med13l	NP_766012	MED13L	NP_056150
Ncaph	NP_659067	NCAPH	NP_056156
Zfyve26	NP_001008550	ZFYVE26	NP_056161
Cnrip1	NP_084137	CNRIP1	NP_056278
Crlf3	NP_061246	CRLF3	NP_057070
Mecr	NP_079573	MECR	NP_057095
Fahd2a	NP_083905	FAHD2A	NP_057128
Lsm7	NP_079625	LSM7	NP_057283
Klf2	NP_032478	KLF2	NP_057354
Taco1	NP_081622	TACO1	NP_057444
Mrpl37	NP_079776	MRPL37	NP_057575
Fam53c	NP_780313	FAM53C	NP_057689
Gipc2	NP_058563	GIPC2	NP_060125
Paqr5	NP_083024	PAQR5	NP_060175
Fam46c	NP_001136424	FAM46C	NP_060179
Casz1	NP_081471	CASZ1	NP_060236
Slc25a38	NP_659042	SLC25A38	NP_060345
Pex26	NP_083006	PEX26	NP_060399
Smpd4	NP_084221	SMPD4	NP_060421
Arglu1	NP_789819	ARGLU1	NP_060481
Ndc1	NP_082631	NDC1	NP_060557
Nle1	NP_663406	NLE1	NP_060566
Cdca8	NP_080836	CDCA8	NP_060571
Asun	NP_620096	INTS13	NP_060634
Sept11	NP_001009818	SEPT11	NP_060713
Neil3	NP_666320	NEIL3	NP_060718
Pcmtd2	NP_705822	PCMTD2	NP_060727
Phf10	NP_077212	PHF10	NP_060758
Zfp839	NP_082641	ZNF839	NP_060805
Depdc1b	NP_848798	DEPDC1B	NP_060839
Wnk1	NP_941992	WNK1	NP_061852
Ssh1	NP_932777	SSH1	NP_061857
Fam64a	NP_653109	PIMREG	NP_061886
Susd2	NP_082166	SUSD2	NP_062547
Ppan	NP_663585	PPAN	NP_064615
Kif15	NP_034750	KIF15	NP_064627
Man1c1	NP_997120	MAN1C1	NP_065112
Cd177	NP_081138	CD177	NP_065139
Atp8b5	NP_796169	ATP8B2	NP_065185
Osm	NP_001013383	OSM	NP_065391
Ripk4	NP_076152	RIPK4	NP_065690
Cbx8	NP_038954	CBX8	NP_065700
Rab22a	NP_077756	RAB22A	NP_065724
Prr12	NP_778187	PRR12	NP_065770
Zfp317	NP_766506	ZNF317	NP_065984
Ano8	NP_001158151	ANO8	NP_066010
Rnasel	NP_036012	RNASEL	NP_066956
Cotl1	NP_082347	COTL1	NP_066972
Inip	NP_001013595	INIP	NP_067041
Jam2	NP_076333	JAM2	NP_067042
Ntn4	NP_067295	NTN4	NP_067052
Kcnk12	NP_954859	KCNK12	NP_071338
Rnf123	NP_115932	RNF123	NP_071347
Thada	NP_898842	THADA	NP_071348
Zfp335	NP_950192	ZNF335	NP_071378
Xylt2	NP_665827	XYLT2	NP_071450
Vps52	NP_766208	VPS52	NP_072047
Gigyf1	NP_113596	GIGYF1	NP_072096
Cep85	NP_653110	CEP85	NP_073615
Tm6sf1	NP_663350	TM6SF1	NP_075379
Marcksl1	NP_034937	MARCKSL1	NP_075385
Upf3b	NP_080849	UPF3B	NP_075386
Hoxb9	NP_032296	HOXB9	NP_076922
Alg8	NP_950200	ALG8	NP_076984
Scrn3	NP_083298	SCRN3	NP_078859
1700109H08Rik	NP_084119	EFCAB1	NP_078869
Zcchc6	NP_705766	ZCCHC6	NP_078893
Sap30l	NP_001074637	SAP30L	NP_078908
Ccdc134	NP_766016	CCDC134	NP_079097
Dennd1c	NP_705779	DENND1C	NP_079174
Sik3	NP_081774	SIK3	NP_079440
Plxna2	NP_032908	PLXNA2	NP_079455
Ccdc34	NP_080889	CCDC34	NP_110398
Wbscr16	NP_291050	RCC1L	NP_110425
Fam117a	NP_766131	FAM117A	NP_110429
Cdt1	NP_080290	CDT1	NP_112190
Cdca3	NP_038566	CDCA3	NP_112589
Tmem47	NP_620090	TMEM47	NP_113630
Syt15	NP_852682	SYT15	NP_114118
Rsph3a	NP_080065	RSPH3	NP_114130
Rassf4	NP_835146	RASSF4	NP_114412
Mnd1	NP_084073	MND1	NP_115493
Fam161a	NP_082948	FAM161A	NP_115556
Tmem117	NP_848904	TMEM117	NP_115632
Mrpl45	NP_080203	MRPL45	NP_115727
Zfp512	NP_766581	ZNF512	NP_115810
Gtpbp3	NP_115933	GTPBP3	NP_116009
Arhgef39	NP_001013395	ARHGEF39	NP_116207
Alkbh6	NP_932144	ALKBH6	NP_116267
Arhgap19	NP_081943	ARHGAP19	NP_116289
Nlrp1a	NP_001004142	NLRP1	NP_127499
Cdk11b	NP_031687	CDK11B	NP_277021
Slc38a5	NP_766067	SLC38A5	NP_277053
Clnk	NP_038776	CLNK	NP_443196
Rgs3	NP_599018	RGS3	NP_570613
Ccbe1	NP_848908	CCBE1	NP_597716
Synpo2	NP_536699	SYNPO2	NP_597734
Rad51b	NP_033040	RAD51B	NP_598194
Ap5b1	NP_001028620	AP5B1	NP_612377
Mtg1	NP_955005	MTG1	NP_612393
Ccdc167	NP_081058	CCDC167	NP_612502
Gga3	NP_766636	GGA3	NP_619525
Son	NP_849211	SON	NP_620305
Fam175a	NP_765993	ABRAXAS1	NP_620775
Mtfmt	NP_081410	MTFMT	NP_640335
Ankrd23	NP_705722	ANKRD23	NP_659431
Ddias	NP_001074464	DDIAS	NP_659455
Sft2d1	NP_598875	SFT2D1	NP_660152
Trim11	NP_444398	TRIM11	NP_660215
Fam110b	NP_775602	FAM110B	NP_671722
Spic	NP_035591	SPIC	NP_689536
Rasef	NP_001017427	RASEF	NP_689786
Zfp3	NP_808233	ZFP3	NP_694563
Sbspon	NP_001028460	SBSPON	NP_694957
Sh2d3c	NP_038809	SH2D3C	NP_733745
Klhdc8b	NP_084351	KLHDC8B	NP_775817
Pdzd8	NP_001028394	PDZD8	NP_776152
Cd300lb	NP_954691	CD300LB	NP_777552
Adrm1	NP_062796	ADRM1	NP_783163
Cd86	NP_062261	CD86	NP_787058
Nlrp10	NP_780741	NLRP10	NP_789791
Nek8	NP_543125	NEK8	NP_835464
Gcc2	NP_081651	GCC2	NP_852118
Aasdh	NP_776126	AASDH	NP_861522
Spc24	NP_080558	SPC24	NP_872319
Nsun6	NP_083226	NSUN6	NP_872349
Snx20	NP_082116	SNX20	NP_878274
2410004B18Rik	NP_079831	C1orf52	NP_932343
Klhl17	NP_938047	KLHL17	NP_938073
Galnt10	NP_598950	GALNT10	NP_938080
Nrk	NP_038752	NRK	NP_940867
Polq	NP_084253	POLQ	NP_955452
Chil3	NP_034022	CHIA	NP_970615
Fam151b	NP_001157099	FAM151B	NP_991111
Lst1	NP_034864	LST1	NP_995311
Tmem215	NP_796149	TMEM215	NP_997723

## Sheet: Table S2
Table S2. Significantly enriched gene ontology biological process terms in candidate modules
GO-BP Term	GO-BP ID	Pvalue	Genes annotated
BLACK
regulation of mononuclear cell proliferation	GO:0032944	0.0169576	CD38, GPR183, TACR1
regulation of lymphocyte proliferation	GO:0050670	0.0167191	CD38, GPR183, TACR1
regulation of leukocyte proliferation	GO:0070663	0.018681	CD38, GPR183, TACR1
positive regulation of mononuclear cell proliferation	GO:0032946	0.00440475	CD38, GPR183, TACR1
positive regulation of lymphocyte proliferation	GO:0050671	0.00429752	CD38, GPR183, TACR1
positive regulation of lymphocyte activation	GO:0051251	0.0340879	CD38, GPR183, TACR1
positive regulation of leukocyte proliferation	GO:0070665	0.0048499	CD38, GPR183, TACR1
positive regulation of leukocyte activation	GO:0002696	0.0434575	CD38, GPR183, TACR1
positive regulation of cell activation	GO:0050867	0.0471165	CD38, GPR183, TACR1
lymphocyte proliferation	GO:0046651	0.0373251	CD38, GPR183, TACR1
leukocyte proliferation	GO:0070661	0.0426647	CD38, GPR183, TACR1
G1/S transition of mitotic cell cycle	GO:0000082	0.0351498	CDKN2C, POLE2, PSMD13
cell cycle G1/S phase transition	GO:0044843	0.0384383	CDKN2C, POLE2, PSMD13
GREEN
regulation of transcription involved in G1/S transition of mitotic cell cycle	GO:0000083	0.000486154	BRD4, CDT1, ORC1
regulation of mitotic nuclear division	GO:0007088	0.0484655	CDC20, CSNK2A2, KIF11
regulation of mitotic cell cycle phase transition	GO:1901990	0.017815	BRD4, CDC20, CSNK2A2, RAD51B, TICRR
regulation of mitotic cell cycle	GO:0007346	0.00570562	BRCA2, BRD4, CDC20, CSNK2A2, KIF11, NRK, RAD51B, TICRR
regulation of G2/M transition of mitotic cell cycle	GO:0010389	0.00313335	BRD4, RAD51B, TICRR
regulation of cell shape	GO:0008360	0.0443771	DMTN, EPB42, MYH10
regulation of cell division	GO:0051302	0.007896	BRCA2, CDC20, CSNK2A2, KIF11, KIF18B, SUSD2
regulation of cell cycle process	GO:0010564	6.03753e-05	BRCA1, BRCA2, BRD4, CDC20, CDT1, CRLF3, CSNK2A2, KIF11, ORC1, RAD51B, SUSD2, TICRR
regulation of cell cycle phase transition	GO:1901987	0.00590779	BRD4, CDC20, CSNK2A2, RAD51B, SUSD2, TICRR
regulation of cell cycle G2/M phase transition	GO:1902749	0.00388263	BRD4, RAD51B, TICRR
regulation of cell cycle	GO:0051726	0.00102135	BRCA1, BRCA2, BRD4, CDC20, CDT1, CRLF3, CSNK2A2, DDIAS, KIF11, NRK, ORC1, RAD51B, SUSD2, TICRR
positive regulation of mitotic cell cycle	GO:0045931	0.029861	BRCA2, BRD4, RAD51B
positive regulation of cell cycle process	GO:0090068	0.0134985	BRCA1, BRD4, CRLF3, ORC1, RAD51B
positive regulation of cell cycle	GO:0045787	0.00946492	BRCA1, BRCA2, BRD4, CRLF3, ORC1, RAD51B
negative regulation of cell division	GO:0051782	0.0121177	CDC20, CSNK2A2, SUSD2
negative regulation of cell cycle process	GO:0010948	0.00306244	BRCA1, BRD4, CDC20, CSNK2A2, SUSD2, TICRR
negative regulation of cell cycle phase transition	GO:1901988	0.0200853	CDC20, CSNK2A2, SUSD2, TICRR
negative regulation of cell cycle	GO:0045786	0.00726946	BRCA1, BRD4, CDC20, CRLF3, CSNK2A2, DDIAS, SUSD2, TICRR
myeloid cell homeostasis	GO:0002262	0.000766808	DMTN, EPB42, RHAG, SLC25A38, TRIM10
myeloid cell differentiation	GO:0030099	0.0447824	DMTN, EPB42, RHAG, SLC25A38, TRIM10
myeloid cell development	GO:0061515	0.00331147	DMTN, EPB42, RHAG
mitotic cell cycle process	GO:1903047	2.44673e-07	BRD4, CDC20, CDCA3, CDCA8, CDT1, CRLF3, CSNK2A2, KIF11, KIF15, KIF18B, KIF22, KIFC1, MYH10, OPTN, ORC1, RAD51B, RECQL5, SPC24, TICRR
mitotic cell cycle phase transition	GO:0044772	0.00140818	BRD4, CDC20, CDT1, CRLF3, CSNK2A2, OPTN, ORC1, RAD51B, TICRR
mitotic cell cycle	GO:0000278	4.34246e-08	BRCA2, BRD4, CDC20, CDCA3, CDCA8, CDT1, CENPN, CRLF3, CSNK2A2, KIF11, KIF15, KIF18B, KIF22, KIFC1, MYH10, NRK, OPTN, ORC1, RAD51B, RECQL5, SPC24, TICRR
meiotic cell cycle process	GO:1903046	0.0026191	ADCY3, BRCA2, CDC20, RAD51B, TOP3A
meiotic cell cycle	GO:0051321	0.00617345	ADCY3, BRCA2, CDC20, RAD51B, TOP3A
G2/M transition of mitotic cell cycle	GO:0000086	0.0227331	BRD4, OPTN, RAD51B, TICRR
erythrocyte homeostasis	GO:0034101	0.000360938	DMTN, EPB42, RHAG, SLC25A38, TRIM10
erythrocyte differentiation	GO:0030218	0.000262908	DMTN, EPB42, RHAG, SLC25A38, TRIM10
erythrocyte development	GO:0048821	0.000385469	DMTN, EPB42, RHAG
cell cycle process	GO:0022402	3.88129e-08	ADCY3, BRCA1, BRCA2, BRD4, CDC20, CDCA3, CDCA8, CDT1, CRLF3, CSNK2A2, DDIAS, KIF11, KIF15, KIF18B, KIF22, KIFC1, MYH10, OPTN, ORC1, RAD51B, RECQL5, SPC24, SUSD2, TICRR, TOP3A
cell cycle phase transition	GO:0044770	0.000497544	BRD4, CDC20, CDT1, CRLF3, CSNK2A2, OPTN, ORC1, RAD51B, SUSD2, TICRR
cell cycle G2/M phase transition	GO:0044839	0.0243374	BRD4, OPTN, RAD51B, TICRR
cell cycle G1/S phase transition	GO:0044843	0.0162867	BRD4, CDT1, CRLF3, ORC1, SUSD2
cell cycle checkpoint	GO:0000075	0.00300201	BRCA1, BRD4, CDC20, CDT1, CSNK2A2, TICRR
RED
regulation of leukocyte proliferation	GO:0070663	0.0491193	CD86, LST1, VCAM1
cell-matrix adhesion	GO:0007160	0.0491193	COL3A1, ITGA2, VCAM1
cell cycle G2/M phase transition	GO:0044839	0.04728	BIRC5, CDC25A, NEK2
regulation of hemopoiesis	GO:1903706	0.044903	CD86, FLT3, GATA1, LTF
regulation of mononuclear cell proliferation	GO:0032944	0.0448822	CD86, LST1, VCAM1
myeloid leukocyte differentiation	GO:0002573	0.0448822	CD86, GATA1, LTF
G2/M transition of mitotic cell cycle	GO:0000086	0.0448822	BIRC5, CDC25A, NEK2
regulation of lymphocyte proliferation	GO:0050670	0.0442926	CD86, LST1, VCAM1
negative regulation of cell migration	GO:0030336	0.0442926	COL3A1, HMOX1, STAP1
leukocyte differentiation	GO:0002521	0.0427792	CD86, FLT3, GATA1, LTF, VCAM1
regulation of cell proliferation	GO:0042127	0.0418244	BIRC5, CD86, FLT3, GATA1, HMOX1, LST1, LTF, MARCKSL1, OSM, SPARC, VCAM1
negative regulation of cell activation	GO:0050866	0.0303654	FLT3, HMOX1, LST1
mitotic cell cycle process	GO:1903047	0.0251031	AURKB, BIRC5, CDC25A, DUSP1, HELLS, NCAPH, NEK2, UBE2C
myeloid leukocyte activation	GO:0002274	0.0248655	CD86, HMOX1, STAP1
negative regulation of leukocyte activation	GO:0002695	0.0227489	FLT3, HMOX1, LST1
cell cycle checkpoint	GO:0000075	0.0206617	AURKB, BIRC5, DUSP1, UBE2C
cell cycle process	GO:0022402	0.018385	AURKB, BIRC5, CDC25A, CDK9, DUSP1, HELLS, NCAPH, NEK2, OSM, RFC5, UBE2C
regulation of cell cycle	GO:0051726	0.0183262	AURKB, BIRC5, CDC25A, CDK9, DUSP1, NEK2, OSM, RBL1, UBE2C
myeloid cell homeostasis	GO:0002262	0.015982	GATA1, HMOX1, KLF1
homeostasis of number of cells	GO:0048872	0.0145392	FLT3, GATA1, HMOX1, KLF1
regulation of cell activation	GO:0050865	0.012124	CD86, FLT3, HMOX1, LST1, STAP1, VCAM1
endothelial cell proliferation	GO:0001935	0.0113525	HMOX1, SCARB1, SPARC
cell cycle	GO:0007049	0.0107816	AURKB, BIRC5, CDC25A, CDK9, DUSP1, HELLS, NCAPH, NEK2, OSM, RASSF4, RBL1, RFC5, STEAP3, UBE2C
mitotic cell cycle	GO:0000278	0.00966437	AURKB, BIRC5, CDC25A, DUSP1, HELLS, NCAPH, NEK2, RBL1, RFC5, UBE2C
regulation of leukocyte activation	GO:0002694	0.00874192	CD86, FLT3, HMOX1, LST1, STAP1, VCAM1
cell migration	GO:0016477	0.00801612	ATP1B2, COL3A1, COL5A1, DEPDC1B, HMOX1, ITGA2, NLRP10, SCARB1, SPARC, STAP1, VCAM1
regulation of cell cycle process	GO:0010564	0.00773248	AURKB, BIRC5, CDK9, DUSP1, NEK2, OSM, UBE2C
positive regulation of cell proliferation	GO:0008284	0.00620706	BIRC5, CD86, FLT3, GATA1, HMOX1, LTF, MARCKSL1, OSM, VCAM1
cell division	GO:0051301	0.00560135	AURKB, BIRC5, CDC25A, HELLS, NCAPH, NEK2, OSM, UBE2C
leukocyte proliferation	GO:0070661	0.00553284	CD86, FLT3, HELLS, LST1, VCAM1
cell motility	GO:0048870	0.00539351	ATP1B2, COL3A1, COL5A1, DEPDC1B, HMOX1, INPP5B, ITGA2, NLRP10, SCARB1, SPARC, STAP1, VCAM1
mononuclear cell proliferation	GO:0032943	0.00456642	CD86, FLT3, HELLS, LST1, VCAM1
lymphocyte proliferation	GO:0046651	0.00441797	CD86, FLT3, HELLS, LST1, VCAM1
negative regulation of cell cycle process	GO:0010948	0.00399333	AURKB, CDK9, DUSP1, OSM, UBE2C
positive regulation of cell division	GO:0051781	0.00217782	AURKB, BIRC5, OSM, UBE2C
cell proliferation	GO:0008283	0.00180728	BIRC5, CD86, CDC25A, CDK9, FLT3, FRAT2, GATA1, HELLS, HMOX1, IGFBP4, LST1, LTF, MARCKSL1, OSM, SCARB1, SPARC, VCAM1
regulation of cell division	GO:0051302	0.00173738	AURKB, BIRC5, DUSP1, NEK2, OSM, UBE2C
cell activation	GO:0001775	0.0017067	CD86, COL3A1, FLT3, GATA1, HELLS, HMOX1, LST1, SPARC, STAP1, TF, VCAM1
mitotic nuclear division	GO:0007067	0.00161845	AURKB, BIRC5, CDC25A, HELLS, NCAPH, NEK2, UBE2C

## Sheet: Table S3
Table S3. List of genes and module membership (MM) and gene significance (GS) in each of three modules
gene	MM	GS
BLACK
AGTR1	0.986493	0.987262
ALCAM	0.944081	0.945485
ALDH3A1	0.983286	0.982797
ARHGAP29	0.97991	0.980455
CASP4	0.991845	0.993511
CCBE1	0.988978	0.989332
CD38	0.960221	0.959855
CLDN5	0.994225	0.994351
DLK1	0.978006	0.978303
DSG2	0.936078	0.937247
EHD3	0.991758	0.991879
FAM46C	0.948941	0.948046
GDA	0.994794	0.993677
GIPC2	0.958479	0.957992
GPR183	0.993549	0.993895
GSTM1	0.998607	0.999098
HOXB9	0.986699	0.987614
JAM2	0.987931	0.988738
KCNB2	0.989069	0.989875
MAB21L2	0.983052	0.983556
MAF	0.965188	0.969233
NTN4	0.954309	0.954278
NUPR1	0.968729	0.970323
RAMP2	0.985382	0.985879
RASEF	0.97396	0.974183
RASSF10	0.989144	0.986563
RCVRN	0.99573	0.994672
RIPK4	0.988074	0.988963
SBSPON	0.987652	0.988198
SPINT1	0.990088	0.990968
SYT15	0.929455	0.929765
TACR1	0.969469	0.96862
TM4SF1	0.97093	0.970957
TMEM117	0.985361	0.986826
TMEM215	0.98583	0.985496
TMEM47	0.992287	0.990423
GREEN
ABCG4	0.929531	0.883601
ADCY3	0.971642	0.755856
ARHGEF39	0.987547	0.862847
BRCA1	0.981849	0.78266
BRCA2	0.949596	0.721124
BSN	0.922136	0.931876
CDC20	0.929195	0.965875
CDCA3	0.972449	0.863914
CDCA8	0.968782	0.904446
CDT1	0.96516	0.900303
CNOT3	0.947278	0.783878
COL4A2	0.956441	0.920392
CRLF3	0.921362	0.943254
DDIAS	0.9355	0.72639
DMTN	0.910821	0.733872
EPB42	0.935996	0.863104
PIMREG	0.975897	0.867154
COLCA2	0.91899	0.875332
ICOSLG	0.950835	0.72511
IRAK2	0.958716	0.912876
KIF11	0.923649	0.730718
KIF15	0.955538	0.71055
KIF18B	0.972144	0.899445
KIF22	0.969991	0.79166
KIFC1	0.986474	0.859281
KIN	0.95078	0.845558
MC5R	0.94823	0.945677
MXD4	0.940959	0.724753
MYH10	0.966391	0.925141
NRK	0.920973	0.888672
OPTN	0.927555	0.745607
ORC1	0.979481	0.762757
PAQR5	0.934898	0.820602
PASK	0.946298	0.871965
PLXNA2	0.916025	0.925365
POLE3	0.945249	0.768349
PRR12	0.98486	0.817943
PTPN7	0.964465	0.92943
RHAG	0.907926	0.942373
RNASEL	0.987681	0.77443
SEPT11	0.950906	0.70446
SH2D3C	0.925304	0.955306
SHISA8	0.939564	0.911556
SPC24	0.91493	0.960369
SPTB	0.984046	0.864126
TATDN2	0.905083	0.723658
THRAP3	0.969964	0.772891
TICRR	0.954521	0.920152
TOP3A	0.905719	0.736534
TRIM10	0.901611	0.774771
VPS72	0.967535	0.710328
RED
ALG8	0.900071	0.898158
ARHGAP30	0.975933	0.990796
ATP1B2	0.965246	0.933889
ATP8B2	0.992577	0.99729
AURKB	0.935726	0.97189
C17orf53	0.910447	0.913118
BIRC5	0.948529	0.972337
C1QB	0.959689	0.976611
CD86	0.972639	0.946032
CDC25A	0.941361	0.929083
CLNK	0.964151	0.947702
COL3A1	0.926269	0.970743
COL5A1	0.941828	0.937696
CTSE	0.984492	0.991695
DEPDC1B	0.986011	0.986094
DUSP1	0.930085	0.872688
FAM117A	0.990049	0.980477
FLT3	0.981839	0.995591
FRAT2	0.929709	0.866323
GATA1	0.948749	0.914465
GYPA	0.942426	0.956627
HAAO	0.934595	0.873406
HMOX1	0.96326	0.938878
IGFBP4	0.938851	0.925466
INPP5B	0.923869	0.91053
KCNK12	0.96357	0.979413
KLF1	0.921699	0.927313
LTF	0.978706	0.975943
MARCKSL1	0.948014	0.916129
MMP2	0.957519	0.985519
NCAPH	0.966774	0.973069
NEK2	0.974432	0.945612
NLRP10	0.988916	0.981247
PILRA	0.901156	0.864976
PRSS50	0.980526	0.962379
PTGR1	0.91579	0.874377
RASSF4	0.95459	0.91421
RBL1	0.961629	0.935525
REL	0.948523	0.975025
RGS7BP	0.964138	0.987671
SAMD14	0.976202	0.955536
SCARB1	0.91838	0.92244
SLC38A5	0.943279	0.939226
SNTB2	0.91181	0.870936
SPARC	0.986226	0.957451
STEAP3	0.993518	0.989176
SYNPO2	0.95575	0.969872
TM6SF1	0.939686	0.916287
TF	0.965875	0.948924
TRIM16	0.943872	0.899954
UBASH3A	0.957535	0.921887
UBE2C	0.995715	0.989541
UCK2	0.905392	0.925085
VCAM1	0.983039	0.96702

## Sheet: Table S4
Table S4. Specific GO terms/biological roles of candidate genes
BLACK MODULE
Gene	Description	Summary (Genecards)	GO BP terms
AGTR1	Angiotensin II Receptor Type 1	AGTR1 (Angiotensin II Receptor Type 1) is a Protein Coding gene. Diseases associated with AGTR1 include Renal Tubular Dysgenesis and Hypertension, Essential. Among its related pathways are Signaling by GPCR and Calcium signaling pathway.	anatomical structure development (GO:0048856)
			system development (GO:0048731)
			cell growth (GO:0016049)
			regulation of system process (GO:0044057)
			circulatory system process (GO:0003013)
			blood circulation (GO:0008015)
			signal release (GO:0023061)
			regulation of blood circulation (GO:1903522)
			vascular process in circulatory system (GO:0003018)
			cytosolic calcium ion homeostasis (GO:0051480)
			positive regulation of cytosolic calcium ion concentration (GO:0007204)
			regulation of blood pressure (GO:0008217)
			regulation of tube size (GO:0035150)
			regulation of blood vessel size (GO:0050880)
			vasoconstriction (GO:0042310)
			regulation of vasoconstriction (GO:0019229)
CASP4	Caspase 4	CASP4 (Caspase 4) is a Protein Coding gene. Diseases associated with CASP4 include Cystinosis and Neuroblastoma. Among its related pathways are p53 Signaling and Activated PKN1 stimulates transcription of AR (androgen receptor) regulated genes KLK2 and KLK3.	NA
CD38	CD38 Molecule	CD38 (CD38 Molecule) is a Protein Coding gene. Diseases associated with CD38 include B Cell Prolymphocytic Leukemia and Prolymphocytic Leukemia. Among its related pathways are Calcium signaling pathway and Oxytocin. signaling pathway	cell growth (GO:0016049)
			regulation of system process (GO:0044057)
			circulatory system process (GO:0003013)
			blood circulation (GO:0008015)
			response to steroid hormone (GO:0048545)
			signal release (GO:0023061)
			regulation of blood circulation (GO:1903522)
			multi-multicellular organism process (GO:0044706)
			vascular process in circulatory system (GO:0003018)
			response to ketone (GO:1901654)
			response to progesterone (GO:0032570)
			positive regulation of cell activation (GO:0050867)
			response to decreased oxygen levels (GO:0036293)
			response to hypoxia (GO:0001666)
			positive regulation of leukocyte activation (GO:0002696)
			leukocyte proliferation (GO:0070661)
			mononuclear cell proliferation (GO:0032943)
			lymphocyte proliferation (GO:0046651)
			cytosolic calcium ion homeostasis (GO:0051480)
			positive regulation of lymphocyte activation (GO:0051251)
			positive regulation of cytosolic calcium ion concentration (GO:0007204)
			regulation of leukocyte proliferation (GO:0070663)
			response to estrogen (GO:0043627)
			regulation of mononuclear cell proliferation (GO:0032944)
			regulation of lymphocyte proliferation (GO:0050670)
			female pregnancy (GO:0007565)
			regulation of tube size (GO:0035150)
			regulation of blood vessel size (GO:0050880)
			response to estradiol (GO:0032355)
			positive regulation of leukocyte proliferation (GO:0070665)
			positive regulation of mononuclear cell proliferation (GO:0032946)
			positive regulation of lymphocyte proliferation (GO:0050671)
			vasoconstriction (GO:0042310)
			regulation of vasoconstriction (GO:0019229)
GSTM1	Glutathione S-Transferase Mu 1	GSTM1 (Glutathione S-Transferase Mu 1) is a Protein Coding gene. Diseases associated with GSTM1 include Asbestosis and Oral Leukoplakia. Among its related pathways are Drug metabolism - cytochrome P450 and Busulfan Pathway, Pharmacodynamics.	NA
GREEN MODULE
BRCA1	BRCA1 DNA Repair Associated	BRCA1 (BRCA1 DNA Repair Associated) is a Protein Coding gene. Diseases associated with BRCA1 include Breast-Ovarian Cancer, Familial 1 and Fanconi Anemia, Complementation Group S. Among its related pathways are DNA Double Strand Break Response and p53 Signaling.	cellular process (GO:0009987)
			single-organism cellular process (GO:0044763)
			metabolic process (GO:0008152)
			biological regulation (GO:0065007)
			organic substance metabolic process (GO:0071704)
			cellular metabolic process (GO:0044237)
			primary metabolic process (GO:0044238)
			macromolecule metabolic process (GO:0043170)
			cellular macromolecule metabolic process (GO:0044260)
			nitrogen compound metabolic process (GO:0006807)
			cellular nitrogen compound metabolic process (GO:0034641)
			cellular component organization or biogenesis (GO:0071840)
			cellular component organization (GO:0016043)
			organic cyclic compound metabolic process (GO:1901360)
			cellular aromatic compound metabolic process (GO:0006725)
			heterocycle metabolic process (GO:0046483)
			nucleobase-containing compound metabolic process (GO:0006139)
			biosynthetic process (GO:0009058)
			organic substance biosynthetic process (GO:1901576)
			cellular biosynthetic process (GO:0044249)
			nucleic acid metabolic process (GO:0090304)
			regulation of cellular metabolic process (GO:0031323)
			regulation of primary metabolic process (GO:0080090)
			regulation of macromolecule metabolic process (GO:0060255)
			gene expression (GO:0010467)
			cellular nitrogen compound biosynthetic process (GO:0044271)
			single-organism metabolic process (GO:0044710)
			organelle organization (GO:0006996)
			cellular macromolecule biosynthetic process (GO:0034645)
			cellular protein metabolic process (GO:0044267)
			RNA metabolic process (GO:0016070)
			positive regulation of cellular process (GO:0048522)
			organic cyclic compound biosynthetic process (GO:1901362)
			aromatic compound biosynthetic process (GO:0019438)
			heterocycle biosynthetic process (GO:0018130)
			response to stress (GO:0006950)
			negative regulation of cellular process (GO:0048523)
			single-organism organelle organization (GO:1902589)
			cell cycle (GO:0007049)
			cellular component biogenesis (GO:0044085)
			cell cycle process (GO:0022402)
			macromolecular complex subunit organization (GO:0043933)
			regulation of protein metabolic process (GO:0051246)
			regulation of cellular protein metabolic process (GO:0032268)
			negative regulation of cellular metabolic process (GO:0031324)
			negative regulation of macromolecule metabolic process (GO:0010605)
			cellular component assembly (GO:0022607)
			cellular response to stress (GO:0033554)
			transcription from RNA polymerase II promoter (GO:0006366)
			cell proliferation (GO:0008283)
			regulation of transcription from RNA polymerase II promoter (GO:0006357)
			chromosome organization (GO:0051276)
			DNA metabolic process (GO:0006259)
			embryo development (GO:0009790)
			regulation of cell cycle (GO:0051726)
			cellular response to DNA damage stimulus (GO:0006974)
			embryo development ending in birth or egg hatching (GO:0009792)
			cytoskeleton organization (GO:0007010)
			regulation of organelle organization (GO:0033043)
			chordate embryonic development (GO:0043009)
			regulation of cell cycle process (GO:0010564)
			chromosome segregation (GO:0007059)
			chromatin organization (GO:0006325)
			DNA repair (GO:0006281)
			DNA replication (GO:0006260)
			chromatin modification (GO:0016568)
			microtubule-based process (GO:0007017)
			negative regulation of cell cycle (GO:0045786)
			negative regulation of cellular component organization (GO:0051129)
			organelle assembly (GO:0070925)
			covalent chromatin modification (GO:0016569)
			histone modification (GO:0016570)
			peptidyl-lysine modification (GO:0018205)
			negative regulation of organelle organization (GO:0010639)
			microtubule cytoskeleton organization (GO:0000226)
			positive regulation of cell cycle (GO:0045787)
			regulation of DNA metabolic process (GO:0051052)
			negative regulation of cell cycle process (GO:0010948)
			cell cycle checkpoint (GO:0000075)
			DNA recombination (GO:0006310)
			regulation of chromosome organization (GO:0033044)
			intracellular receptor signaling pathway (GO:0030522)
			positive regulation of cell cycle process (GO:0090068)
			response to ionizing radiation (GO:0010212)
			protein acylation (GO:0043543)
			protein acetylation (GO:0006473)
			DNA integrity checkpoint (GO:0031570)
			double-strand break repair (GO:0006302)
			internal protein amino acid acetylation (GO:0006475)
			peptidyl-lysine acetylation (GO:0018394)
			internal peptidyl-lysine acetylation (GO:0018393)
			histone acetylation (GO:0016573)
			regulation of response to DNA damage stimulus (GO:2001020)
			negative regulation of chromosome organization (GO:2001251)
			recombinational repair (GO:0000725)
			double-strand break repair via homologous recombination (GO:0000724)
			histone H3 acetylation (GO:0043966)
			protein alkylation (GO:0008213)
			protein methylation (GO:0006479)
			regulation of chromatin organization (GO:1902275)
			regulation of chromatin modification (GO:1903308)
			intracellular steroid hormone receptor signaling pathway (GO:0030518)
			negative regulation of cytoskeleton organization (GO:0051494)
			regulation of histone modification (GO:0031056)
			histone methylation (GO:0016571)
			microtubule organizing center organization (GO:0031023)
			centrosome organization (GO:0051297)
			peptidyl-lysine methylation (GO:0018022)
			histone lysine methylation (GO:0034968)
			regulation of DNA repair (GO:0006282)
			centrosome cycle (GO:0007098)
			histone H4 acetylation (GO:0043967)
			androgen receptor signaling pathway (GO:0030521)
			regulation of histone methylation (GO:0031060)
CDCA3	Cell Division Cycle Associated 3	CDCA3 (Cell Division Cycle Associated 3) is a Protein Coding gene. Diseases associated with CDCA3 include Night Blindness, Congenital Stationary, Type 1H and Autosomal Recessive Congenital Stationary Night Blindness. Among its related pathways are Cell cycle_Role of APC in cell cycle regulation.	cellular process (GO:0009987)
			single-organism cellular process (GO:0044763)
			metabolic process (GO:0008152)
			organic substance metabolic process (GO:0071704)
			cellular metabolic process (GO:0044237)
			primary metabolic process (GO:0044238)
			macromolecule metabolic process (GO:0043170)
			cellular macromolecule metabolic process (GO:0044260)
			cellular component organization or biogenesis (GO:0071840)
			cellular component organization (GO:0016043)
			organelle organization (GO:0006996)
			cellular protein metabolic process (GO:0044267)
			single-organism organelle organization (GO:1902589)
			cell cycle (GO:0007049)
			cell cycle process (GO:0022402)
			mitotic cell cycle (GO:0000278)
			mitotic cell cycle process (GO:1903047)
			organelle fission (GO:0048285)
			nuclear division (GO:0000280)
			cell division (GO:0051301)
			mitotic nuclear division (GO:0007067)
CDCA8	Cell Division Cycle Associated 8	CDCA8 (Cell Division Cycle Associated 8) is a Protein Coding gene. Diseases associated with CDCA8 include Cholestasis, Intrahepatic, Of Pregnancy, 1 and Branchiootorenal Syndrome 2. Among its related pathways are Signaling by GPCR and Metabolism of proteins.	cellular process (GO:0009987)
			single-organism cellular process (GO:0044763)
			biological regulation (GO:0065007)
			cellular component organization or biogenesis (GO:0071840)
			cellular component organization (GO:0016043)
			organelle organization (GO:0006996)
			single-organism organelle organization (GO:1902589)
			cell cycle (GO:0007049)
			cell cycle process (GO:0022402)
			mitotic cell cycle (GO:0000278)
			mitotic cell cycle process (GO:1903047)
			chromosome organization (GO:0051276)
			organelle fission (GO:0048285)
			nuclear division (GO:0000280)
			cell division (GO:0051301)
			chromosome segregation (GO:0007059)
			mitotic nuclear division (GO:0007067)
			nuclear chromosome segregation (GO:0098813)
			organelle localization (GO:0051640)
			AURKB
			mitotic sister chromatid segregation (GO:0000070)
			establishment of organelle localization (GO:0051656)
			establishment of chromosome localization (GO:0051303)
			chromosome localization (GO:0050000)
			metaphase plate congression (GO:0051310)
			mitotic metaphase plate congression (GO:0007080)
CDT1	Chromatin Licensing And DNA Replication Factor 1	CDT1 (Chromatin Licensing And DNA Replication Factor 1) is a Protein Coding gene. Diseases associated with CDT1 include Meier-Gorlin Syndrome 4 and Meier-Gorlin Syndrome 1. Among its related pathways are CDK-mediated phosphorylation and removal of Cdc6 and E2F mediated regulation of DNA replication.	cellular process (GO:0009987)
			single-organism cellular process (GO:0044763)
			metabolic process (GO:0008152)
			biological regulation (GO:0065007)
			organic substance metabolic process (GO:0071704)
			cellular metabolic process (GO:0044237)
			primary metabolic process (GO:0044238)
			macromolecule metabolic process (GO:0043170)
			cellular macromolecule metabolic process (GO:0044260)
			nitrogen compound metabolic process (GO:0006807)
			cellular nitrogen compound metabolic process (GO:0034641)
			organic cyclic compound metabolic process (GO:1901360)
			cellular aromatic compound metabolic process (GO:0006725)
			heterocycle metabolic process (GO:0046483)
			nucleobase-containing compound metabolic process (GO:0006139)
			biosynthetic process (GO:0009058)
			organic substance biosynthetic process (GO:1901576)
			cellular biosynthetic process (GO:0044249)
			nucleic acid metabolic process (GO:0090304)
			regulation of cellular metabolic process (GO:0031323)
			regulation of primary metabolic process (GO:0080090)
			regulation of macromolecule metabolic process (GO:0060255)
			gene expression (GO:0010467)
			cellular nitrogen compound biosynthetic process (GO:0044271)
			single-organism metabolic process (GO:0044710)
			cellular macromolecule biosynthetic process (GO:0034645)
			RNA metabolic process (GO:0016070)
			organic cyclic compound biosynthetic process (GO:1901362)
			aromatic compound biosynthetic process (GO:0019438)
			heterocycle biosynthetic process (GO:0018130)
			cell cycle (GO:0007049)
			cell cycle process (GO:0022402)
			mitotic cell cycle (GO:0000278)
			transcription from RNA polymerase II promoter (GO:0006366)
			mitotic cell cycle process (GO:1903047)
			regulation of transcription from RNA polymerase II promoter (GO:0006357)
			DNA metabolic process (GO:0006259)
			regulation of cell cycle (GO:0051726)
			regulation of cell cycle process (GO:0010564)
			cell cycle phase transition (GO:0044770)
			DNA replication (GO:0006260)
			mitotic cell cycle phase transition (GO:0044772)
			regulation of DNA metabolic process (GO:0051052)
			cell cycle checkpoint (GO:0000075)
			DNA-dependent DNA replication (GO:0006261)
			cell cycle G1/S phase transition (GO:0044843)
			DNA integrity checkpoint (GO:0031570)
			regulation of DNA replication (GO:0006275)
			DNA replication initiation (GO:0006270)
			regulation of DNA-dependent DNA replication (GO:0090329)
			regulation of transcription involved in G1/S transition of mitotic cell cycle (GO:0000083)
KIF11	Kinesin Family Member 11	KIF11 (Kinesin Family Member 11) is a Protein Coding gene. Diseases associated with KIF11 include Microcephaly With Or Without Chorioretinopathy, Lymphedema, Or Mental Retardation and Syndromic Rod-Cone Dystrophy. Among its related pathways are Golgi-to-ER retrograde transport and DNA Damage.	cellular process (GO:0009987)
			single-organism cellular process (GO:0044763)
			metabolic process (GO:0008152)
			biological regulation (GO:0065007)
			cellular component organization or biogenesis (GO:0071840)
			cellular component organization (GO:0016043)
			organelle organization (GO:0006996)
			response to stress (GO:0006950)
			single-organism organelle organization (GO:1902589)
			cell cycle (GO:0007049)
			cellular component biogenesis (GO:0044085)
			cell cycle process (GO:0022402)
			macromolecular complex subunit organization (GO:0043933)
			mitotic cell cycle (GO:0000278)
			cellular component assembly (GO:0022607)
			mitotic cell cycle process (GO:1903047)
			organelle fission (GO:0048285)
			nuclear division (GO:0000280)
			macromolecular complex assembly (GO:0065003)
			regulation of cell cycle (GO:0051726)
			cell division (GO:0051301)
			cytoskeleton organization (GO:0007010)
			regulation of organelle organization (GO:0033043)
			regulation of cell cycle process (GO:0010564)
			chromosome segregation (GO:0007059)
			mitotic nuclear division (GO:0007067)
			microtubule-based process (GO:0007017)
			regulation of mitotic cell cycle (GO:0007346)
			organelle assembly (GO:0070925)
			microtubule cytoskeleton organization (GO:0000226)
			regulation of cell division (GO:0051302)
			microtubule-based movement (GO:0007018)
			antigen processing and presentation (GO:0019882)
			antigen processing and presentation of peptide antigen (GO:0048002)
			antigen processing and presentation of exogenous antigen (GO:0019884)
			antigen processing and presentation of exogenous peptide antigen (GO:0002478)
			antigen processing and presentation of peptide or polysaccharide antigen via MHC class II (GO:0002504)
			antigen processing and presentation of peptide antigen via MHC class II (GO:0002495)
			AURKB
			regulation of mitotic nuclear division (GO:0007088)
			microtubule organizing center organization (GO:0031023)
			centrosome organization (GO:0051297)
			centrosome cycle (GO:0007098)
KIF22	Kinesin Family Member 22	KIF22 (Kinesin Family Member 22) is a Protein Coding gene. Diseases associated with KIF22 include Spondyloepimetaphyseal Dysplasia With Joint Laxity, Type 2 and Spondyloepimetaphyseal Dysplasia With Multiple Dislocations. Among its related pathways are Golgi-to-ER retrograde transport and Oocyte meiosis.	cellular process (GO:0009987)
			single-organism cellular process (GO:0044763)
			metabolic process (GO:0008152)
			biological regulation (GO:0065007)
			organic substance metabolic process (GO:0071704)
			cellular metabolic process (GO:0044237)
			primary metabolic process (GO:0044238)
			macromolecule metabolic process (GO:0043170)
			cellular macromolecule metabolic process (GO:0044260)
			nitrogen compound metabolic process (GO:0006807)
			cellular nitrogen compound metabolic process (GO:0034641)
			cellular component organization or biogenesis (GO:0071840)
			cellular component organization (GO:0016043)
			organic cyclic compound metabolic process (GO:1901360)
			cellular aromatic compound metabolic process (GO:0006725)
			heterocycle metabolic process (GO:0046483)
			nucleobase-containing compound metabolic process (GO:0006139)
			nucleic acid metabolic process (GO:0090304)
			single-organism metabolic process (GO:0044710)
			organelle organization (GO:0006996)
			response to stress (GO:0006950)
			single-organism organelle organization (GO:1902589)
			cell cycle (GO:0007049)
			cell cycle process (GO:0022402)
			mitotic cell cycle (GO:0000278)
			cellular response to stress (GO:0033554)
			mitotic cell cycle process (GO:1903047)
			chromosome organization (GO:0051276)
			DNA metabolic process (GO:0006259)
			organelle fission (GO:0048285)
			nuclear division (GO:0000280)
			cellular response to DNA damage stimulus (GO:0006974)
			chromosome segregation (GO:0007059)
			mitotic nuclear division (GO:0007067)
			DNA repair (GO:0006281)
			microtubule-based process (GO:0007017)
			nuclear chromosome segregation (GO:0098813)
			organelle localization (GO:0051640)
			microtubule-based movement (GO:0007018)
			sister chromatid segregation (GO:0000819)
			mitotic sister chromatid segregation (GO:0000070)
			establishment of organelle localization (GO:0051656)
			antigen processing and presentation (GO:0019882)
			antigen processing and presentation of peptide antigen (GO:0048002)
			antigen processing and presentation of exogenous antigen (GO:0019884)
			antigen processing and presentation of exogenous peptide antigen (GO:0002478)
			antigen processing and presentation of peptide or polysaccharide antigen via MHC class II (GO:0002504)
			antigen processing and presentation of peptide antigen via MHC class II (GO:0002495)
			antigen processing and presentation of exogenous peptide antigen via MHC class II (GO:0019886)
			establishment of chromosome localization (GO:0051303)
			chromosome localization (GO:0050000)
			metaphase plate congression (GO:0051310)
			mitotic metaphase plate congression (GO:0007080)
KIF15	Kinesin Family Member 15	KIF15 (Kinesin Family Member 15) is a Protein Coding gene. Diseases associated with KIF15 include 21Q22.11Q22.12 Microdeletion Syndrome and Breast Cancer. Among its related pathways are Golgi-to-ER retrograde transport and Innate Immune System.	cellular process (GO:0009987)
			single-organism cellular process (GO:0044763)
			metabolic process (GO:0008152)
			biological regulation (GO:0065007)
			cellular component organization or biogenesis (GO:0071840)
			cellular component organization (GO:0016043)
			organelle organization (GO:0006996)
			response to stress (GO:0006950)
			single-organism organelle organization (GO:1902589)
			cell cycle (GO:0007049)
			cell cycle process (GO:0022402)
			mitotic cell cycle (GO:0000278)
			mitotic cell cycle process (GO:1903047)
			cell proliferation (GO:0008283)
			organelle fission (GO:0048285)
			nuclear division (GO:0000280)
			mitotic nuclear division (GO:0007067)
			microtubule-based process (GO:0007017)
			microtubule-based movement (GO:0007018)
			antigen processing and presentation (GO:0019882)
			antigen processing and presentation of peptide antigen (GO:0048002)
			antigen processing and presentation of exogenous antigen (GO:0019884)
			antigen processing and presentation of exogenous peptide antigen (GO:0002478)
			antigen processing and presentation of peptide or polysaccharide antigen via MHC class II (GO:0002504)
			antigen processing and presentation of peptide antigen via MHC class II (GO:0002495)
			antigen processing and presentation of exogenous peptide antigen via MHC class II (GO:0019886)
ORC1	Origin Recognition Complex Subunit 1	ORC1 (Origin Recognition Complex Subunit 1) is a Protein Coding gene. Diseases associated with ORC1 include Meier-Gorlin Syndrome 1 and Genitourinary Tract Anomalies. Among its related pathways are CDK-mediated phosphorylation and removal of Cdc6 and E2F mediated regulation of DNA replication.	cellular process (GO:0009987)
			single-organism cellular process (GO:0044763)
			metabolic process (GO:0008152)
			biological regulation (GO:0065007)
			organic substance metabolic process (GO:0071704)
			cellular metabolic process (GO:0044237)
			primary metabolic process (GO:0044238)
			macromolecule metabolic process (GO:0043170)
			cellular macromolecule metabolic process (GO:0044260)
			nitrogen compound metabolic process (GO:0006807)
			cellular nitrogen compound metabolic process (GO:0034641)
			organic cyclic compound metabolic process (GO:1901360)
			cellular aromatic compound metabolic process (GO:0006725)
			heterocycle metabolic process (GO:0046483)
			nucleobase-containing compound metabolic process (GO:0006139)
			biosynthetic process (GO:0009058)
			organic substance biosynthetic process (GO:1901576)
			cellular biosynthetic process (GO:0044249)
			nucleic acid metabolic process (GO:0090304)
			regulation of cellular metabolic process (GO:0031323)
			regulation of primary metabolic process (GO:0080090)
			regulation of macromolecule metabolic process (GO:0060255)
			gene expression (GO:0010467)
			cellular nitrogen compound biosynthetic process (GO:0044271)
			cellular macromolecule biosynthetic process (GO:0034645)
			RNA metabolic process (GO:0016070)
			positive regulation of cellular process (GO:0048522)
			organic cyclic compound biosynthetic process (GO:1901362)
			aromatic compound biosynthetic process (GO:0019438)
			heterocycle biosynthetic process (GO:0018130)
			cell cycle (GO:0007049)
			cell cycle process (GO:0022402)
			mitotic cell cycle (GO:0000278)
			transcription from RNA polymerase II promoter (GO:0006366)
			mitotic cell cycle process (GO:1903047)
			cell proliferation (GO:0008283)
			regulation of transcription from RNA polymerase II promoter (GO:0006357)
			DNA metabolic process (GO:0006259)
			regulation of cell cycle (GO:0051726)
			regulation of cell cycle process (GO:0010564)
			cell cycle phase transition (GO:0044770)
			DNA replication (GO:0006260)
			mitotic cell cycle phase transition (GO:0044772)
			positive regulation of cell cycle (GO:0045787)
			DNA-dependent DNA replication (GO:0006261)
			cell cycle G1/S phase transition (GO:0044843)
			positive regulation of cell cycle process (GO:0090068)
			DNA replication initiation (GO:0006270)
			regulation of transcription involved in G1/S transition of mitotic cell cycle (GO:0000083)
RED MODULE
AURKB	Aurora Kinase B	AURKB (Aurora Kinase B) is a Protein Coding gene. Diseases associated with AURKB include Nk-Cell Enteropathy and Polyploidy. Among its related pathways are Signaling by GPCR and Metabolism of proteins.	single-organism process (GO:0044699)
			single-organism cellular process (GO:0044763)
			response to stimulus (GO:0050896)
			cellular response to stimulus (GO:0051716)
			cell communication (GO:0007154)
			positive regulation of biological process (GO:0048518)
			signaling (GO:0023052)
			single organism signaling (GO:0044700)
			signal transduction (GO:0007165)
			cellular component organization or biogenesis (GO:0071840)
			cellular component organization (GO:0016043)
			positive regulation of cellular process (GO:0048522)
			organelle organization (GO:0006996)
			regulation of molecular function (GO:0065009)
			phosphorus metabolic process (GO:0006793)
			phosphate-containing compound metabolic process (GO:0006796)
			intracellular signal transduction (GO:0035556)
			macromolecular complex subunit organization (GO:0043933)
			phosphorylation (GO:0016310)
			regulation of cellular component organization (GO:0051128)
			cell cycle (GO:0007049)
			protein phosphorylation (GO:0006468)
			cell cycle process (GO:0022402)
			chromosome organization (GO:0051276)
			mitotic cell cycle (GO:0000278)
			response to abiotic stimulus (GO:0009628)
			negative regulation of molecular function (GO:0044092)
			regulation of organelle organization (GO:0033043)
			regulation of cell cycle (GO:0051726)
			small GTPase mediated signal transduction (GO:0007264)
			mitotic cell cycle process (GO:1903047)
			cell division (GO:0051301)
			organelle fission (GO:0048285)
			nuclear division (GO:0000280)
			chromatin organization (GO:0006325)
			negative regulation of cellular component organization (GO:0051129)
			regulation of cell cycle process (GO:0010564)
			mitotic nuclear division (GO:0007067)
			regulation of cell division (GO:0051302)
			negative regulation of organelle organization (GO:0010639)
			regulation of binding (GO:0051098)
			chromosome segregation (GO:0007059)
			negative regulation of cell cycle process (GO:0010948)
			cell cycle checkpoint (GO:0000075)
			nuclear chromosome segregation (GO:0098813)
			positive regulation of cell division (GO:0051781)
			negative regulation of binding (GO:0051100)
			regulation of chromosome segregation (GO:0051983)
			negative regulation of cell division (GO:0051782)
			spindle checkpoint (GO:0031577)
			spindle organization (GO:0007051)
			negative regulation of cytoskeleton organization (GO:0051494)
			anaphase-promoting complex-dependent proteasomal ubiquitin-dependent protein catabolic process (GO:0031145)
			spindle assembly (GO:0051225)
			mitotic spindle organization (GO:0007052)
			microtubule cytoskeleton organization involved in mitosis (GO:1902850)
			mitotic spindle assembly (GO:0090307)
BIRC5	Baculoviral IAP Repeat Containing 5	BIRC5 (Baculoviral IAP Repeat Containing 5) is a Protein Coding gene. Diseases associated with BIRC5 include Malignant Peritoneal Mesothelioma and Adenocarcinoma. Among its related pathways are Signaling by GPCR and Metabolism of proteins.	single-organism process (GO:0044699)
			single-organism cellular process (GO:0044763)
			response to stimulus (GO:0050896)
			cellular response to stimulus (GO:0051716)
			cell communication (GO:0007154)
			positive regulation of biological process (GO:0048518)
			signaling (GO:0023052)
			single organism signaling (GO:0044700)
			signal transduction (GO:0007165)
			cellular component organization or biogenesis (GO:0071840)
			cellular component organization (GO:0016043)
			positive regulation of cellular process (GO:0048522)
			regulation of response to stimulus (GO:0048583)
			organelle organization (GO:0006996)
			regulation of cell communication (GO:0010646)
			regulation of signaling (GO:0023051)
			regulation of molecular function (GO:0065009)
			regulation of signal transduction (GO:0009966)
			phosphorus metabolic process (GO:0006793)
			phosphate-containing compound metabolic process (GO:0006796)
			intracellular signal transduction (GO:0035556)
			macromolecular complex subunit organization (GO:0043933)
			cell proliferation (GO:0008283)
			phosphorylation (GO:0016310)
			regulation of cellular component organization (GO:0051128)
			cell cycle (GO:0007049)
			protein phosphorylation (GO:0006468)
			regulation of cell proliferation (GO:0042127)
			cell cycle process (GO:0022402)
			mitotic cell cycle (GO:0000278)
			negative regulation of molecular function (GO:0044092)
			regulation of organelle organization (GO:0033043)
			regulation of cell cycle (GO:0051726)
			small GTPase mediated signal transduction (GO:0007264)
			positive regulation of cell proliferation (GO:0008284)
			mitotic cell cycle process (GO:1903047)
			cell division (GO:0051301)
			organelle fission (GO:0048285)
			nuclear division (GO:0000280)
			regulation of cell cycle process (GO:0010564)
			mitotic nuclear division (GO:0007067)
			regulation of cell division (GO:0051302)
			chromosome segregation (GO:0007059)
			regulation of nuclear division (GO:0051783)
			cell cycle checkpoint (GO:0000075)
			regulation of mitotic nuclear division (GO:0007088)
			positive regulation of cell division (GO:0051781)
			spindle checkpoint (GO:0031577)
			cell cycle G2/M phase transition (GO:0044839)
			G2/M transition of mitotic cell cycle (GO:0000086)
			spindle organization (GO:0007051)
			spindle assembly (GO:0051225)
			mitotic spindle organization (GO:0007052)
			microtubule cytoskeleton organization involved in mitosis (GO:1902850)
			mitotic spindle assembly (GO:0090307)
NCAPH	Non-SMC Condensin I Complex Subunit H	NCAPH (Non-SMC Condensin I Complex Subunit H) is a Protein Coding gene. Diseases associated with NCAPH include Microcephaly 23, Primary, Autosomal Recessive and Microcephaly. Among its related pathways are Mitotic Prometaphase and Cell Cycle, Mitotic.	single-organism process (GO:0044699)
			single-organism cellular process (GO:0044763)
			cellular component organization or biogenesis (GO:0071840)
			cellular component organization (GO:0016043)
			organelle organization (GO:0006996)
			cell cycle (GO:0007049)
			cell cycle process (GO:0022402)
			chromosome organization (GO:0051276)
			mitotic cell cycle (GO:0000278)
			mitotic cell cycle process (GO:1903047)
			cell division (GO:0051301)
			organelle fission (GO:0048285)
			nuclear division (GO:0000280)
			mitotic nuclear division (GO:0007067)
			chromosome segregation (GO:0007059)
			nuclear chromosome segregation (GO:0098813)
			DNA packaging (GO:0006323)
			sister chromatid segregation (GO:0000819)
			mitotic sister chromatid segregation (GO:0000070)
NEK2	NIMA Related Kinase 2	NEK2 (NIMA Related Kinase 2) is a Protein Coding gene. Diseases associated with NEK2 include Retinitis Pigmentosa 67 and Retinitis Pigmentosa. Among its related pathways are Regulation of PLK1 Activity at G2/M Transition and Organelle biogenesis and maintenance.	single-organism process (GO:0044699)
			single-organism cellular process (GO:0044763)
			cellular component organization or biogenesis (GO:0071840)
			cellular component organization (GO:0016043)
			organelle organization (GO:0006996)
			regulation of molecular function (GO:0065009)
			phosphorus metabolic process (GO:0006793)
			phosphate-containing compound metabolic process (GO:0006796)
			macromolecular complex subunit organization (GO:0043933)
			phosphorylation (GO:0016310)
			regulation of cellular component organization (GO:0051128)
			cell cycle (GO:0007049)
			protein phosphorylation (GO:0006468)
			cell cycle process (GO:0022402)
			chromosome organization (GO:0051276)
			mitotic cell cycle (GO:0000278)
			negative regulation of molecular function (GO:0044092)
			regulation of organelle organization (GO:0033043)
			regulation of cell cycle (GO:0051726)
			mitotic cell cycle process (GO:1903047)
			cell division (GO:0051301)
			organelle fission (GO:0048285)
			nuclear division (GO:0000280)
			negative regulation of cellular component organization (GO:0051129)
			regulation of cell cycle process (GO:0010564)
			mitotic nuclear division (GO:0007067)
			regulation of cell division (GO:0051302)
			negative regulation of organelle organization (GO:0010639)
			regulation of binding (GO:0051098)
			chromosome segregation (GO:0007059)
			regulation of nuclear division (GO:0051783)
			nuclear chromosome segregation (GO:0098813)
			regulation of mitotic nuclear division (GO:0007088)
			negative regulation of binding (GO:0051100)
			regulation of chromosome segregation (GO:0051983)
			cell cycle G2/M phase transition (GO:0044839)
			G2/M transition of mitotic cell cycle (GO:0000086)
			spindle organization (GO:0007051)
			sister chromatid segregation (GO:0000819)
			negative regulation of cytoskeleton organization (GO:0051494)
			mitotic sister chromatid segregation (GO:0000070)
			anaphase-promoting complex-dependent proteasomal ubiquitin-dependent protein catabolic process (GO:0031145)
			regulation of DNA binding (GO:0051101)
			spindle assembly (GO:0051225)
			mitotic spindle organization (GO:0007052)
			microtubule cytoskeleton organization involved in mitosis (GO:1902850)
			negative regulation of DNA binding (GO:0043392)
			mitotic spindle assembly (GO:0090307)

## Sheet: Table S5
Table S5. Differential expression of candidate HSC aging genes
Gene	logFC	Up/Down-regulated
AGTR1	-3.47	downregulated
AURKB	8.318	upregulated
BIRC5	14.1435	upregulated
BRCA1	2.9	upregulated
CASP4	-14.53	downregulated
CD38	-7.59	downregulated
CDCA3	7.58	upregulated
CDCA8	11.56	upregulated
CDT1	9.44	upregulated
GSTM1	-22.56	downregulated
KIF11	-6.6	downregulated
KIF15	-7.6	downregulated
KIF22	6.96	upregulated
NCAPH	5.66772	upregulated
NEK2	3.60149	upregulated
ORC1	-6.6	downregulated

## Sheet: Table S6
Table S6. Primary regulatory network
Interactor1	Interactor2
EFCAB1	hsa-miR-1-3p		TF- prefix is for TFs
C1orf52	hsa-miR-148a-5p
C1orf52	hsa-miR-22-5p
CTSV	hsa-miR-26b-5p
ABCG4	hsa-miR-26b-5p
ADAM9	hsa-miR-126-3p
ADAM9	hsa-miR-126-5p
ADAM9	hsa-miR-26b-5p
ADAM9	hsa-miR-30b-5p
ADAM9	hsa-miR-30c-5p
ADAM9	hsa-miR-30e-5p
ADAM9	hsa-miR-362-3p
ADAM9	hsa-miR-373-3p
ADCY3	hsa-miR-124-3p
ADRM1	hsa-let-7b-5p
ADRM1	hsa-miR-19a-3p
ADRM1	hsa-miR-19b-3p
ADRM1	hsa-miR-24-3p
ADRM1	hsa-miR-484
AGFG1	hsa-miR-103a-3p
AGTR1	hsa-miR-124-3p
AGTR1	hsa-miR-155-5p
AGTR1	hsa-miR-26b-5p
ALCAM	hsa-miR-148a-3p
ALCAM	hsa-miR-148b-3p
ALCAM	hsa-miR-192-5p
ALCAM	hsa-miR-215-5p
ALDH3A1	hsa-miR-145-5p
ALG8	hsa-miR-98-5p
ALKBH1	hsa-miR-98-5p
ANXA2	hsa-miR-1-3p
ANXA2	hsa-miR-155-5p
ANXA2	hsa-miR-218-5p
APPBP2	hsa-miR-128-3p
APPBP2	hsa-miR-148a-3p
APPBP2	hsa-miR-27a-3p
APPBP2	hsa-miR-27b-3p
APPBP2	hsa-miR-513a-5p
ARGLU1	hsa-miR-103a-3p
ARGLU1	hsa-miR-107
ARGLU1	hsa-miR-1-3p
ARGLU1	hsa-miR-155-5p
ARHGAP19	hsa-let-7e-5p
ARHGAP19	hsa-miR-192-5p
ARHGAP19	hsa-miR-193b-3p
ARHGAP19	hsa-miR-24-3p
ARHGAP29	hsa-miR-192-5p
ARHGAP29	hsa-miR-204-5p
ARHGEF39	hsa-miR-3157-5p
ARHGEF7	hsa-miR-24-3p
ARID3B	hsa-let-7a-5p
ARID3B	hsa-let-7b-5p
ARID3B	hsa-let-7c-5p
ARID3B	hsa-let-7d-5p
ARID3B	hsa-let-7e-5p
ARID3B	hsa-let-7f-5p
ARID3B	hsa-let-7g-5p
ARID3B	hsa-let-7i-5p
ARID3B	hsa-miR-125b-5p
ARID3B	hsa-miR-26b-5p
ARID3B	hsa-miR-335-5p
ARID3B	hsa-miR-98-5p
ASAP2	hsa-miR-218-5p
ATF3	hsa-miR-26b-5p
ATF3	hsa-miR-331-3p
ATP1B2	hsa-miR-335-5p
ATP8B2	hsa-miR-124-3p
ATP8B2	hsa-miR-335-5p
AURKB	hsa-let-7a-5p
AURKB	hsa-let-7b-5p
AURKB	hsa-let-7e-5p
AURKB	hsa-let-7i-5p
AURKB	hsa-miR-124-3p
AURKB	hsa-miR-125b-5p
AURKB	hsa-miR-148a-3p
AURKB	hsa-miR-155-5p
AURKB	hsa-miR-16-5p
AURKB	hsa-miR-24-3p
AXIN1	hsa-miR-218-5p
AXIN1	hsa-miR-335-5p
AXIN1	hsa-miR-92a-3p
C17orf53	hsa-miR-26b-5p
BEX4	hsa-miR-425-5p
BIRC5	hsa-miR-135b-5p
BIRC5	hsa-miR-149-5p
BIRC5	hsa-miR-16-5p
BIRC5	hsa-miR-195-5p
BIRC5	hsa-miR-203a-3p
BIRC5	hsa-miR-218-5p
BIRC5	hsa-miR-335-5p
BIRC5	hsa-miR-34a-5p
BIRC5	hsa-miR-497-5p
BIRC5	hsa-miR-542-3p
BIRC5	hsa-miR-5581-5p
BIRC5	hsa-miR-708-5p
BRCA1	hsa-miR-10b-5p
BRCA1	hsa-miR-181a-5p
BRCA1	hsa-miR-192-5p
BRCA1	hsa-miR-193b-3p
BRCA1	hsa-miR-20b-5p
BRCA1	hsa-miR-21-5p
BRCA1	hsa-miR-24-3p
BRCA1	hsa-miR-26a-5p
BRCA1	hsa-miR-335-5p
BRCA1	hsa-miR-34a-5p
BRCA2	hsa-miR-122-5p
BRCA2	hsa-miR-128-3p
BRCA2	hsa-miR-17-5p
BRCA2	hsa-miR-192-5p
BRCA2	hsa-miR-3157-5p
BRD4	hsa-miR-2110
BRD4	hsa-miR-26b-5p
BRD4	hsa-miR-379-3p
BRD4	hsa-miR-484
BSN	hsa-miR-335-5p
BSN	hsa-miR-375
BTG2	hsa-miR-101-3p
BTG2	hsa-miR-106b-5p
BTG2	hsa-miR-125a-5p
BTG2	hsa-miR-125b-2-3p
BTG2	hsa-miR-125b-5p
BTG2	hsa-miR-1260a
BTG2	hsa-miR-1260b
BTG2	hsa-miR-1305
BTG2	hsa-miR-139-5p
BTG2	hsa-miR-144-3p
BTG2	hsa-miR-15a-5p
BTG2	hsa-miR-15b-5p
BTG2	hsa-miR-16-5p
BTG2	hsa-miR-17-3p
BTG2	hsa-miR-17-5p
BTG2	hsa-miR-185-5p
BTG2	hsa-miR-186-5p
BTG2	hsa-miR-188-3p
BTG2	hsa-miR-193b-5p
BTG2	hsa-miR-195-5p
BTG2	hsa-miR-204-3p
BTG2	hsa-miR-20a-5p
BTG2	hsa-miR-21-5p
BTG2	hsa-miR-218-1-3p
BTG2	hsa-miR-218-5p
BTG2	hsa-miR-25-3p
BTG2	hsa-miR-26b-5p
BTG2	hsa-miR-27a-3p
BTG2	hsa-miR-27b-3p
BTG2	hsa-miR-29a-3p
BTG2	hsa-miR-29b-3p
BTG2	hsa-miR-29c-3p
BTG2	hsa-miR-3140-3p
BTG2	hsa-miR-3179
BTG2	hsa-miR-3187-3p
BTG2	hsa-miR-32-5p
BTG2	hsa-miR-339-5p
BTG2	hsa-miR-34b-5p
BTG2	hsa-miR-3609
BTG2	hsa-miR-363-3p
BTG2	hsa-miR-3659
BTG2	hsa-miR-367-3p
BTG2	hsa-miR-449c-5p
BTG2	hsa-miR-505-5p
BTG2	hsa-miR-5682
BTG2	hsa-miR-588
BTG2	hsa-miR-627-5p
BTG2	hsa-miR-636
BTG2	hsa-miR-642b-5p
BTG2	hsa-miR-7-5p
BTG2	hsa-miR-873-5p
BTG2	hsa-miR-877-5p
BTG2	hsa-miR-92a-3p
BTG2	hsa-miR-92b-3p
BTG2	hsa-miR-93-5p
BYSL	hsa-miR-16-5p
C1QB	hsa-miR-26b-5p
CAMP	hsa-miR-124-3p
CA1	hsa-miR-132-3p
CA1	hsa-miR-26b-5p
CASC3	hsa-miR-128-3p
CASC3	hsa-miR-182-5p
CASC3	hsa-miR-193b-3p
CASP4	hsa-miR-26b-5p
CBX8	hsa-miR-106b-5p
CBX8	hsa-miR-17-5p
CBX8	hsa-miR-20a-5p
CBX8	hsa-miR-218-5p
CBX8	hsa-miR-93-5p
CCDC134	hsa-let-7b-5p
CCDC134	hsa-miR-1-3p
CCDC34	hsa-miR-21-5p
CCNT1	hsa-miR-103a-3p
CCNT1	hsa-miR-107
CCNT1	hsa-miR-128-3p
CCNT1	hsa-miR-15a-5p
CCNT1	hsa-miR-15b-5p
CCNT1	hsa-miR-16-5p
CCNT1	hsa-miR-195-5p
CCNT1	hsa-miR-221-5p
CCNT1	hsa-miR-27b-3p
CCNT1	hsa-miR-31-5p
CCNT1	hsa-miR-424-5p
CCNT1	hsa-miR-4326
CCNT1	hsa-miR-497-5p
CCNT1	hsa-miR-500a-5p
CCNT1	hsa-miR-548ax
CCNT1	hsa-miR-5699-3p
CD177	hsa-miR-335-5p
CD38	hsa-miR-140-3p
CD38	hsa-miR-335-5p
CD69	hsa-miR-32-5p
CD69	hsa-miR-335-5p
CD69	hsa-miR-92a-3p
CD69	hsa-miR-92b-3p
CD86	hsa-miR-124-3p
CDC20	hsa-miR-16-5p
CDC20	hsa-miR-192-5p
CDC20	hsa-miR-193b-3p
CDC20	hsa-miR-23b-3p
CDC20	hsa-miR-30a-5p
CDC20	hsa-miR-34a-5p
CDC25A	hsa-miR-103a-3p
CDC25A	hsa-miR-140-3p
CDC25A	hsa-miR-141-3p
CDC25A	hsa-miR-15a-5p
CDC25A	hsa-miR-15b-5p
CDC25A	hsa-miR-16-5p
CDC25A	hsa-miR-192-5p
CDC25A	hsa-miR-193b-3p
CDC25A	hsa-miR-195-5p
CDC25A	hsa-miR-21-5p
CDC25A	hsa-miR-34a-5p
CDC25A	hsa-miR-424-5p
CDC25A	hsa-miR-449a
CDC25A	hsa-miR-449b-5p
CDC25A	hsa-miR-4803
CDC25A	hsa-miR-497-5p
CDC25A	hsa-miR-98-5p
CDCA3	hsa-let-7e-5p
CDCA3	hsa-miR-26b-5p
CDCA3	hsa-miR-3179
CDCA3	hsa-miR-320a
CDCA8	hsa-let-7b-5p
CDCA8	hsa-miR-16-5p
CDH11	hsa-miR-124-3p
CDH11	hsa-miR-27b-3p
CDH11	hsa-miR-335-5p
CDK9	hsa-miR-1-3p
CDK9	hsa-miR-16-5p
CDK9	hsa-miR-92a-3p
CDKN2C	hsa-miR-34a-5p
CDT1	hsa-miR-193b-3p
CENPN	hsa-miR-19b-3p
CEP85	hsa-miR-25-3p
CEP85	hsa-miR-26b-5p
CEP85	hsa-miR-671-5p
CEP85	hsa-miR-92a-3p
CFP	hsa-miR-335-5p
CHD8	hsa-miR-1296-5p
CHD8	hsa-miR-155-5p
CHD8	hsa-miR-218-5p
CHD8	hsa-miR-24-3p
CHD8	hsa-miR-365a-3p
CHD8	hsa-miR-365b-3p
CHMP2A	hsa-let-7b-5p
CHMP2A	hsa-miR-1-3p
CLDN5	hsa-miR-128-3p
ASGR1	hsa-miR-335-5p
CLEC16A	hsa-miR-218-5p
COL3A1	hsa-let-7b-5p
COL3A1	hsa-let-7d-5p
COL3A1	hsa-miR-29a-3p
COL3A1	hsa-miR-29b-1-5p
COL3A1	hsa-miR-29b-3p
COL3A1	hsa-miR-29c-3p
COL3A1	hsa-miR-335-5p
COL4A2	hsa-miR-155-5p
COL4A2	hsa-miR-210-3p
COL4A2	hsa-miR-26b-5p
COL4A2	hsa-miR-29a-3p
COL4A2	hsa-miR-29b-3p
COL4A2	hsa-miR-29c-3p
COL5A1	hsa-miR-143-3p
COL5A1	hsa-miR-145-5p
COL5A1	hsa-miR-26b-5p
COL5A1	hsa-miR-29b-3p
COTL1	hsa-miR-1-3p
COTL1	hsa-miR-193b-3p
COTL1	hsa-miR-320a
COTL1	hsa-miR-331-3p
CRLF3	hsa-miR-10a-5p
CRLF3	hsa-miR-10b-5p
CRLF3	hsa-miR-192-5p
CRLF3	hsa-miR-215-5p
CRLF3	hsa-miR-375
CSNK2A2	hsa-miR-1-3p
CYBB	hsa-miR-34a-5p
DDIAS	hsa-miR-124-3p
DEPDC1B	hsa-miR-455-5p
DEPDC1B	hsa-miR-641
DLK1	hsa-miR-15a-5p
DMTN	hsa-miR-1-3p
DMTN	hsa-miR-93-3p
DNMBP	hsa-miR-124-3p
DNMBP	hsa-miR-23b-3p
DNMBP	hsa-miR-26a-5p
DNMBP	hsa-miR-26b-5p
DNMBP	hsa-miR-335-5p
DSG2	hsa-let-7b-5p
DSG2	hsa-miR-124-3p
DSG2	hsa-miR-126-5p
DSG2	hsa-miR-1-3p
DSG2	hsa-miR-155-5p
DSG2	hsa-miR-30a-5p
DUSP1	hsa-let-7a-5p
DUSP1	hsa-let-7b-5p
DUSP1	hsa-let-7c-5p
DUSP1	hsa-let-7e-5p
DUSP1	hsa-let-7f-5p
DUSP1	hsa-let-7g-5p
DUSP1	hsa-let-7i-5p
DUSP1	hsa-miR-101-3p
DUSP1	hsa-miR-200c-3p
DUSP1	hsa-miR-218-1-3p
DUSP1	hsa-miR-26b-5p
DUSP1	hsa-miR-98-5p
DYNC2H1	hsa-miR-124-3p
DYNC2H1	hsa-miR-125b-5p
DYNC2H1	hsa-miR-155-5p
RNASE2	hsa-miR-335-5p
EGR1	hsa-miR-124-3p
EGR1	hsa-miR-183-5p
EGR1	hsa-miR-191-5p
EGR1	hsa-miR-192-5p
EHD3	hsa-miR-7-5p
EIF3J	hsa-let-7e-5p
EIF3J	hsa-miR-155-5p
EIF3J	hsa-miR-98-5p
FAHD2A	hsa-miR-26b-5p
FAM193A	hsa-miR-26b-5p
FAM46C	hsa-miR-106b-5p
FAM46C	hsa-miR-17-5p
FAM46C	hsa-miR-19a-3p
FAM46C	hsa-miR-19b-3p
FAM46C	hsa-miR-20a-5p
FAM46C	hsa-miR-20b-5p
FAM46C	hsa-miR-335-5p
FAM46C	hsa-miR-33a-5p
FAM46C	hsa-miR-33b-5p
FAM46C	hsa-miR-378a-5p
FAM46C	hsa-miR-450b-5p
FAM46C	hsa-miR-93-5p
FAM46C	hsa-miR-98-5p
FAM53C	hsa-miR-222-3p
FAM53C	hsa-miR-744-5p
FLT3	hsa-miR-335-5p
FOS	hsa-miR-101-3p
FOS	hsa-miR-181a-5p
FOS	hsa-miR-181b-5p
FOS	hsa-miR-192-5p
FOS	hsa-miR-221-3p
FOS	hsa-miR-222-3p
FOS	hsa-miR-335-5p
FOS	hsa-miR-338-3p
FOS	hsa-miR-543
FOS	hsa-miR-7-5p
FRAT2	hsa-miR-1305
FRAT2	hsa-miR-1915-3p
FRAT2	hsa-miR-22-3p
FRAT2	hsa-miR-26a-5p
FRAT2	hsa-miR-26b-5p
FRAT2	hsa-miR-29c-3p
FRAT2	hsa-miR-340-5p
FSCN1	hsa-miR-133a-3p
FSCN1	hsa-miR-133b
FSCN1	hsa-miR-143-3p
FSCN1	hsa-miR-145-5p
FSCN1	hsa-miR-17-3p
FSCN1	hsa-miR-185-3p
FSCN1	hsa-miR-29a-3p
FSCN1	hsa-miR-30a-5p
FSCN1	hsa-miR-4705
FXN	hsa-miR-100-5p
FXN	hsa-miR-124-3p
FXN	hsa-miR-1270
GAPVD1	hsa-let-7b-5p
GAPVD1	hsa-miR-155-5p
GAPVD1	hsa-miR-21-5p
GAPVD1	hsa-miR-30c-5p
GAPVD1	hsa-miR-34a-5p
GAPVD1	hsa-miR-98-5p
GATA1	hsa-miR-335-5p
GCC2	hsa-miR-128-3p
GDA	hsa-miR-124-3p
GGA3	hsa-let-7a-5p
GGA3	hsa-let-7b-5p
GGA3	hsa-let-7c-5p
GGA3	hsa-let-7d-5p
GGA3	hsa-let-7f-5p
GGA3	hsa-let-7g-5p
GGA3	hsa-let-7i-5p
GGA3	hsa-miR-103a-3p
GGA3	hsa-miR-199a-3p
GGA3	hsa-miR-199b-3p
GGA3	hsa-miR-26b-5p
GGA3	hsa-miR-423-5p
GGA3	hsa-miR-615-3p
GGA3	hsa-miR-98-5p
GIGYF1	hsa-miR-106a-5p
GIGYF1	hsa-miR-106b-5p
GIGYF1	hsa-miR-1303
GIGYF1	hsa-miR-17-5p
GIGYF1	hsa-miR-181a-5p
GIGYF1	hsa-miR-181b-5p
GIGYF1	hsa-miR-181c-5p
GIGYF1	hsa-miR-181d-5p
GIGYF1	hsa-miR-185-3p
GIGYF1	hsa-miR-18a-5p
GIGYF1	hsa-miR-18b-5p
GIGYF1	hsa-miR-1908-5p
GIGYF1	hsa-miR-194-5p
GIGYF1	hsa-miR-19a-3p
GIGYF1	hsa-miR-19b-3p
GIGYF1	hsa-miR-20a-3p
GIGYF1	hsa-miR-20a-5p
GIGYF1	hsa-miR-20b-5p
GIGYF1	hsa-miR-224-5p
GIGYF1	hsa-miR-2355-5p
GIGYF1	hsa-miR-24-3p
GIGYF1	hsa-miR-296-5p
GIGYF1	hsa-miR-30a-5p
GIGYF1	hsa-miR-30b-3p
GIGYF1	hsa-miR-30b-5p
GIGYF1	hsa-miR-30c-1-3p
GIGYF1	hsa-miR-30c-2-3p
GIGYF1	hsa-miR-30c-5p
GIGYF1	hsa-miR-30d-5p
GIGYF1	hsa-miR-30e-5p
GIGYF1	hsa-miR-3127-3p
GIGYF1	hsa-miR-3179
GIGYF1	hsa-miR-323a-5p
GIGYF1	hsa-miR-324-5p
GIGYF1	hsa-miR-331-3p
GIGYF1	hsa-miR-33a-5p
GIGYF1	hsa-miR-33b-3p
GIGYF1	hsa-miR-33b-5p
GIGYF1	hsa-miR-34b-5p
GIGYF1	hsa-miR-34c-5p
GIGYF1	hsa-miR-362-3p
GIGYF1	hsa-miR-412-3p
GIGYF1	hsa-miR-4424
GIGYF1	hsa-miR-449a
GIGYF1	hsa-miR-449b-5p
GIGYF1	hsa-miR-449c-5p
GIGYF1	hsa-miR-484
GIGYF1	hsa-miR-490-5p
GIGYF1	hsa-miR-526b-3p
GIGYF1	hsa-miR-615-3p
GIGYF1	hsa-miR-660-3p
GIGYF1	hsa-miR-877-3p
GIGYF1	hsa-miR-93-5p
GIPC2	hsa-miR-335-5p
HECTD4	hsa-miR-335-5p
GPR183	hsa-miR-26b-5p
GTPBP3	hsa-let-7b-5p
GTPBP3	hsa-miR-383-5p
GTPBP3	hsa-miR-522-5p
HELLS	hsa-let-7b-5p
HELLS	hsa-miR-124-3p
HELLS	hsa-miR-193b-3p
HELLS	hsa-miR-7-5p
HIST1H1C	hsa-miR-16-5p
HIST1H1C	hsa-miR-27b-3p
HIST1H1C	hsa-miR-34a-5p
HIST1H1C	hsa-miR-423-5p
HIST1H1C	hsa-miR-629-5p
HIST1H1C	hsa-miR-98-5p
HMOX1	hsa-miR-122-5p
HMOX1	hsa-miR-124-3p
HMOX1	hsa-miR-128-3p
HMOX1	hsa-miR-1-3p
HMOX1	hsa-miR-148b-3p
HMOX1	hsa-miR-16-5p
HMOX1	hsa-miR-24-3p
HMOX1	hsa-miR-26b-5p
HMOX1	hsa-miR-335-5p
HOXB9	hsa-miR-192-5p
HSPA1B	hsa-miR-106b-5p
HSPA1B	hsa-miR-1292-5p
HSPA1B	hsa-miR-132-3p
HSPA1B	hsa-miR-142-3p
HSPA1B	hsa-miR-15a-5p
HSPA1B	hsa-miR-15b-5p
HSPA1B	hsa-miR-16-5p
HSPA1B	hsa-miR-181a-5p
HSPA1B	hsa-miR-181b-5p
HSPA1B	hsa-miR-181c-5p
HSPA1B	hsa-miR-181d-5p
HSPA1B	hsa-miR-195-5p
HSPA1B	hsa-miR-212-3p
HSPA1B	hsa-miR-335-5p
HSPA1B	hsa-miR-340-5p
HSPA1B	hsa-miR-34a-5p
HSPA1B	hsa-miR-3613-3p
HSPA1B	hsa-miR-424-5p
HSPA1B	hsa-miR-455-3p
HSPA1B	hsa-miR-497-5p
HSPA1B	hsa-miR-570-3p
HSPA1B	hsa-miR-615-3p
HSPA1B	hsa-miR-664a-3p
ICE1	hsa-miR-26b-5p
ICOSLG	hsa-let-7a-5p
ICOSLG	hsa-let-7b-5p
ICOSLG	hsa-let-7d-5p
ICOSLG	hsa-let-7e-5p
ICOSLG	hsa-let-7f-5p
ICOSLG	hsa-let-7g-5p
ICOSLG	hsa-let-7i-5p
ICOSLG	hsa-miR-194-3p
ICOSLG	hsa-miR-491-5p
ICOSLG	hsa-miR-98-5p
IER2	hsa-miR-30c-5p
IER2	hsa-miR-634
IGFBP4	hsa-miR-124-3p
IGFBP4	hsa-miR-1915-3p
IGFBP4	hsa-miR-26b-5p
IGFBP4	hsa-miR-335-5p
IGFBP4	hsa-miR-7-5p
INIP	hsa-miR-192-5p
INIP	hsa-miR-340-5p
INPP5B	hsa-miR-26b-5p
INTS6	hsa-miR-1-3p
INTS6	hsa-miR-155-5p
INTS6	hsa-miR-30a-5p
IRAK2	hsa-miR-146a-5p
IRAK2	hsa-miR-335-5p
ITGA2	hsa-miR-103a-3p
ITGA2	hsa-miR-107
ITGA2	hsa-miR-15a-5p
ITGA2	hsa-miR-18a-5p
ITGA2	hsa-miR-18b-5p
ITGA2	hsa-miR-30a-5p
ITGA2	hsa-miR-335-5p
ITGA2	hsa-miR-873-5p
JAM2	hsa-miR-26b-5p
JUN	hsa-miR-101-3p
JUN	hsa-miR-139-5p
JUN	hsa-miR-16-5p
JUN	hsa-miR-200b-3p
JUN	hsa-miR-200c-3p
JUN	hsa-miR-26b-5p
JUN	hsa-miR-29c-3p
JUN	hsa-miR-30a-5p
JUN	hsa-miR-342-3p
JUN	hsa-miR-429
JUN	hsa-miR-93-5p
JUNB	hsa-miR-1226-3p
JUNB	hsa-miR-155-5p
JUNB	hsa-miR-199a-5p
JUNB	hsa-miR-199b-5p
KATNAL1	hsa-let-7d-5p
KATNAL1	hsa-let-7e-5p
KATNAL1	hsa-miR-103a-3p
KATNAL1	hsa-miR-106a-5p
KATNAL1	hsa-miR-106b-5p
KATNAL1	hsa-miR-122-5p
KATNAL1	hsa-miR-15a-5p
KATNAL1	hsa-miR-15b-5p
KATNAL1	hsa-miR-16-5p
KATNAL1	hsa-miR-195-5p
KATNAL1	hsa-miR-20a-5p
KATNAL1	hsa-miR-218-5p
KATNAL1	hsa-miR-5100
KATNAL1	hsa-miR-548a-5p
KATNAL1	hsa-miR-548h-5p
KATNAL1	hsa-miR-548j-5p
KATNAL1	hsa-miR-548k
KATNAL1	hsa-miR-548l
KCNB2	hsa-miR-493-3p
KDM3A	hsa-miR-155-5p
KDM3A	hsa-miR-30b-5p
KDM3A	hsa-miR-30c-5p
KDM3A	hsa-miR-30d-5p
KDM3A	hsa-miR-30e-5p
KDM4B	hsa-miR-335-5p
KIF11	hsa-miR-193b-3p
KIF11	hsa-miR-30a-5p
KIF11	hsa-miR-30b-5p
KIF11	hsa-miR-30c-5p
KIF11	hsa-miR-30d-5p
KIF11	hsa-miR-30e-5p
KIF11	hsa-miR-34a-5p
KIF15	hsa-miR-192-5p
KIF15	hsa-miR-193b-3p
KIF15	hsa-miR-218-5p
KIF18B	hsa-miR-196a-5p
KIF22	hsa-miR-146a-5p
KIF22	hsa-miR-155-5p
KIF22	hsa-miR-193b-3p
KIN	hsa-miR-16-5p
KLF2	hsa-miR-124-3p
KLF2	hsa-miR-92a-3p
KLHDC8B	hsa-let-7a-5p
KLHDC8B	hsa-let-7b-5p
KLHDC8B	hsa-let-7d-5p
KLHDC8B	hsa-let-7e-5p
KLHDC8B	hsa-let-7f-5p
KLHDC8B	hsa-let-7g-5p
KLHDC8B	hsa-let-7i-5p
KLHDC8B	hsa-miR-375
KLHDC8B	hsa-miR-98-5p
KLHL17	hsa-miR-335-5p
KLRB1	hsa-miR-335-5p
LGALS1	hsa-miR-1-3p
LGALS1	hsa-miR-22-3p
LRRC75A	hsa-miR-335-5p
LYZ	hsa-miR-26b-5p
MAN1C1	hsa-miR-93-5p
MARCKSL1	hsa-let-7a-5p
MARCKSL1	hsa-let-7b-5p
MARCKSL1	hsa-let-7c-5p
MARCKSL1	hsa-let-7d-5p
MARCKSL1	hsa-let-7e-5p
MARCKSL1	hsa-let-7f-5p
MARCKSL1	hsa-let-7g-5p
MARCKSL1	hsa-let-7i-5p
MARCKSL1	hsa-miR-128-3p
MARCKSL1	hsa-miR-1296-5p
MARCKSL1	hsa-miR-149-5p
MARCKSL1	hsa-miR-2110
MARCKSL1	hsa-miR-24-3p
MARCKSL1	hsa-miR-30c-2-3p
MARCKSL1	hsa-miR-335-5p
MARCKSL1	hsa-miR-708-5p
MARCKSL1	hsa-miR-7-5p
MARCKSL1	hsa-miR-98-5p
MECR	hsa-miR-1-3p
MECR	hsa-miR-155-5p
MED13L	hsa-let-7a-5p
MED13L	hsa-let-7e-5p
MED13L	hsa-miR-23b-3p
MED13L	hsa-miR-93-5p
MED13L	hsa-miR-98-5p
MMP2	hsa-miR-143-3p
MMP2	hsa-miR-17-5p
MMP2	hsa-miR-29a-3p
MMP2	hsa-miR-29b-3p
MMP2	hsa-miR-29c-3p
MMP2	hsa-miR-335-5p
MMP2	hsa-miR-338-3p
MMP2	hsa-miR-452-5p
MMP9	hsa-miR-21-5p
MMP9	hsa-miR-9-5p
MMS19	hsa-miR-16-5p
MMS19	hsa-miR-24-3p
MMS19	hsa-miR-34a-5p
MND1	hsa-miR-193b-3p
MRPL37	hsa-miR-454-3p
MTF1	hsa-miR-106a-5p
MTF1	hsa-miR-106b-5p
MTF1	hsa-miR-17-5p
MTF1	hsa-miR-20a-5p
MTF1	hsa-miR-20b-5p
MTF1	hsa-miR-32-5p
MTF1	hsa-miR-362-3p
MTF1	hsa-miR-522-5p
MTF1	hsa-miR-92a-3p
MTF1	hsa-miR-92b-3p
MTF1	hsa-miR-93-5p
MTFMT	hsa-miR-155-5p
MTFMT	hsa-miR-935
MXD4	hsa-miR-124-3p
MXD4	hsa-miR-1-3p
MXD4	hsa-miR-335-5p
MYH10	hsa-miR-200a-3p
MYH10	hsa-miR-26a-5p
NCAPH	hsa-miR-192-5p
NCAPH	hsa-miR-193b-3p
NCF4	hsa-miR-335-5p
NDC1	hsa-miR-7-5p
NEIL3	hsa-miR-192-5p
NEK2	hsa-miR-128-3p
NEK8	hsa-miR-532-3p
NKG7	hsa-miR-335-5p
NLE1	hsa-let-7b-5p
NLE1	hsa-miR-16-5p
NLE1	hsa-miR-375
NLE1	hsa-miR-484
NLE1	hsa-miR-98-5p
NLRP10	hsa-miR-335-5p
NLRP1	hsa-miR-335-5p
NRK	hsa-miR-335-5p
NTN4	hsa-miR-20a-5p
NTN4	hsa-miR-335-5p
NUPR1	hsa-miR-124-3p
NUPR1	hsa-miR-335-5p
OASL	hsa-miR-124-3p
OASL	hsa-miR-1-3p
OASL	hsa-miR-146a-5p
OPTN	hsa-miR-17-3p
OPTN	hsa-miR-335-5p
OPTN	hsa-miR-9-5p
ORC1	hsa-miR-124-3p
ORC1	hsa-miR-192-5p
PAPSS1	hsa-let-7b-5p
PAQR5	hsa-miR-20a-5p
PASK	hsa-miR-192-5p
PCMTD2	hsa-miR-142-3p
PCMTD2	hsa-miR-23b-3p
PCMTD2	hsa-miR-365a-3p
PDZD8	hsa-let-7a-5p
PDZD8	hsa-miR-103a-3p
PDZD8	hsa-miR-107
PDZD8	hsa-miR-130b-3p
PDZD8	hsa-miR-218-5p
PDZD8	hsa-miR-25-3p
PDZD8	hsa-miR-32-5p
PDZD8	hsa-miR-335-5p
PDZD8	hsa-miR-532-3p
PDZD8	hsa-miR-92a-3p
PEX26	hsa-miR-1267
PEX26	hsa-miR-518a-5p
PHF10	hsa-miR-192-5p
PHF10	hsa-miR-23b-3p
PHF10	hsa-miR-93-5p
PLXNA2	hsa-miR-124-3p
PLXNA2	hsa-miR-26b-5p
POLE2	hsa-miR-193b-3p
POLE3	hsa-miR-155-5p
POLE3	hsa-miR-26b-5p
POLE3	hsa-miR-7-5p
POLQ	hsa-miR-106b-5p
POLQ	hsa-miR-17-5p
POLQ	hsa-miR-192-5p
POLQ	hsa-miR-193b-3p
POLQ	hsa-miR-20a-5p
POLQ	hsa-miR-20b-5p
POLQ	hsa-miR-30c-5p
POLQ	hsa-miR-3615
POLQ	hsa-miR-576-3p
POLQ	hsa-miR-766-3p
POLQ	hsa-miR-93-5p
PPAN	hsa-miR-124-3p
PPAN	hsa-miR-16-5p
PPAN	hsa-miR-98-5p
PRDM11	hsa-miR-335-5p
PRG3	hsa-miR-335-5p
PRR12	hsa-miR-615-3p
PRR12	hsa-miR-744-5p
PRR12	hsa-miR-766-5p
PRSS50	hsa-miR-124-3p
PSMA3	hsa-miR-378a-3p
PSMD13	hsa-miR-10a-5p
PTGS2	hsa-let-7b-5p
PTGS2	hsa-miR-124-3p
PTGS2	hsa-miR-128-3p
PTGS2	hsa-miR-132-3p
PTGS2	hsa-miR-137
PTGS2	hsa-miR-143-3p
PTGS2	hsa-miR-146a-5p
PTGS2	hsa-miR-16-5p
PTGS2	hsa-miR-181a-5p
PTGS2	hsa-miR-199a-3p
PTGS2	hsa-miR-26a-5p
PTGS2	hsa-miR-26b-5p
PTGS2	hsa-miR-335-5p
PTMA	hsa-miR-125b-2-3p
PTMA	hsa-miR-133a-3p
PTMA	hsa-miR-1-3p
PTMA	hsa-miR-206
PTMA	hsa-miR-296-3p
PTMA	hsa-miR-378a-3p
PTMA	hsa-miR-452-3p
PTMA	hsa-miR-499a-3p
PTMA	hsa-miR-615-3p
PTMA	hsa-miR-92a-1-5p
PTPN7	hsa-miR-335-5p
RAB22A	hsa-miR-106a-5p
RAB22A	hsa-miR-106b-5p
RAB22A	hsa-miR-128-3p
RAB22A	hsa-miR-17-5p
RAB22A	hsa-miR-181c-3p
RAB22A	hsa-miR-203a-3p
RAB22A	hsa-miR-204-5p
RAB22A	hsa-miR-20a-5p
RAB22A	hsa-miR-20b-5p
RAB22A	hsa-miR-21-5p
RAB22A	hsa-miR-27b-5p
RAB22A	hsa-miR-302a-3p
RAB22A	hsa-miR-302b-3p
RAB22A	hsa-miR-302c-3p
RAB22A	hsa-miR-302d-3p
RAB22A	hsa-miR-372-3p
RAB22A	hsa-miR-455-3p
RAB22A	hsa-miR-93-5p
RASEF	hsa-miR-15a-5p
RASEF	hsa-miR-21-5p
RASEF	hsa-miR-218-5p
RASEF	hsa-miR-424-5p
RBBP5	hsa-miR-122-5p
RBBP5	hsa-miR-128-3p
RBBP5	hsa-miR-1-3p
RBBP5	hsa-miR-193b-3p
RBBP5	hsa-miR-27a-3p
RBBP5	hsa-miR-27b-3p
RBL1	hsa-miR-106b-5p
RBL1	hsa-miR-122-5p
RBL1	hsa-miR-17-5p
RBL1	hsa-miR-20a-5p
RBL1	hsa-miR-22-3p
RBM10	hsa-miR-186-5p
RBM10	hsa-miR-92a-3p
RBM10	hsa-miR-92b-3p
RCVRN	hsa-miR-335-5p
REL	hsa-miR-101-3p
REL	hsa-miR-29a-3p
REL	hsa-miR-29b-3p
REL	hsa-miR-29c-3p
REL	hsa-miR-365a-3p
REL	hsa-miR-365b-3p
REL	hsa-miR-500a-5p
REL	hsa-miR-7-5p
REL	hsa-miR-98-5p
RFC5	hsa-miR-1-3p
RFC5	hsa-miR-193b-3p
RGS2	hsa-miR-182-5p
RGS2	hsa-miR-22-3p
RGS2	hsa-miR-96-5p
RGS3	hsa-miR-126-3p
RGS3	hsa-miR-133a-3p
RGS3	hsa-miR-26b-5p
RGS7BP	hsa-miR-335-5p
RHAG	hsa-miR-148b-3p
RHOB	hsa-let-7b-5p
RHOB	hsa-let-7c-5p
RHOB	hsa-miR-19a-3p
RHOB	hsa-miR-19b-3p
RHOB	hsa-miR-21-5p
RHOB	hsa-miR-218-5p
RHOB	hsa-miR-30a-5p
RHOB	hsa-miR-335-5p
RHOB	hsa-miR-4664-5p
RHOB	hsa-miR-518a-5p
RHOB	hsa-miR-527
RHOB	hsa-miR-548d-3p
RHOB	hsa-miR-548n
RHOB	hsa-miR-590-3p
RHOB	hsa-miR-595
RHOB	hsa-miR-642a-5p
RHOB	hsa-miR-92a-2-5p
RIPK4	hsa-miR-124-3p
RIPK4	hsa-miR-26b-5p
RIPK4	hsa-miR-545-5p
RNASEL	hsa-miR-192-5p
RNASEL	hsa-miR-29a-3p
RNASEL	hsa-miR-335-5p
RRP9	hsa-miR-16-5p
S100A8	hsa-miR-98-5p
SAMD14	hsa-miR-26b-5p
SAP30L	hsa-miR-155-5p
SBF1	hsa-miR-16-5p
SBF1	hsa-miR-185-3p
SBF1	hsa-miR-1908-5p
SBF1	hsa-miR-744-5p
SCARB1	hsa-miR-185-5p
SCARB1	hsa-miR-223-3p
SCARB1	hsa-miR-96-5p
SCRN1	hsa-let-7b-5p
SCRN1	hsa-miR-21-5p
SCRN1	hsa-miR-218-5p
SCRN3	hsa-miR-192-5p
SEPT11	hsa-miR-155-5p
SEPT11	hsa-miR-17-5p
SERPINB10	hsa-miR-335-5p
SF3A3	hsa-miR-103a-3p
SF3A3	hsa-miR-16-5p
SFT2D1	hsa-miR-425-5p
SH2D3C	hsa-miR-335-5p
SH2D4A	hsa-miR-1-3p
SIGLEC5	hsa-miR-335-5p
SLC25A38	hsa-miR-92a-3p
SLC38A5	hsa-let-7b-5p
SLC38A5	hsa-miR-124-3p
SLC38A5	hsa-miR-155-5p
SLC38A5	hsa-miR-16-5p
SLC38A5	hsa-miR-30a-5p
SMPD4	hsa-miR-124-3p
SMPD4	hsa-miR-16-5p
SNTB2	hsa-miR-155-5p
SNTB2	hsa-miR-15a-5p
SNTB2	hsa-miR-15b-5p
SNTB2	hsa-miR-16-5p
SNTB2	hsa-miR-17-5p
SNTB2	hsa-miR-195-5p
SNTB2	hsa-miR-30b-5p
SNTB2	hsa-miR-34a-5p
SNTB2	hsa-miR-424-5p
SNTB2	hsa-miR-497-5p
SNTB2	hsa-miR-93-5p
SNX4	hsa-miR-100-5p
SNX4	hsa-miR-10a-5p
SNX4	hsa-miR-10b-5p
SNX4	hsa-miR-218-5p
SNX4	hsa-miR-222-3p
SON	hsa-let-7b-5p
SON	hsa-miR-100-3p
SON	hsa-miR-103a-3p
SON	hsa-miR-126-5p
SON	hsa-miR-1276
SON	hsa-miR-130b-3p
SON	hsa-miR-16-5p
SON	hsa-miR-186-5p
SON	hsa-miR-19b-3p
SON	hsa-miR-21-3p
SON	hsa-miR-302c-3p
SON	hsa-miR-30a-5p
SON	hsa-miR-324-3p
SON	hsa-miR-340-5p
SON	hsa-miR-34a-5p
SON	hsa-miR-361-5p
SON	hsa-miR-374b-5p
SON	hsa-miR-412-3p
SON	hsa-miR-455-3p
SON	hsa-miR-520a-5p
SON	hsa-miR-760
SON	hsa-miR-93-5p
SORBS2	hsa-miR-335-5p
SPARC	hsa-miR-29a-3p
SPARC	hsa-miR-29b-3p
SPARC	hsa-miR-29c-3p
SPARC	hsa-miR-432-5p
SPARC	hsa-miR-4792
SPC24	hsa-miR-1-3p
SPIC	hsa-miR-335-5p
SPTB	hsa-miR-335-5p
SREK1	hsa-miR-103a-3p
SREK1	hsa-miR-107
SREK1	hsa-miR-130b-5p
SREK1	hsa-miR-1-3p
SREK1	hsa-miR-15a-5p
SREK1	hsa-miR-15b-5p
SREK1	hsa-miR-16-5p
SREK1	hsa-miR-195-5p
SREK1	hsa-miR-21-5p
SREK1	hsa-miR-218-5p
SREK1	hsa-miR-424-5p
SREK1	hsa-miR-497-5p
SRL	hsa-miR-335-5p
SSH1	hsa-miR-26b-5p
STEAP3	hsa-miR-16-5p
STEAP3	hsa-miR-92a-3p
STEAP3	hsa-miR-98-5p
STK11	hsa-miR-17-5p
STK11	hsa-miR-93-5p
SYNPO2	hsa-miR-335-5p
SYT15	hsa-miR-375
TACO1	hsa-miR-16-5p
TACO1	hsa-miR-615-3p
TATDN2	hsa-miR-34a-5p
THRAP3	hsa-miR-326
THRAP3	hsa-miR-615-3p
TICRR	hsa-miR-192-5p
TICRR	hsa-miR-193b-3p
TM4SF1	hsa-let-7a-3p
TM4SF1	hsa-let-7f-1-3p
TM4SF1	hsa-miR-103a-3p
TM4SF1	hsa-miR-107
TM4SF1	hsa-miR-128-3p
TM4SF1	hsa-miR-1-3p
TM4SF1	hsa-miR-15a-5p
TM4SF1	hsa-miR-15b-5p
TM4SF1	hsa-miR-16-5p
TM4SF1	hsa-miR-206
TM4SF1	hsa-miR-218-5p
TM4SF1	hsa-miR-497-5p
TM4SF1	hsa-miR-876-3p
TM6SF1	hsa-miR-155-5p
TMEM117	hsa-miR-16-2-3p
TMEM47	hsa-miR-132-3p
TMEM47	hsa-miR-148b-3p
TF	hsa-miR-335-5p
TRIM11	hsa-miR-24-3p
TUBGCP3	hsa-let-7b-5p
TUBGCP3	hsa-miR-192-5p
TUBGCP3	hsa-miR-483-3p
TUFM	hsa-miR-324-5p
TUFM	hsa-miR-615-3p
UBE2C	hsa-miR-140-3p
UBE2C	hsa-miR-16-5p
UBE2C	hsa-miR-193b-3p
UBE2C	hsa-miR-24-3p
UBE2C	hsa-miR-615-3p
UCK2	hsa-let-7b-5p
UCK2	hsa-miR-199a-3p
UCK2	hsa-miR-199b-3p
UCK2	hsa-miR-218-5p
UCK2	hsa-miR-24-3p
UCK2	hsa-miR-34a-5p
UPF3B	hsa-miR-26b-5p
UTP20	hsa-miR-16-5p
UTP20	hsa-miR-98-5p
VCAM1	hsa-miR-126-3p
VCAM1	hsa-miR-155-5p
WDHD1	hsa-miR-218-5p
WDHD1	hsa-miR-26b-5p
WNK1	hsa-let-7a-3p
WNK1	hsa-let-7b-5p
WNK1	hsa-let-7f-1-3p
WNK1	hsa-miR-101-3p
WNK1	hsa-miR-125b-5p
WNK1	hsa-miR-126-5p
WNK1	hsa-miR-130b-5p
WNK1	hsa-miR-144-3p
WNK1	hsa-miR-181a-2-3p
WNK1	hsa-miR-183-5p
WNK1	hsa-miR-18a-3p
WNK1	hsa-miR-192-5p
WNK1	hsa-miR-199a-5p
WNK1	hsa-miR-19a-3p
WNK1	hsa-miR-19b-3p
WNK1	hsa-miR-215-5p
WNK1	hsa-miR-21-5p
WNK1	hsa-miR-26a-5p
WNK1	hsa-miR-26b-5p
WNK1	hsa-miR-27a-3p
WNK1	hsa-miR-27b-3p
WNK1	hsa-miR-320a
WNK1	hsa-miR-378a-3p
WNK1	hsa-miR-423-3p
WNK1	hsa-miR-452-5p
WNK1	hsa-miR-485-5p
WNK1	hsa-miR-548a-3p
WNK1	hsa-miR-548e-3p
WNK1	hsa-miR-590-3p
WNK1	hsa-miR-606
WNK1	hsa-miR-7-1-3p
WNK1	hsa-miR-93-3p
XYLT2	hsa-let-7b-5p
XYLT2	hsa-miR-18a-5p
XYLT2	hsa-miR-92a-3p
ZCCHC6	hsa-miR-335-5p
ZFP3	hsa-miR-335-5p
ZNF317	hsa-let-7b-5p
ZNF317	hsa-miR-218-5p
ZNF317	hsa-miR-24-3p
ZNF317	hsa-miR-301a-3p
ZFP36	hsa-miR-1207-5p
ZFP36	hsa-miR-1299
ZFP36	hsa-miR-155-5p
ZFP36	hsa-miR-27a-3p
ZFP36	hsa-miR-27b-3p
ZFP36	hsa-miR-29a-3p
ZFP36	hsa-miR-4745-5p
ZFP36	hsa-miR-513a-5p
ZFP36	hsa-miR-92a-2-5p
ZNF839	hsa-miR-26b-5p
ZFYVE26	hsa-miR-106a-5p
ZFYVE26	hsa-miR-106b-5p
ZFYVE26	hsa-miR-124-3p
ZFYVE26	hsa-miR-130a-3p
ZFYVE26	hsa-miR-130b-3p
ZFYVE26	hsa-miR-148a-3p
ZFYVE26	hsa-miR-148b-3p
ZFYVE26	hsa-miR-152-3p
ZFYVE26	hsa-miR-17-5p
ZFYVE26	hsa-miR-18b-5p
ZFYVE26	hsa-miR-20a-5p
ZFYVE26	hsa-miR-20b-5p
ZFYVE26	hsa-miR-218-5p
ZFYVE26	hsa-miR-301a-3p
ZFYVE26	hsa-miR-301b-3p
ZFYVE26	hsa-miR-302a-3p
ZFYVE26	hsa-miR-302b-3p
ZFYVE26	hsa-miR-302c-3p
ZFYVE26	hsa-miR-302d-3p
ZFYVE26	hsa-miR-340-5p
ZFYVE26	hsa-miR-372-3p
ZFYVE26	hsa-miR-520a-3p
ZFYVE26	hsa-miR-660-5p
ZFYVE26	hsa-miR-93-5p
TF-ADNP	hsa-miR-21-5p
TF-ADNP	hsa-miR-26b-5p
TF-ADNP	hsa-miR-34a-5p
TF-AEBP2	hsa-miR-101-3p
TF-AEBP2	hsa-miR-103a-3p
TF-AEBP2	hsa-miR-375
TF-AEBP2	hsa-miR-484
TF-AEBP2	hsa-miR-590-3p
TF-AFF1	hsa-miR-142-3p
TF-AFF1	hsa-miR-17-5p
TF-AFF1	hsa-miR-19a-3p
TF-AFF1	hsa-miR-19b-3p
TF-AFF1	hsa-miR-20a-5p
TF-AFF1	hsa-miR-33b-3p
TF-AHR	hsa-let-7d-5p
TF-AHR	hsa-miR-124-3p
TF-AHR	hsa-miR-377-5p
TF-AHR	hsa-miR-98-5p
TF-AR	hsa-miR-361-5p
TF-ARID3A	hsa-let-7a-5p
TF-ARID3A	hsa-let-7b-5p
TF-ARID3A	hsa-let-7c-5p
TF-ARID3A	hsa-let-7d-5p
TF-ARID3A	hsa-let-7e-5p
TF-ARID3A	hsa-let-7f-5p
TF-ARID3A	hsa-let-7g-5p
TF-ARID3A	hsa-let-7i-5p
TF-ARID3A	hsa-miR-125a-5p
TF-ARID3A	hsa-miR-125b-5p
TF-ARID3A	hsa-miR-129-5p
TF-ARID3A	hsa-miR-148a-3p
TF-ARID3A	hsa-miR-148b-3p
TF-ARID3A	hsa-miR-425-3p
TF-ARID3A	hsa-miR-4458
TF-ARID3A	hsa-miR-98-5p
TF-ARNT	hsa-miR-218-5p
TF-ARNT	hsa-miR-221-3p
TF-ARNT	hsa-miR-329-3p
TF-ARNT	hsa-miR-362-3p
TF-ARNT	hsa-miR-603
TF-ARNT2	hsa-let-7e-5p
TF-ARNT2	hsa-miR-26b-5p
TF-ARNTL	hsa-miR-142-3p
TF-ARNTL	hsa-miR-335-5p
TF-ASCL2	hsa-miR-10b-5p
TF-ASCL2	hsa-miR-335-5p
TF-ATF1	hsa-miR-182-5p
TF-ATF1	hsa-miR-192-5p
TF-ATF2	hsa-miR-15a-5p
TF-ATF2	hsa-miR-19b-3p
TF-ATF2	hsa-miR-21-5p
TF-ATF2	hsa-miR-335-5p
TF-ATF3	hsa-miR-26b-5p
TF-ATF3	hsa-miR-331-3p
TF-ATF5	hsa-miR-7-5p
TF-ATF6	hsa-miR-335-5p
TF-ATF6	hsa-miR-424-5p
TF-ATOH1	hsa-miR-335-5p
TF-BACH1	hsa-let-7a-5p
TF-BACH1	hsa-let-7b-5p
TF-BACH1	hsa-let-7c-5p
TF-BACH1	hsa-let-7d-5p
TF-BACH1	hsa-let-7e-5p
TF-BACH1	hsa-let-7f-5p
TF-BACH1	hsa-let-7g-5p
TF-BACH1	hsa-let-7i-5p
TF-BACH1	hsa-miR-142-3p
TF-BACH1	hsa-miR-155-5p
TF-BACH1	hsa-miR-185-5p
TF-BACH1	hsa-miR-196a-5p
TF-BACH1	hsa-miR-196b-5p
TF-BACH1	hsa-miR-20a-5p
TF-BACH1	hsa-miR-31-3p
TF-BACH1	hsa-miR-361-5p
TF-BACH1	hsa-miR-4458
TF-BACH1	hsa-miR-450b-5p
TF-BACH1	hsa-miR-497-3p
TF-BACH1	hsa-miR-548ak
TF-BACH1	hsa-miR-548am-5p
TF-BACH1	hsa-miR-548au-5p
TF-BACH1	hsa-miR-548c-5p
TF-BACH1	hsa-miR-548d-5p
TF-BACH1	hsa-miR-548h-5p
TF-BACH1	hsa-miR-548i
TF-BACH1	hsa-miR-548j-5p
TF-BACH1	hsa-miR-548o-5p
TF-BACH1	hsa-miR-548s
TF-BACH1	hsa-miR-548w
TF-BACH1	hsa-miR-548y
TF-BACH1	hsa-miR-590-3p
TF-BACH1	hsa-miR-643
TF-BACH1	hsa-miR-944
TF-BACH1	hsa-miR-98-5p
TF-BACH2	hsa-miR-335-5p
TF-BARX1	hsa-miR-124-3p
TF-BARX2	hsa-miR-335-5p
TF-BATF	hsa-miR-26b-5p
TF-BCL11A	hsa-miR-148b-3p
TF-BCL11A	hsa-miR-196a-5p
TF-BCL11A	hsa-miR-29c-3p
TF-BCL11A	hsa-miR-30a-5p
TF-BCL11A	hsa-miR-32-5p
TF-BCL11A	hsa-miR-340-5p
TF-BCL6	hsa-miR-124-3p
TF-BCL6	hsa-miR-21-5p
TF-BCL6	hsa-miR-30b-5p
TF-BCL6	hsa-miR-335-5p
TF-BCLAF1	hsa-miR-22-5p
TF-BCLAF1	hsa-miR-34a-5p
TF-BHLHE40	hsa-miR-15a-5p
TF-BHLHE40	hsa-miR-16-5p
TF-BHLHE40	hsa-miR-329-3p
TF-BHLHE40	hsa-miR-335-5p
TF-BHLHE40	hsa-miR-362-3p
TF-BHLHE40	hsa-miR-374a-5p
TF-BHLHE40	hsa-miR-454-3p
TF-BHLHE40	hsa-miR-603
TF-CAMTA1	hsa-miR-106b-5p
TF-CAMTA1	hsa-miR-124-3p
TF-CAMTA1	hsa-miR-129-5p
TF-CAMTA1	hsa-miR-17-5p
TF-CAMTA1	hsa-miR-19a-3p
TF-CAMTA1	hsa-miR-19b-3p
TF-CAMTA1	hsa-miR-20a-5p
TF-CAMTA1	hsa-miR-20b-5p
TF-CAMTA1	hsa-miR-93-5p
TF-CAMTA1	hsa-miR-96-5p
TF-CAMTA2	hsa-miR-151a-5p
TF-CAMTA2	hsa-miR-1914-3p
TF-CDX2	hsa-miR-335-5p
TF-CEBPA	hsa-miR-124-3p
TF-CEBPA	hsa-miR-181a-5p
TF-CEBPB	hsa-miR-155-5p
TF-CEBPB	hsa-miR-191-5p
TF-CEBPB	hsa-miR-34a-5p
TF-CEBPB	hsa-miR-3613-3p
TF-CEBPB	hsa-miR-421
TF-CEBPB	hsa-miR-423-5p
TF-CEBPB	hsa-miR-513c-5p
TF-CEBPB	hsa-miR-616-5p
TF-CEBPD	hsa-miR-103a-2-5p
TF-CEBPD	hsa-miR-140-5p
TF-CEBPD	hsa-miR-421
TF-CEBPD	hsa-miR-98-5p
TF-CEBPG	hsa-miR-125b-5p
TF-CEBPG	hsa-miR-148a-3p
TF-CEBPG	hsa-miR-148b-3p
TF-CEBPG	hsa-miR-186-5p
TF-CLOCK	hsa-miR-106b-5p
TF-CLOCK	hsa-miR-107
TF-CLOCK	hsa-miR-129-5p
TF-CLOCK	hsa-miR-141-3p
TF-CLOCK	hsa-miR-142-3p
TF-CLOCK	hsa-miR-17-5p
TF-CLOCK	hsa-miR-182-5p
TF-CLOCK	hsa-miR-19a-3p
TF-CLOCK	hsa-miR-19b-3p
TF-CLOCK	hsa-miR-20a-5p
TF-CLOCK	hsa-miR-21-5p
TF-CLOCK	hsa-miR-26b-5p
TF-CLOCK	hsa-miR-33b-3p
TF-CLOCK	hsa-miR-4461
TF-CLOCK	hsa-miR-548a-3p
TF-CLOCK	hsa-miR-93-5p
TF-CREB1	hsa-miR-10b-5p
TF-CREB1	hsa-miR-122-5p
TF-CREB1	hsa-miR-181b-5p
TF-CREB1	hsa-miR-182-5p
TF-CREB1	hsa-miR-19b-3p
TF-CREB1	hsa-miR-203a-3p
TF-CREB1	hsa-miR-205-5p
TF-CREB1	hsa-miR-27b-3p
TF-CREB1	hsa-miR-34b-3p
TF-CREB1	hsa-miR-423-5p
TF-CREB1	hsa-miR-582-5p
TF-CREB3	hsa-miR-375
TF-CREM	hsa-let-7c-5p
TF-CTCF	hsa-miR-192-5p
TF-CTCF	hsa-miR-221-3p
TF-CTCF	hsa-miR-24-3p
TF-CUX1	hsa-let-7b-5p
TF-CUX1	hsa-miR-155-5p
TF-CUX1	hsa-miR-218-5p
TF-CUX1	hsa-miR-92a-3p
TF-DLX1	hsa-miR-10b-5p
TF-DLX1	hsa-miR-193b-3p
TF-DLX2	hsa-miR-1296-5p
TF-DLX6	hsa-miR-148b-3p
TF-E2F1	hsa-miR-106a-5p
TF-E2F1	hsa-miR-106b-5p
TF-E2F1	hsa-miR-126-3p
TF-E2F1	hsa-miR-130b-3p
TF-E2F1	hsa-miR-149-3p
TF-E2F1	hsa-miR-17-5p
TF-E2F1	hsa-miR-193b-3p
TF-E2F1	hsa-miR-205-5p
TF-E2F1	hsa-miR-20a-5p
TF-E2F1	hsa-miR-20b-5p
TF-E2F1	hsa-miR-24-3p
TF-E2F1	hsa-miR-330-3p
TF-E2F1	hsa-miR-34a-5p
TF-E2F1	hsa-miR-362-3p
TF-E2F1	hsa-miR-93-5p
TF-E2F2	hsa-miR-155-5p
TF-E2F2	hsa-miR-193b-3p
TF-E2F2	hsa-miR-222-5p
TF-E2F2	hsa-miR-23b-5p
TF-E2F2	hsa-miR-24-3p
TF-E2F2	hsa-miR-28-3p
TF-E2F3	hsa-let-7b-5p
TF-E2F3	hsa-miR-106b-5p
TF-E2F3	hsa-miR-125a-5p
TF-E2F3	hsa-miR-125b-5p
TF-E2F3	hsa-miR-140-5p
TF-E2F3	hsa-miR-141-3p
TF-E2F3	hsa-miR-149-5p
TF-E2F3	hsa-miR-15a-5p
TF-E2F3	hsa-miR-15b-5p
TF-E2F3	hsa-miR-16-5p
TF-E2F3	hsa-miR-17-5p
TF-E2F3	hsa-miR-183-3p
TF-E2F3	hsa-miR-195-5p
TF-E2F3	hsa-miR-200b-3p
TF-E2F3	hsa-miR-200c-3p
TF-E2F3	hsa-miR-20a-5p
TF-E2F3	hsa-miR-21-5p
TF-E2F3	hsa-miR-221-3p
TF-E2F3	hsa-miR-24-3p
TF-E2F3	hsa-miR-30c-5p
TF-E2F3	hsa-miR-32-5p
TF-E2F3	hsa-miR-34a-5p
TF-E2F3	hsa-miR-34c-5p
TF-E2F3	hsa-miR-423-5p
TF-E2F3	hsa-miR-449a
TF-E2F3	hsa-miR-449b-5p
TF-E2F3	hsa-miR-497-5p
TF-E2F3	hsa-miR-503-5p
TF-E2F3	hsa-miR-590-5p
TF-E2F3	hsa-miR-874-3p
TF-E2F3	hsa-miR-92a-3p
TF-E2F4	hsa-miR-124-3p
TF-E2F4	hsa-miR-377-5p
TF-E2F4	hsa-miR-98-5p
TF-E2F6	hsa-let-7a-5p
TF-E2F6	hsa-let-7b-5p
TF-E2F6	hsa-let-7c-5p
TF-E2F6	hsa-let-7d-5p
TF-E2F6	hsa-let-7e-5p
TF-E2F6	hsa-let-7f-5p
TF-E2F6	hsa-let-7g-5p
TF-E2F6	hsa-let-7i-5p
TF-E2F6	hsa-miR-124-3p
TF-E2F6	hsa-miR-151a-5p
TF-E2F6	hsa-miR-193b-3p
TF-E2F6	hsa-miR-28-5p
TF-E2F6	hsa-miR-98-5p
TF-E2F7	hsa-miR-10a-5p
TF-E2F7	hsa-miR-128-3p
TF-E2F7	hsa-miR-15a-5p
TF-E2F7	hsa-miR-15b-5p
TF-E2F7	hsa-miR-16-5p
TF-E2F7	hsa-miR-196a-5p
TF-E2F7	hsa-miR-196b-5p
TF-E2F7	hsa-miR-26a-5p
TF-E2F7	hsa-miR-26b-5p
TF-E2F7	hsa-miR-27a-3p
TF-E2F7	hsa-miR-27b-3p
TF-E2F7	hsa-miR-424-5p
TF-E2F7	hsa-miR-497-5p
TF-E2F7	hsa-miR-548at-5p
TF-E2F7	hsa-miR-9-5p
TF-E2F8	hsa-miR-192-5p
TF-E2F8	hsa-miR-19a-3p
TF-E2F8	hsa-miR-19b-3p
TF-EBF1	hsa-miR-335-5p
TF-EGR1	hsa-miR-124-3p
TF-EGR1	hsa-miR-183-5p
TF-EGR1	hsa-miR-191-5p
TF-EGR1	hsa-miR-192-5p
TF-EGR2	hsa-miR-124-3p
TF-EHF	hsa-miR-335-5p
TF-ELF3	hsa-miR-124-3p
TF-ELF3	hsa-miR-629-5p
TF-ELF3	hsa-miR-9-5p
TF-ELK1	hsa-miR-125a-3p
TF-ELK3	hsa-miR-106b-5p
TF-ELK3	hsa-miR-124-3p
TF-ELK3	hsa-miR-193b-3p
TF-ELK4	hsa-let-7b-5p
TF-ELK4	hsa-miR-103a-3p
TF-ELK4	hsa-miR-106a-5p
TF-ELK4	hsa-miR-106b-5p
TF-ELK4	hsa-miR-107
TF-ELK4	hsa-miR-1270
TF-ELK4	hsa-miR-1305
TF-ELK4	hsa-miR-142-5p
TF-ELK4	hsa-miR-15a-5p
TF-ELK4	hsa-miR-15b-5p
TF-ELK4	hsa-miR-16-1-3p
TF-ELK4	hsa-miR-16-5p
TF-ELK4	hsa-miR-17-5p
TF-ELK4	hsa-miR-20a-5p
TF-ELK4	hsa-miR-20b-5p
TF-ELK4	hsa-miR-302a-3p
TF-ELK4	hsa-miR-302b-3p
TF-ELK4	hsa-miR-302c-3p
TF-ELK4	hsa-miR-302d-3p
TF-ELK4	hsa-miR-372-3p
TF-ELK4	hsa-miR-424-5p
TF-ELK4	hsa-miR-520a-3p
TF-ELK4	hsa-miR-93-5p
TF-ERF	hsa-miR-124-3p
TF-ERG	hsa-miR-133b
TF-ESR1	hsa-miR-145-5p
TF-ESR1	hsa-miR-193b-3p
TF-ESR1	hsa-miR-19a-3p
TF-ESR1	hsa-miR-206
TF-ESR1	hsa-miR-221-3p
TF-ESR1	hsa-miR-22-3p
TF-ESR1	hsa-miR-26a-5p
TF-ESR2	hsa-miR-335-5p
TF-ESRRA	hsa-miR-137
TF-ESRRA	hsa-miR-155-5p
TF-ESRRA	hsa-miR-30a-5p
TF-ETS1	hsa-miR-155-5p
TF-ETS1	hsa-miR-181a-5p
TF-ETS1	hsa-miR-181b-5p
TF-ETS1	hsa-miR-181c-5p
TF-ETS1	hsa-miR-181d-5p
TF-ETS1	hsa-miR-200b-3p
TF-ETS1	hsa-miR-200c-3p
TF-ETS1	hsa-miR-221-3p
TF-ETS1	hsa-miR-222-3p
TF-ETS1	hsa-miR-329-3p
TF-ETS1	hsa-miR-362-3p
TF-ETS1	hsa-miR-377-3p
TF-ETS1	hsa-miR-499a-5p
TF-ETS1	hsa-miR-506-3p
TF-ETS1	hsa-miR-570-3p
TF-ETS1	hsa-miR-9-5p
TF-ETS2	hsa-miR-149-5p
TF-ETS2	hsa-miR-218-5p
TF-ETS2	hsa-miR-877-5p
TF-ETV1	hsa-miR-17-5p
TF-ETV1	hsa-miR-20a-5p
TF-ETV1	hsa-miR-335-5p
TF-ETV4	hsa-miR-26b-5p
TF-ETV5	hsa-miR-335-5p
TF-ETV7	hsa-miR-1-3p
TF-FOS	hsa-miR-101-3p
TF-FOS	hsa-miR-181a-5p
TF-FOS	hsa-miR-181b-5p
TF-FOS	hsa-miR-192-5p
TF-FOS	hsa-miR-221-3p
TF-FOS	hsa-miR-222-3p
TF-FOS	hsa-miR-335-5p
TF-FOS	hsa-miR-338-3p
TF-FOS	hsa-miR-543
TF-FOS	hsa-miR-7-5p
TF-FOSL1	hsa-miR-138-5p
TF-FOSL1	hsa-miR-296-3p
TF-FOSL1	hsa-miR-34a-5p
TF-FOSL1	hsa-miR-363-5p
TF-FOSL1	hsa-miR-449a
TF-FOSL1	hsa-miR-765
TF-FOSL2	hsa-miR-590-3p
TF-FOXA1	hsa-miR-192-5p
TF-FOXA1	hsa-miR-30a-5p
TF-FOXA1	hsa-miR-30b-5p
TF-FOXA1	hsa-miR-30c-5p
TF-FOXA1	hsa-miR-30d-5p
TF-FOXA1	hsa-miR-30e-5p
TF-FOXA2	hsa-miR-199a-3p
TF-FOXA2	hsa-miR-335-5p
TF-FOXC1	hsa-miR-106b-5p
TF-FOXC1	hsa-miR-1292-5p
TF-FOXC1	hsa-miR-17-5p
TF-FOXC1	hsa-miR-204-5p
TF-FOXC1	hsa-miR-20a-5p
TF-FOXC1	hsa-miR-31-5p
TF-FOXC1	hsa-miR-374a-5p
TF-FOXC1	hsa-miR-3913-5p
TF-FOXC1	hsa-miR-561-3p
TF-FOXC1	hsa-miR-93-5p
TF-FOXC1	hsa-miR-940
TF-FOXD2	hsa-miR-26b-5p
TF-FOXD2	hsa-miR-335-5p
TF-FOXG1	hsa-miR-26b-5p
TF-FOXK1	hsa-let-7b-5p
TF-FOXK1	hsa-miR-149-5p
TF-FOXK1	hsa-miR-155-5p
TF-FOXK1	hsa-miR-15a-5p
TF-FOXK1	hsa-miR-15b-5p
TF-FOXK1	hsa-miR-16-5p
TF-FOXK1	hsa-miR-17-3p
TF-FOXK1	hsa-miR-186-5p
TF-FOXK1	hsa-miR-195-5p
TF-FOXK1	hsa-miR-203a-3p
TF-FOXK1	hsa-miR-218-5p
TF-FOXK1	hsa-miR-22-3p
TF-FOXK1	hsa-miR-340-3p
TF-FOXK1	hsa-miR-3677-5p
TF-FOXK1	hsa-miR-424-5p
TF-FOXK1	hsa-miR-455-3p
TF-FOXK1	hsa-miR-497-3p
TF-FOXK1	hsa-miR-497-5p
TF-FOXK1	hsa-miR-532-3p
TF-FOXK1	hsa-miR-542-3p
TF-FOXK1	hsa-miR-615-3p
TF-FOXK1	hsa-miR-658
TF-FOXM1	hsa-miR-26b-5p
TF-FOXO3	hsa-miR-155-5p
TF-FOXO3	hsa-miR-182-5p
TF-FOXO3	hsa-miR-21-5p
TF-FOXO3	hsa-miR-218-5p
TF-FOXO3	hsa-miR-23a-3p
TF-FOXO3	hsa-miR-29a-3p
TF-FOXO3	hsa-miR-335-5p
TF-FOXO3	hsa-miR-590-5p
TF-FOXO4	hsa-miR-335-5p
TF-FOXP1	hsa-miR-100-5p
TF-FOXP1	hsa-miR-19a-3p
TF-FOXP1	hsa-miR-19b-3p
TF-FOXP1	hsa-miR-218-5p
TF-FOXP1	hsa-miR-22-3p
TF-FOXP1	hsa-miR-320a
TF-FOXP1	hsa-miR-335-5p
TF-FOXP1	hsa-miR-34a-5p
TF-FOXP1	hsa-miR-526b-5p
TF-FOXP1	hsa-miR-9-5p
TF-FOXP2	hsa-miR-129-5p
TF-GABPA	hsa-miR-92a-3p
TF-GATA1	hsa-miR-335-5p
TF-GATA2	hsa-miR-26b-5p
TF-GATA2	hsa-miR-27a-3p
TF-GATA3	hsa-miR-10b-5p
TF-GATA3	hsa-miR-132-3p
TF-GATA3	hsa-miR-1-3p
TF-GATA3	hsa-miR-27a-3p
TF-GATA6	hsa-let-7b-5p
TF-GATA6	hsa-miR-106b-5p
TF-GATA6	hsa-miR-124-3p
TF-GATA6	hsa-miR-128-3p
TF-GATA6	hsa-miR-141-3p
TF-GATA6	hsa-miR-181a-5p
TF-GATA6	hsa-miR-181c-5p
TF-GATA6	hsa-miR-183-5p
TF-GATA6	hsa-miR-196a-5p
TF-GATA6	hsa-miR-196b-5p
TF-GATA6	hsa-miR-200a-3p
TF-GATA6	hsa-miR-20a-5p
TF-GATA6	hsa-miR-25-3p
TF-GATA6	hsa-miR-32-5p
TF-GATA6	hsa-miR-375
TF-GATA6	hsa-miR-526b-5p
TF-GATA6	hsa-miR-7-5p
TF-GATA6	hsa-miR-92a-3p
TF-GATA6	hsa-miR-98-5p
TF-GLI2	hsa-miR-1-3p
TF-GLI2	hsa-miR-26b-5p
TF-GLI3	hsa-miR-200c-3p
TF-GLIS3	hsa-miR-218-5p
TF-GMEB2	hsa-miR-19b-3p
TF-GRHL1	hsa-miR-100-5p
TF-GRHL1	hsa-miR-192-5p
TF-GRHL1	hsa-miR-99a-5p
TF-HAND1	hsa-let-7a-5p
TF-HAND1	hsa-let-7b-5p
TF-HAND1	hsa-let-7c-5p
TF-HAND1	hsa-let-7d-5p
TF-HAND1	hsa-let-7e-5p
TF-HAND1	hsa-let-7f-5p
TF-HAND1	hsa-let-7g-5p
TF-HAND1	hsa-let-7i-5p
TF-HAND1	hsa-miR-196a-5p
TF-HAND1	hsa-miR-877-5p
TF-HAND1	hsa-miR-98-5p
TF-HAND2	hsa-miR-1-3p
TF-HBP1	hsa-let-7a-3p
TF-HBP1	hsa-let-7b-3p
TF-HBP1	hsa-let-7f-1-3p
TF-HBP1	hsa-miR-106a-5p
TF-HBP1	hsa-miR-106b-5p
TF-HBP1	hsa-miR-155-5p
TF-HBP1	hsa-miR-17-3p
TF-HBP1	hsa-miR-17-5p
TF-HBP1	hsa-miR-19a-3p
TF-HBP1	hsa-miR-19b-3p
TF-HBP1	hsa-miR-20a-5p
TF-HBP1	hsa-miR-20b-5p
TF-HBP1	hsa-miR-29a-3p
TF-HBP1	hsa-miR-301a-3p
TF-HBP1	hsa-miR-301b-3p
TF-HBP1	hsa-miR-335-5p
TF-HBP1	hsa-miR-454-3p
TF-HBP1	hsa-miR-766-5p
TF-HBP1	hsa-miR-93-5p
TF-HES1	hsa-miR-524-5p
TF-HES1	hsa-miR-9-5p
TF-HES2	hsa-miR-335-5p
TF-HESX1	hsa-miR-192-5p
TF-HIF1A	hsa-miR-138-5p
TF-HIF1A	hsa-miR-17-5p
TF-HIF1A	hsa-miR-186-5p
TF-HIF1A	hsa-miR-18a-5p
TF-HIF1A	hsa-miR-217
TF-HIF1A	hsa-miR-2682-5p
TF-HIF1A	hsa-miR-27a-3p
TF-HIF1A	hsa-miR-338-3p
TF-HIF1A	hsa-miR-424-5p
TF-HIF1A	hsa-miR-429
TF-HIF1A	hsa-miR-4487
TF-HIF1A	hsa-miR-625-3p
TF-HIF1A	hsa-miR-93-5p
TF-HIVEP1	hsa-miR-221-3p
TF-HIVEP1	hsa-miR-25-3p
TF-HIVEP1	hsa-miR-32-5p
TF-HIVEP1	hsa-miR-92a-3p
TF-HIVEP1	hsa-miR-92b-3p
TF-HIVEP1	hsa-miR-98-5p
TF-HIVEP3	hsa-miR-218-5p
TF-HNF4A	hsa-miR-143-3p
TF-HNF4A	hsa-miR-34a-5p
TF-HNF4A	hsa-miR-34b-5p
TF-HNF4A	hsa-miR-34c-5p
TF-HNF4A	hsa-miR-449a
TF-HNF4A	hsa-miR-765
TF-HNF4A	hsa-miR-766-3p
TF-HOXA1	hsa-miR-100-5p
TF-HOXA1	hsa-miR-10a-5p
TF-HOXA1	hsa-miR-30b-5p
TF-HOXA1	hsa-miR-561-5p
TF-HOXA1	hsa-miR-99a-5p
TF-HOXA10	hsa-miR-128-3p
TF-HOXA10	hsa-miR-144-3p
TF-HOXA10	hsa-miR-149-5p
TF-HOXA10	hsa-miR-15a-5p
TF-HOXA10	hsa-miR-15b-5p
TF-HOXA10	hsa-miR-16-5p
TF-HOXA10	hsa-miR-192-5p
TF-HOXA10	hsa-miR-204-5p
TF-HOXA10	hsa-miR-215-5p
TF-HOXA10	hsa-miR-27a-3p
TF-HOXA10	hsa-miR-27b-3p
TF-HOXA10	hsa-miR-320a
TF-HOXA10	hsa-miR-340-5p
TF-HOXA10	hsa-miR-411-3p
TF-HOXA10	hsa-miR-424-5p
TF-HOXA10	hsa-miR-4685-3p
TF-HOXA10	hsa-miR-4783-3p
TF-HOXA10	hsa-miR-497-5p
TF-HOXA13	hsa-miR-142-3p
TF-HOXA13	hsa-miR-17-3p
TF-HOXA13	hsa-miR-192-5p
TF-HOXA13	hsa-miR-32-5p
TF-HOXA13	hsa-miR-34a-5p
TF-HOXA2	hsa-miR-335-5p
TF-HOXA5	hsa-miR-130a-3p
TF-HOXA5	hsa-miR-130b-3p
TF-HOXA5	hsa-miR-196a-5p
TF-HOXA5	hsa-miR-196b-5p
TF-HOXA5	hsa-miR-19a-3p
TF-HOXA5	hsa-miR-19b-3p
TF-HOXA5	hsa-miR-26a-5p
TF-HOXA5	hsa-miR-301a-3p
TF-HOXA5	hsa-miR-301b-3p
TF-HOXA5	hsa-miR-454-3p
TF-HOXA5	hsa-miR-484
TF-HOXA5	hsa-miR-96-5p
TF-HOXA7	hsa-miR-196a-5p
TF-HOXA7	hsa-miR-423-5p
TF-HOXB13	hsa-miR-375
TF-HOXC6	hsa-miR-128-3p
TF-HOXC6	hsa-miR-27a-3p
TF-HOXC6	hsa-miR-335-5p
TF-HOXC9	hsa-miR-124-3p
TF-HOXD11	hsa-let-7b-5p
TF-HOXD11	hsa-miR-10b-5p
TF-HSF1	hsa-let-7c-5p
TF-HSF1	hsa-miR-26b-5p
TF-ID1	hsa-let-7c-5p
TF-ID1	hsa-miR-124-3p
TF-ID1	hsa-miR-192-5p
TF-ID1	hsa-miR-26b-5p
TF-ID1	hsa-miR-381-3p
TF-ID2	hsa-miR-124-3p
TF-ID2	hsa-miR-192-5p
TF-IKZF1	hsa-miR-26b-5p
TF-IKZF5	hsa-miR-20a-5p
TF-IRF1	hsa-miR-130a-3p
TF-IRF1	hsa-miR-130b-3p
TF-IRF1	hsa-miR-301a-3p
TF-IRF1	hsa-miR-301b-3p
TF-IRF1	hsa-miR-383-5p
TF-IRF1	hsa-miR-454-3p
TF-IRF1	hsa-miR-93-5p
TF-IRF2	hsa-miR-18a-5p
TF-IRF2	hsa-miR-302c-3p
TF-IRF2	hsa-miR-335-5p
TF-IRF4	hsa-miR-125b-5p
TF-IRF4	hsa-miR-26a-5p
TF-IRF4	hsa-miR-26b-5p
TF-IRF4	hsa-miR-331-5p
TF-IRF9	hsa-miR-106b-5p
TF-IRX2	hsa-miR-335-5p
TF-JUN	hsa-miR-101-3p
TF-JUN	hsa-miR-139-5p
TF-JUN	hsa-miR-16-5p
TF-JUN	hsa-miR-200b-3p
TF-JUN	hsa-miR-200c-3p
TF-JUN	hsa-miR-26b-5p
TF-JUN	hsa-miR-29c-3p
TF-JUN	hsa-miR-30a-5p
TF-JUN	hsa-miR-342-3p
TF-JUN	hsa-miR-429
TF-JUN	hsa-miR-93-5p
TF-JUNB	hsa-miR-1226-3p
TF-JUNB	hsa-miR-155-5p
TF-JUNB	hsa-miR-199a-5p
TF-JUNB	hsa-miR-199b-5p
TF-JUND	hsa-miR-186-5p
TF-JUND	hsa-miR-335-5p
TF-KDM5A	hsa-miR-181a-5p
TF-KDM5A	hsa-miR-181c-5p
TF-KDM5A	hsa-miR-182-5p
TF-KDM5A	hsa-miR-335-5p
TF-KDM5A	hsa-miR-522-5p
TF-KDM5A	hsa-miR-96-5p
TF-KDM5B	hsa-let-7i-5p
TF-KDM5B	hsa-miR-296-3p
TF-KDM5B	hsa-miR-29a-3p
TF-KDM5B	hsa-miR-29c-3p
TF-KDM5B	hsa-miR-335-5p
TF-KDM5B	hsa-miR-766-3p
TF-KLF11	hsa-miR-141-3p
TF-KLF11	hsa-miR-200a-3p
TF-KLF11	hsa-miR-200b-3p
TF-KLF11	hsa-miR-200c-3p
TF-KLF11	hsa-miR-429
TF-KLF11	hsa-miR-93-5p
TF-KLF3	hsa-miR-106a-5p
TF-KLF3	hsa-miR-106b-5p
TF-KLF3	hsa-miR-17-5p
TF-KLF3	hsa-miR-20a-5p
TF-KLF3	hsa-miR-20b-5p
TF-KLF3	hsa-miR-23a-3p
TF-KLF3	hsa-miR-302c-3p
TF-KLF3	hsa-miR-335-5p
TF-KLF3	hsa-miR-93-5p
TF-KLF3	hsa-miR-98-5p
TF-KLF4	hsa-miR-103a-3p
TF-KLF4	hsa-miR-107
TF-KLF4	hsa-miR-10b-5p
TF-KLF4	hsa-miR-124-3p
TF-KLF4	hsa-miR-128-3p
TF-KLF4	hsa-miR-145-5p
TF-KLF4	hsa-miR-152-3p
TF-KLF4	hsa-miR-25-3p
TF-KLF4	hsa-miR-29a-3p
TF-KLF4	hsa-miR-29c-3p
TF-KLF4	hsa-miR-30b-5p
TF-KLF4	hsa-miR-32-5p
TF-KLF4	hsa-miR-335-5p
TF-KLF4	hsa-miR-34a-5p
TF-KLF4	hsa-miR-92a-3p
TF-KLF5	hsa-miR-128-3p
TF-KLF5	hsa-miR-141-3p
TF-KLF5	hsa-miR-21-5p
TF-KLF5	hsa-miR-9-5p
TF-KLF9	hsa-miR-124-3p
TF-KLF9	hsa-miR-21-5p
TF-KLF9	hsa-miR-218-5p
TF-KLF9	hsa-miR-30a-5p
TF-KLF9	hsa-miR-335-5p
TF-LEF1	hsa-miR-193b-3p
TF-LEF1	hsa-miR-218-5p
TF-LEF1	hsa-miR-34a-5p
TF-LHX2	hsa-miR-124-3p
TF-LYL1	hsa-miR-10b-5p
TF-LYL1	hsa-miR-335-5p
TF-MAFB	hsa-miR-130a-3p
TF-MAFB	hsa-miR-335-5p
TF-MAFF	hsa-miR-335-5p
TF-MAFG	hsa-miR-26b-5p
TF-MAFG	hsa-miR-3179
TF-MAFK	hsa-miR-15a-5p
TF-MAFK	hsa-miR-15b-5p
TF-MAFK	hsa-miR-16-5p
TF-MAFK	hsa-miR-195-5p
TF-MAFK	hsa-miR-497-5p
TF-MAFK	hsa-miR-532-3p
TF-MAX	hsa-let-7f-2-3p
TF-MAX	hsa-miR-193b-3p
TF-MAX	hsa-miR-22-3p
TF-MAX	hsa-miR-320a
TF-MAX	hsa-miR-320b
TF-MAX	hsa-miR-320c
TF-MAX	hsa-miR-320d
TF-MAX	hsa-miR-365a-3p
TF-MAZ	hsa-miR-122-5p
TF-MAZ	hsa-miR-1226-3p
TF-MAZ	hsa-miR-124-3p
TF-MAZ	hsa-miR-148b-3p
TF-MAZ	hsa-miR-149-3p
TF-MAZ	hsa-miR-193b-3p
TF-MAZ	hsa-miR-27a-5p
TF-MAZ	hsa-miR-29a-3p
TF-MAZ	hsa-miR-29b-3p
TF-MAZ	hsa-miR-29c-3p
TF-MAZ	hsa-miR-30b-3p
TF-MAZ	hsa-miR-30c-2-3p
TF-MAZ	hsa-miR-30d-5p
TF-MAZ	hsa-miR-326
TF-MAZ	hsa-miR-331-3p
TF-MAZ	hsa-miR-421
TF-MAZ	hsa-miR-491-5p
TF-MAZ	hsa-miR-505-3p
TF-MAZ	hsa-miR-615-3p
TF-MAZ	hsa-miR-615-5p
TF-MAZ	hsa-miR-7-5p
TF-MAZ	hsa-miR-92a-1-5p
TF-MBD2	hsa-miR-375
TF-MBD3	hsa-miR-124-3p
TF-MBD3	hsa-miR-339-5p
TF-MBD3	hsa-miR-766-3p
TF-MBD4	hsa-miR-19a-3p
TF-MBD4	hsa-miR-19b-3p
TF-MBD4	hsa-miR-298
TF-MBD4	hsa-miR-424-5p
TF-MEF2A	hsa-miR-132-3p
TF-MEF2A	hsa-miR-155-5p
TF-MEF2A	hsa-miR-21-5p
TF-MEF2A	hsa-miR-335-5p
TF-MEF2C	hsa-let-7c-5p
TF-MEF2C	hsa-miR-26b-5p
TF-MITF	hsa-miR-182-5p
TF-MITF	hsa-miR-224-5p
TF-MITF	hsa-miR-675-5p
TF-MITF	hsa-miR-98-5p
TF-MIXL1	hsa-miR-145-5p
TF-MNT	hsa-miR-218-5p
TF-MNT	hsa-miR-331-3p
TF-MNT	hsa-miR-423-5p
TF-MNT	hsa-miR-4726-3p
TF-MNT	hsa-miR-744-5p
TF-MSC	hsa-miR-218-5p
TF-MTA3	hsa-miR-495-3p
TF-MTF1	hsa-miR-106a-5p
TF-MTF1	hsa-miR-106b-5p
TF-MTF1	hsa-miR-17-5p
TF-MTF1	hsa-miR-20a-5p
TF-MTF1	hsa-miR-20b-5p
TF-MTF1	hsa-miR-32-5p
TF-MTF1	hsa-miR-362-3p
TF-MTF1	hsa-miR-522-5p
TF-MTF1	hsa-miR-92a-3p
TF-MTF1	hsa-miR-92b-3p
TF-MTF1	hsa-miR-93-5p
TF-MXD1	hsa-miR-138-5p
TF-MXD1	hsa-miR-19a-3p
TF-MXD1	hsa-miR-19b-3p
TF-MXD1	hsa-miR-335-5p
TF-MXI1	hsa-miR-106b-5p
TF-MXI1	hsa-miR-17-5p
TF-MXI1	hsa-miR-192-5p
TF-MXI1	hsa-miR-20a-5p
TF-MXI1	hsa-miR-20b-5p
TF-MXI1	hsa-miR-24-3p
TF-MXI1	hsa-miR-26b-5p
TF-MXI1	hsa-miR-335-5p
TF-MXI1	hsa-miR-93-5p
TF-MYB	hsa-miR-103a-3p
TF-MYB	hsa-miR-107
TF-MYB	hsa-miR-150-5p
TF-MYB	hsa-miR-155-5p
TF-MYB	hsa-miR-15a-5p
TF-MYB	hsa-miR-16-5p
TF-MYB	hsa-miR-192-5p
TF-MYB	hsa-miR-193b-3p
TF-MYB	hsa-miR-195-5p
TF-MYB	hsa-miR-34a-5p
TF-MYBL1	hsa-miR-155-5p
TF-MYBL1	hsa-miR-15a-5p
TF-MYBL1	hsa-miR-193b-3p
TF-MYBL1	hsa-miR-221-3p
TF-MYBL1	hsa-miR-373-3p
TF-MYBL1	hsa-miR-375
TF-MYBL1	hsa-miR-548d-3p
TF-MYBL2	hsa-miR-30a-5p
TF-MYBL2	hsa-miR-30b-5p
TF-MYBL2	hsa-miR-30c-5p
TF-MYBL2	hsa-miR-30d-5p
TF-MYBL2	hsa-miR-30e-5p
TF-MYC	hsa-let-7a-5p
TF-MYC	hsa-let-7b-5p
TF-MYC	hsa-let-7c-5p
TF-MYC	hsa-let-7d-5p
TF-MYC	hsa-let-7e-5p
TF-MYC	hsa-let-7f-5p
TF-MYC	hsa-let-7g-5p
TF-MYC	hsa-let-7i-5p
TF-MYC	hsa-miR-106b-5p
TF-MYC	hsa-miR-1248
TF-MYC	hsa-miR-125a-3p
TF-MYC	hsa-miR-125a-5p
TF-MYC	hsa-miR-1294
TF-MYC	hsa-miR-1304-5p
TF-MYC	hsa-miR-130a-3p
TF-MYC	hsa-miR-135b-5p
TF-MYC	hsa-miR-145-5p
TF-MYC	hsa-miR-148a-3p
TF-MYC	hsa-miR-148a-5p
TF-MYC	hsa-miR-151a-5p
TF-MYC	hsa-miR-16-2-3p
TF-MYC	hsa-miR-16-5p
TF-MYC	hsa-miR-17-5p
TF-MYC	hsa-miR-196a-5p
TF-MYC	hsa-miR-196b-5p
TF-MYC	hsa-miR-20a-5p
TF-MYC	hsa-miR-21-5p
TF-MYC	hsa-miR-222-3p
TF-MYC	hsa-miR-23a-3p
TF-MYC	hsa-miR-24-3p
TF-MYC	hsa-miR-25-3p
TF-MYC	hsa-miR-2682-5p
TF-MYC	hsa-miR-26a-5p
TF-MYC	hsa-miR-29b-3p
TF-MYC	hsa-miR-30a-3p
TF-MYC	hsa-miR-30c-5p
TF-MYC	hsa-miR-30d-3p
TF-MYC	hsa-miR-30d-5p
TF-MYC	hsa-miR-30e-3p
TF-MYC	hsa-miR-3157-5p
TF-MYC	hsa-miR-3159
TF-MYC	hsa-miR-320a
TF-MYC	hsa-miR-335-5p
TF-MYC	hsa-miR-33a-5p
TF-MYC	hsa-miR-34a-5p
TF-MYC	hsa-miR-34b-5p
TF-MYC	hsa-miR-34c-5p
TF-MYC	hsa-miR-375
TF-MYC	hsa-miR-449a
TF-MYC	hsa-miR-449c-5p
TF-MYC	hsa-miR-4510
TF-MYC	hsa-miR-451a
TF-MYC	hsa-miR-455-3p
TF-MYC	hsa-miR-4677-3p
TF-MYC	hsa-miR-494-3p
TF-MYC	hsa-miR-516a-5p
TF-MYC	hsa-miR-548au-3p
TF-MYC	hsa-miR-622
TF-MYC	hsa-miR-92a-1-5p
TF-MYC	hsa-miR-92a-3p
TF-MYC	hsa-miR-92b-3p
TF-MYC	hsa-miR-93-5p
TF-MYC	hsa-miR-940
TF-MYC	hsa-miR-98-5p
TF-MYOD1	hsa-miR-335-5p
TF-NANOG	hsa-miR-335-5p
TF-NCOR1	hsa-let-7b-5p
TF-NCOR2	hsa-miR-10a-5p
TF-NCOR2	hsa-miR-10b-5p
TF-NCOR2	hsa-miR-15a-5p
TF-NCOR2	hsa-miR-15b-5p
TF-NCOR2	hsa-miR-16-5p
TF-NCOR2	hsa-miR-195-5p
TF-NCOR2	hsa-miR-9-5p
TF-NFAT5	hsa-miR-103a-2-5p
TF-NFAT5	hsa-miR-106a-5p
TF-NFAT5	hsa-miR-106b-5p
TF-NFAT5	hsa-miR-17-3p
TF-NFAT5	hsa-miR-17-5p
TF-NFAT5	hsa-miR-20a-5p
TF-NFAT5	hsa-miR-211-5p
TF-NFAT5	hsa-miR-21-5p
TF-NFAT5	hsa-miR-30a-5p
TF-NFAT5	hsa-miR-30b-5p
TF-NFAT5	hsa-miR-30c-5p
TF-NFAT5	hsa-miR-30d-5p
TF-NFAT5	hsa-miR-30e-5p
TF-NFAT5	hsa-miR-335-5p
TF-NFAT5	hsa-miR-3689a-3p
TF-NFAT5	hsa-miR-4690-5p
TF-NFAT5	hsa-miR-921
TF-NFAT5	hsa-miR-93-5p
TF-NFAT5	hsa-miR-9-5p
TF-NFATC1	hsa-miR-124-3p
TF-NFATC3	hsa-let-7b-5p
TF-NFATC3	hsa-miR-185-5p
TF-NFATC3	hsa-miR-218-5p
TF-NFATC3	hsa-miR-522-5p
TF-NFATC3	hsa-miR-9-5p
TF-NFE2L2	hsa-miR-142-5p
TF-NFE2L2	hsa-miR-144-3p
TF-NFE2L2	hsa-miR-153-3p
TF-NFE2L2	hsa-miR-26b-5p
TF-NFE2L2	hsa-miR-27a-3p
TF-NFE2L2	hsa-miR-27b-3p
TF-NFE2L2	hsa-miR-374a-5p
TF-NFIC	hsa-miR-124-3p
TF-NFIC	hsa-miR-125a-3p
TF-NFIC	hsa-miR-1276
TF-NFIC	hsa-miR-16-5p
TF-NFIC	hsa-miR-185-3p
TF-NFIC	hsa-miR-1914-3p
TF-NFIC	hsa-miR-210-3p
TF-NFIC	hsa-miR-214-3p
TF-NFIC	hsa-miR-296-5p
TF-NFIC	hsa-miR-3179
TF-NFIC	hsa-miR-485-5p
TF-NFIC	hsa-miR-5008-5p
TF-NFIC	hsa-miR-5010-3p
TF-NFIC	hsa-miR-506-3p
TF-NFIC	hsa-miR-92a-2-5p
TF-NFIL3	hsa-miR-335-5p
TF-NFIL3	hsa-miR-98-5p
TF-NFKB2	hsa-miR-193b-3p
TF-NFKB2	hsa-miR-98-5p
TF-NFYA	hsa-miR-140-3p
TF-NFYA	hsa-miR-192-5p
TF-NFYA	hsa-miR-203a-3p
[truncated: 15,321 more rows]

## Sheet: Table S7
Table S7. Composite feed forward loops (FFLs) identified. For convenience, transcription factors and genes are prefixed with TF- and G-, respectively
G-ZFYVE26	miR-130a-3p	TF-ZBTB7A
G-ZFYVE26	miR-130a-3p	TF-MYC
G-ZFYVE26	miR-301b-3p	TF-ZBTB7A
miR-301a-3p	G-ZFYVE26	TF-ZBTB7A
miR-130b-3p	G-ZFYVE26	TF-NR3C1
miR-130b-3p	G-ZFYVE26	TF-STAT3
miR-130b-3p	G-ZFYVE26	TF-ZBTB7A
miR-148a-3p	G-ZFYVE26	TF-MYC
miR-148b-3p	G-ZFYVE26	TF-BCL11A
miR-148b-3p	G-ZFYVE26	TF-SNAI2
miR-340-5p	G-ZFYVE26	TF-BCL11A
miR-340-5p	G-ZFYVE26	TF-YY1
miR-218-5p	G-ZFYVE26	TF-SNAI2
miR-218-5p	G-ZFYVE26	TF-ARNT
miR-124-3p	G-ZFYVE26	TF-PBX1
miR-124-3p	G-ZFYVE26	TF-NR3C1
miR-124-3p	G-ZFYVE26	TF-GATA6
miR-124-3p	G-ZFYVE26	TF-SNAI2
miR-124-3p	G-ZFYVE26	TF-E2F4
miR-124-3p	G-ZFYVE26	TF-STAT3
miR-124-3p	G-ZFYVE26	TF-NFIC
miR-124-3p	G-ZFYVE26	TF-STAT5A
miR-124-3p	G-ZFYVE26	TF-RELA
miR-124-3p	G-ZFYVE26	TF-SP1
miR-124-3p	G-ZFYVE26	TF-EGR1
miR-24-3p	G-TRIM11	TF-E2F1
miR-24-3p	G-TRIM11	TF-CTCF
miR-24-3p	G-TRIM11	TF-TP53
miR-24-3p	G-TRIM11	TF-MYC
miR-24-3p	G-GIGYF1	TF-CTCF
miR-24-3p	G-GIGYF1	TF-TP53
miR-30a-5p	G-GIGYF1	TF-TP53
miR-21-5p	G-CCDC34	TF-BCL6
miR-21-5p	G-CCDC34	TF-MYC
miR-21-5p	G-RAB22A	TF-STAT3
miR-21-5p	G-RAB22A	TF-KLF5
miR-21-5p	G-RAB22A	TF-SP1
miR-21-5p	G-RAB22A	TF-MYC
miR-98-5p	G-FAM46C	TF-E2F4
miR-98-5p	G-FAM46C	TF-MYC
miR-335-5p	G-FAM46C	TF-EBF1
miR-335-5p	G-FAM46C	TF-SP4
miR-335-5p	G-FAM46C	TF-FOS
miR-335-5p	G-FAM46C	TF-BCL6
miR-335-5p	G-FAM46C	TF-FOXD2
miR-335-5p	G-FAM46C	TF-HOXC6
miR-335-5p	G-FAM46C	TF-ZEB1
miR-335-5p	G-FAM46C	TF-KLF9
miR-335-5p	G-FAM46C	TF-KLF4
miR-335-5p	G-FAM46C	TF-SP1
miR-335-5p	G-FAM46C	TF-SPDEF
miR-335-5p	G-FAM46C	TF-MYC
miR-128-3p	G-GCC2	TF-KLF4
miR-128-3p	G-GCC2	TF-SP1
miR-128-3p	G-NEK2	TF-RXRA
miR-128-3p	G-NEK2	TF-KLF5
miR-128-3p	G-NEK2	TF-KLF4
miR-128-3p	G-NEK2	TF-SP1
miR-128-3p	G-RAB22A	TF-ZNF552
miR-128-3p	G-RAB22A	TF-KLF5
miR-128-3p	G-RAB22A	TF-KLF4
miR-128-3p	G-RAB22A	TF-SP1
miR-522-5p	G-MTF1	TF-KDM5A
miR-32-5p	G-MTF1	TF-KLF4
miR-92b-3p	G-MTF1	TF-MYC
miR-92a-3p	G-MTF1	TF-KLF4
miR-92a-3p	G-MTF1	TF-GABPA
miR-92a-3p	G-MTF1	TF-MYC
G-HSPA1B	miR-3613-3p	TF-CEBPB
G-HSPA1B	miR-570-3p	TF-ETS1
miR-195-5p	G-HSPA1B	TF-RCOR1
miR-15b-5p	G-HSPA1B	TF-RCOR1
miR-15a-5p	G-HSPA1B	TF-ATF2
miR-15a-5p	G-HSPA1B	TF-RCOR1
miR-15a-5p	G-HSPA1B	TF-TP53
miR-34a-5p	G-HSPA1B	TF-CEBPB
miR-34a-5p	G-HSPA1B	TF-KLF4
miR-34a-5p	G-HSPA1B	TF-E2F1
miR-34a-5p	G-HSPA1B	TF-TP53
miR-34a-5p	G-HSPA1B	TF-MYC
miR-16-5p	G-HSPA1B	TF-NFIC
miR-16-5p	G-HSPA1B	TF-SP1
miR-16-5p	G-HSPA1B	TF-TP53
miR-16-5p	G-HSPA1B	TF-MYC
miR-335-5p	G-HSPA1B	TF-SREBF1
miR-335-5p	G-HSPA1B	TF-REST
miR-335-5p	G-HSPA1B	TF-FOXA2
miR-335-5p	G-HSPA1B	TF-FOS
miR-335-5p	G-HSPA1B	TF-ATF2
miR-335-5p	G-HSPA1B	TF-ETV1
miR-335-5p	G-HSPA1B	TF-KLF4
miR-335-5p	G-HSPA1B	TF-KDM5B
miR-335-5p	G-HSPA1B	TF-SP1
miR-335-5p	G-HSPA1B	TF-SPDEF
miR-335-5p	G-HSPA1B	TF-MYC
G-POLQ	miR-766-3p	TF-MBD3
G-POLQ	miR-766-3p	TF-KDM5B
miR-193b-3p	G-POLQ	TF-MAZ
miR-193b-3p	G-POLQ	TF-ELK3
miR-193b-3p	G-POLQ	TF-MAX
miR-192-5p	G-POLQ	TF-PPARG
miR-192-5p	G-POLQ	TF-FOXA1
miR-192-5p	G-POLQ	TF-CTCF
miR-155-5p	G-KDM3A	TF-NR3C1
miR-155-5p	G-KDM3A	TF-ZNF384
miR-155-5p	G-KDM3A	TF-CEBPB
miR-155-5p	G-KDM3A	TF-RCOR1
miR-155-5p	G-KDM3A	TF-ETS1
miR-155-5p	G-KDM3A	TF-SP1
let-7d-5p	G-KATNAL1	TF-E2F6
let-7e-5p	G-KATNAL1	TF-E2F6
miR-15a-5p	G-KATNAL1	TF-BHLHE40
miR-15a-5p	G-KATNAL1	TF-TP53
miR-103a-3p	G-KATNAL1	TF-KLF4
miR-218-5p	G-KATNAL1	TF-FOXP1
miR-218-5p	G-KATNAL1	TF-SNAI2
miR-218-5p	G-KATNAL1	TF-ARNT
miR-16-5p	G-KATNAL1	TF-BHLHE40
miR-16-5p	G-KATNAL1	TF-TBP
miR-16-5p	G-KATNAL1	TF-TP53
miR-218-5p	G-CBX8	TF-SNAI2
G-ADAM9	miR-373-3p	TF-RELA
miR-26b-5p	G-ADAM9	TF-MAFG
miR-26b-5p	G-ADAM9	TF-PBX3
miR-26b-5p	G-ADAM9	TF-FOXD2
miR-26b-5p	G-ADAM9	TF-RCOR1
miR-424-5p	G-SNTB2	TF-ELK4
miR-15b-5p	G-SNTB2	TF-ELK4
miR-15a-5p	G-SNTB2	TF-ELK4
miR-34a-5p	G-SNTB2	TF-BCLAF1
miR-34a-5p	G-SNTB2	TF-KLF4
miR-34a-5p	G-SNTB2	TF-E2F1
miR-34a-5p	G-SNTB2	TF-YY1
miR-34a-5p	G-SNTB2	TF-MYC
miR-155-5p	G-SNTB2	TF-ZNF384
miR-155-5p	G-SNTB2	TF-ETS1
miR-155-5p	G-SNTB2	TF-SP1
miR-16-5p	G-SNTB2	TF-ELK4
miR-16-5p	G-SNTB2	TF-SP1
miR-16-5p	G-SNTB2	TF-MYC
miR-16-5p	G-SBF1	TF-SP1
miR-22-3p	G-RGS2	TF-MAX
miR-22-3p	G-RGS2	TF-SP1
miR-22-3p	G-RBL1	TF-RCOR1
miR-22-3p	G-RBL1	TF-SP1
G-FOS	miR-221-3p	TF-ARNT
G-FOS	miR-221-3p	TF-CTCF
miR-222-3p	G-FOS	TF-MYC
miR-101-3p	G-FOS	TF-ZBTB7A
miR-7-5p	G-FOS	TF-RELA
miR-192-5p	G-FOS	TF-MYB
miR-192-5p	G-FOS	TF-SP4
miR-192-5p	G-FOS	TF-CTCF
miR-192-5p	G-FOS	TF-EGR1
miR-335-5p	G-FOS	TF-SP4
miR-335-5p	G-FOS	TF-BHLHE40
miR-335-5p	G-FOS	TF-NANOG
miR-335-5p	G-FOS	TF-BCL6
miR-335-5p	G-FOS	TF-HOXC6
miR-335-5p	G-FOS	TF-RARG
miR-335-5p	G-FOS	TF-CDX2
miR-335-5p	G-FOS	TF-ATF2
miR-335-5p	G-FOS	TF-ETV1
miR-335-5p	G-FOS	TF-KDM5A
miR-335-5p	G-FOS	TF-SPDEF
miR-335-5p	G-FOS	TF-MYC
miR-16-5p	G-TACO1	TF-ELK4
miR-16-5p	G-TACO1	TF-NFIC
miR-16-5p	G-TACO1	TF-TBP
miR-16-5p	G-TACO1	TF-MYC
miR-155-5p	G-SEPT11	TF-SMAD4
miR-155-5p	G-SEPT11	TF-TCF12
miR-155-5p	G-SEPT11	TF-STAT3
miR-155-5p	G-SEPT11	TF-CEBPB
miR-155-5p	G-SEPT11	TF-SPI1
miR-155-5p	G-SEPT11	TF-RCOR1
G-PTMA	miR-296-3p	TF-KDM5B
G-PTMA	miR-92a-1-5p	TF-MYC
G-PTMA	miR-206	TF-ESR1
miR-133a-3p	G-PTMA	TF-SP1
miR-1-3p	G-PTMA	TF-SRF
miR-192-5p	G-PHF10	TF-PPARG
miR-192-5p	G-PHF10	TF-MXI1
miR-192-5p	G-PHF10	TF-FOS
miR-192-5p	G-PHF10	TF-FOXA1
miR-192-5p	G-PHF10	TF-EGR1
miR-335-5p	G-NTN4	TF-ESR2
miR-335-5p	G-NTN4	TF-FOXA2
miR-335-5p	G-NTN4	TF-NANOG
miR-335-5p	G-NTN4	TF-CDX2
miR-143-3p	G-MMP2	TF-HNF4A
miR-29b-3p	G-MMP2	TF-MYC
miR-335-5p	G-MMP2	TF-CDX2
miR-335-5p	G-MMP2	TF-MYC
let-7a-5p	G-MED13L	TF-E2F6
let-7a-5p	G-MED13L	TF-MYC
let-7e-5p	G-MED13L	TF-E2F6
let-7e-5p	G-MED13L	TF-MYC
miR-98-5p	G-MED13L	TF-GATA6
miR-98-5p	G-MED13L	TF-TEAD4
miR-98-5p	G-MED13L	TF-E2F6
miR-98-5p	G-MED13L	TF-MYC
G-GGA3	miR-423-5p	TF-RUNX1
G-GGA3	miR-423-5p	TF-CREB1
let-7c-5p	G-GGA3	TF-SPDEF
let-7c-5p	G-GGA3	TF-MYC
let-7f-5p	G-GGA3	TF-MYC
let-7g-5p	G-GGA3	TF-MYC
let-7d-5p	G-GGA3	TF-MYC
let-7i-5p	G-GGA3	TF-MYC
let-7a-5p	G-GGA3	TF-MYC
miR-103a-3p	G-GGA3	TF-MYB
miR-98-5p	G-GGA3	TF-GATA6
miR-98-5p	G-GGA3	TF-MYC
let-7b-5p	G-GGA3	TF-GATA6
let-7b-5p	G-GGA3	TF-MYC
miR-26b-5p	G-GGA3	TF-ZNF84
miR-26b-5p	G-GGA3	TF-SP4
miR-26b-5p	G-GGA3	TF-FOXD2
G-FAM53C	miR-222-3p	TF-TFAP2A
G-FAM53C	miR-222-3p	TF-FOS
G-FAM53C	miR-222-3p	TF-MYC
miR-182-5p	G-RGS2	TF-SMAD4
miR-182-5p	G-RGS2	TF-CREB1
miR-182-5p	G-RGS2	TF-KDM5A
miR-203a-3p	G-RAB22A	TF-CREB1
miR-26b-5p	G-ZNF839	TF-ADNP
miR-26b-5p	G-ZNF839	TF-HSF1
miR-26b-5p	G-ZNF839	TF-FOXM1
miR-26b-5p	G-ZNF839	TF-GLI2
miR-92a-2-5p	G-ZFP36	TF-NFIC
miR-27a-3p	G-ZFP36	TF-PPARG
miR-27a-3p	G-ZFP36	TF-E2F7
miR-27a-3p	G-ZFP36	TF-SP1
miR-27a-3p	G-ZFP36	TF-TP53
miR-27b-3p	G-ZFP36	TF-E2F7
miR-27b-3p	G-ZFP36	TF-SP1
miR-29a-3p	G-ZFP36	TF-KLF4
miR-155-5p	G-ZFP36	TF-MYB
miR-155-5p	G-ZFP36	TF-TCF4
miR-155-5p	G-ZFP36	TF-ZNF384
miR-155-5p	G-ZFP36	TF-SMAD4
miR-155-5p	G-ZFP36	TF-TCF12
miR-155-5p	G-ZFP36	TF-STAT3
miR-155-5p	G-ZFP36	TF-CEBPB
miR-155-5p	G-ZFP36	TF-SPI1
miR-155-5p	G-ZFP36	TF-ETS1
miR-155-5p	G-ZFP36	TF-SP1
miR-335-5p	G-ZFP3	TF-EBF1
miR-335-5p	G-ZFP3	TF-BCL6
miR-335-5p	G-ZFP3	TF-MYOD1
miR-335-5p	G-ZFP3	TF-ZEB1
miR-335-5p	G-ZFP3	TF-CDX2
miR-335-5p	G-ZFP3	TF-ATF2
miR-335-5p	G-ZFP3	TF-ETV1
miR-335-5p	G-ZFP3	TF-KLF4
miR-335-5p	G-ZFP3	TF-SPDEF
miR-335-5p	G-ZCCHC6	TF-EHF
miR-335-5p	G-ZCCHC6	TF-FOS
miR-335-5p	G-ZCCHC6	TF-NANOG
miR-335-5p	G-ZCCHC6	TF-BCL6
miR-335-5p	G-ZCCHC6	TF-FOXD2
miR-335-5p	G-ZCCHC6	TF-RARG
miR-335-5p	G-ZCCHC6	TF-ZEB1
miR-335-5p	G-ZCCHC6	TF-KLF9
miR-335-5p	G-ZCCHC6	TF-CDX2
miR-335-5p	G-ZCCHC6	TF-ATF2
miR-335-5p	G-ZCCHC6	TF-ETV1
miR-335-5p	G-ZCCHC6	TF-KLF4
miR-335-5p	G-ZCCHC6	TF-KDM5A
miR-335-5p	G-ZCCHC6	TF-SP1
miR-335-5p	G-ZCCHC6	TF-SPDEF
miR-335-5p	G-ZCCHC6	TF-MYC
miR-218-5p	G-WDHD1	TF-LEF1
miR-218-5p	G-WDHD1	TF-KLF9
miR-218-5p	G-WDHD1	TF-ARNT
miR-26b-5p	G-WDHD1	TF-JUN
miR-26b-5p	G-WDHD1	TF-GATA2
miR-26b-5p	G-WDHD1	TF-RCOR1
miR-155-5p	G-VCAM1	TF-SPI1
miR-155-5p	G-VCAM1	TF-RCOR1
miR-98-5p	G-UTP20	TF-MITF
miR-98-5p	G-UTP20	TF-E2F6
miR-98-5p	G-UTP20	TF-MYC
miR-16-5p	G-UTP20	TF-BHLHE40
miR-16-5p	G-UTP20	TF-SP1
miR-16-5p	G-UTP20	TF-TP53
miR-16-5p	G-UTP20	TF-MYC
miR-26b-5p	G-UPF3B	TF-STAT6
miR-26b-5p	G-UPF3B	TF-SIX5
miR-26b-5p	G-UPF3B	TF-GATA2
miR-26b-5p	G-UPF3B	TF-SP4
miR-26b-5p	G-UPF3B	TF-TCF12
miR-26b-5p	G-UPF3B	TF-RCOR1
G-TUBGCP3	miR-483-3p	TF-SMAD4
miR-192-5p	G-TUBGCP3	TF-MXI1
miR-192-5p	G-TUBGCP3	TF-FOS
miR-192-5p	G-TUBGCP3	TF-EGR1
let-7b-5p	G-TUBGCP3	TF-GATA6
let-7b-5p	G-TUBGCP3	TF-ELK4
let-7b-5p	G-TUBGCP3	TF-SP1
let-7b-5p	G-TUBGCP3	TF-MYC
miR-335-5p	G-TF	TF-SREBF1
miR-335-5p	G-TF	TF-KDM5B
miR-335-5p	G-TF	TF-SPDEF
G-TMEM117	miR-16-2-3p	TF-MYC
miR-155-5p	G-TM6SF1	TF-ZNF384
miR-155-5p	G-TM6SF1	TF-RCOR1
miR-155-5p	G-TM6SF1	TF-SP1
miR-192-5p	G-TICRR	TF-ID1
miR-192-5p	G-TICRR	TF-PPARG
miR-192-5p	G-TICRR	TF-NFYA
miR-192-5p	G-TICRR	TF-FOS
miR-192-5p	G-TICRR	TF-EGR1
miR-34a-5p	G-TATDN2	TF-BCLAF1
miR-34a-5p	G-TATDN2	TF-KLF4
miR-34a-5p	G-TATDN2	TF-E2F1
miR-34a-5p	G-TATDN2	TF-YY1
miR-34a-5p	G-TATDN2	TF-MYC
miR-375	G-SYT15	TF-MBD2
miR-335-5p	G-SYNPO2	TF-SALL4
miR-335-5p	G-SYNPO2	TF-HOXA2
miR-335-5p	G-SYNPO2	TF-IRF2
miR-335-5p	G-SYNPO2	TF-NANOG
miR-335-5p	G-SYNPO2	TF-KDM5A
miR-335-5p	G-SYNPO2	TF-KDM5B
miR-92a-3p	G-STEAP3	TF-MYC
miR-98-5p	G-STEAP3	TF-E2F6
miR-98-5p	G-STEAP3	TF-MYC
miR-16-5p	G-STEAP3	TF-MYB
miR-16-5p	G-STEAP3	TF-BHLHE40
miR-16-5p	G-STEAP3	TF-TP53
miR-16-5p	G-STEAP3	TF-MYC
miR-335-5p	G-SRL	TF-MAFF
miR-335-5p	G-SRL	TF-USF2
miR-335-5p	G-SRL	TF-MYOD1
miR-335-5p	G-SRL	TF-CDX2
miR-335-5p	G-SRL	TF-SPDEF
miR-335-5p	G-SPTB	TF-FOXD2
miR-335-5p	G-SPTB	TF-ZEB1
miR-335-5p	G-SPTB	TF-KLF9
miR-335-5p	G-SPTB	TF-KDM5B
miR-335-5p	G-SPTB	TF-SP1
miR-335-5p	G-SPTB	TF-SPDEF
miR-335-5p	G-SPIC	TF-JUND
miR-335-5p	G-SPIC	TF-FOXA2
miR-1-3p	G-SPC24	TF-GLI2
miR-1-3p	G-SPC24	TF-SRF
miR-1-3p	G-SPC24	TF-UBTF
miR-335-5p	G-SORBS2	TF-NANOG
miR-10b-5p	G-SNX4	TF-TFAP2C
miR-10b-5p	G-SNX4	TF-KLF4
miR-10b-5p	G-SNX4	TF-TP53
miR-10a-5p	G-SNX4	TF-TFAP2C
miR-222-3p	G-SNX4	TF-MYC
miR-218-5p	G-SNX4	TF-SNAI2
miR-124-3p	G-SMPD4	TF-MAZ
miR-124-3p	G-SMPD4	TF-NRF1
miR-124-3p	G-SMPD4	TF-EGR2
miR-124-3p	G-SMPD4	TF-BCL6
miR-124-3p	G-SMPD4	TF-SNAI2
miR-124-3p	G-SMPD4	TF-STAT3
miR-124-3p	G-SMPD4	TF-STAT5A
miR-124-3p	G-SMPD4	TF-KLF4
miR-124-3p	G-SMPD4	TF-EGR1
miR-16-5p	G-SMPD4	TF-BHLHE40
miR-16-5p	G-SMPD4	TF-TBP
miR-16-5p	G-SMPD4	TF-TP53
miR-16-5p	G-SMPD4	TF-MYC
miR-92a-3p	G-SLC25A38	TF-CUX1
miR-92a-3p	G-SLC25A38	TF-GABPA
miR-92a-3p	G-SLC25A38	TF-MYC
miR-335-5p	G-SIGLEC5	TF-KLF9
miR-1-3p	G-SH2D4A	TF-GATA3
miR-1-3p	G-SH2D4A	TF-SRF
miR-335-5p	G-SH2D3C	TF-USF2
miR-335-5p	G-SH2D3C	TF-BHLHE40
miR-335-5p	G-SH2D3C	TF-BCL6
miR-335-5p	G-SH2D3C	TF-MYOD1
miR-335-5p	G-SH2D3C	TF-ZEB1
miR-335-5p	G-SH2D3C	TF-KLF9
miR-335-5p	G-SH2D3C	TF-SPDEF
miR-335-5p	G-SH2D3C	TF-MYC
miR-103a-3p	G-SF3A3	TF-ELK4
miR-16-5p	G-SF3A3	TF-HOXA10
miR-16-5p	G-SF3A3	TF-BHLHE40
miR-16-5p	G-SF3A3	TF-ELK4
miR-16-5p	G-SF3A3	TF-NFIC
miR-16-5p	G-SF3A3	TF-TBP
miR-16-5p	G-SF3A3	TF-MYC
miR-335-5p	G-SERPINB10	TF-FOXA2
miR-335-5p	G-SERPINB10	TF-EBF1
miR-335-5p	G-SERPINB10	TF-CDX2
miR-192-5p	G-SCRN3	TF-MXI1
miR-192-5p	G-SCRN3	TF-FOXA1
miR-155-5p	G-SAP30L	TF-MYBL1
miR-155-5p	G-SAP30L	TF-STAT3
miR-155-5p	G-SAP30L	TF-SPI1
miR-155-5p	G-SAP30L	TF-RCOR1
miR-155-5p	G-SAP30L	TF-ETS1
miR-155-5p	G-SAP30L	TF-SP1
miR-98-5p	G-S100A8	TF-TFAP2A
miR-98-5p	G-S100A8	TF-MYC
miR-16-5p	G-RRP9	TF-BHLHE40
miR-16-5p	G-RRP9	TF-ELK4
miR-16-5p	G-RRP9	TF-TBP
miR-16-5p	G-RRP9	TF-SP1
miR-16-5p	G-RRP9	TF-TP53
miR-16-5p	G-RRP9	TF-MYC
miR-29a-3p	G-RNASEL	TF-HBP1
miR-29a-3p	G-RNASEL	TF-KDM5B
miR-192-5p	G-RNASEL	TF-MXI1
miR-192-5p	G-RNASEL	TF-FOS
miR-192-5p	G-RNASEL	TF-FOXA1
miR-192-5p	G-RNASEL	TF-EGR1
miR-335-5p	G-RNASEL	TF-HOXA2
miR-335-5p	G-RNASEL	TF-BACH2
miR-335-5p	G-RNASEL	TF-HBP1
miR-335-5p	G-RNASEL	TF-USF2
miR-335-5p	G-RNASEL	TF-MXI1
miR-335-5p	G-RNASEL	TF-FOS
miR-335-5p	G-RNASEL	TF-NANOG
miR-335-5p	G-RNASEL	TF-ETV1
miR-335-5p	G-RNASEL	TF-KDM5A
miR-335-5p	G-RNASEL	TF-KDM5B
miR-335-5p	G-RNASEL	TF-SPDEF
miR-335-5p	G-RNASEL	TF-MYC
miR-124-3p	G-RIPK4	TF-NRF1
miR-124-3p	G-RIPK4	TF-SNAI2
miR-124-3p	G-RIPK4	TF-KLF9
miR-124-3p	G-RIPK4	TF-KLF4
miR-124-3p	G-RIPK4	TF-SP1
miR-26b-5p	G-RIPK4	TF-TCF12
miR-335-5p	G-RGS7BP	TF-USF2
miR-335-5p	G-RGS7BP	TF-SPDEF
G-RGS2	miR-96-5p	TF-KDM5A
miR-101-3p	G-REL	TF-ZBTB7A
miR-29b-3p	G-REL	TF-SP1
miR-29c-3p	G-REL	TF-KLF4
miR-29c-3p	G-REL	TF-KDM5B
miR-29c-3p	G-REL	TF-SP1
miR-7-5p	G-REL	TF-RELA
miR-29a-3p	G-REL	TF-KLF4
miR-29a-3p	G-REL	TF-KDM5B
miR-98-5p	G-REL	TF-AHR
miR-98-5p	G-REL	TF-TEAD1
miR-98-5p	G-REL	TF-E2F4
miR-335-5p	G-RCVRN	TF-USF2
miR-335-5p	G-RCVRN	TF-SPDEF
miR-335-5p	G-RCVRN	TF-MYC
miR-186-5p	G-RBM10	TF-SP1
miR-186-5p	G-RBM10	TF-YY1
miR-92b-3p	G-RBM10	TF-MYC
miR-92a-3p	G-RBM10	TF-GABPA
miR-92a-3p	G-RBM10	TF-MYC
miR-335-5p	G-PTPN7	TF-JUND
miR-335-5p	G-PTPN7	TF-GATA1
miR-335-5p	G-PTPN7	TF-BHLHE40
miR-335-5p	G-PTPN7	TF-MYOD1
miR-335-5p	G-PTPN7	TF-ATF2
miR-335-5p	G-PTPN7	TF-KDM5B
miR-335-5p	G-PTPN7	TF-SPDEF
miR-10a-5p	G-PSMD13	TF-TFAP2C
miR-124-3p	G-PRSS50	TF-KLF9
miR-124-3p	G-PRSS50	TF-E2F6
miR-124-3p	G-PRSS50	TF-KLF4
miR-124-3p	G-PRSS50	TF-SP1
miR-124-3p	G-PRSS50	TF-EGR1
miR-335-5p	G-PRG3	TF-KLF4
miR-335-5p	G-PRG3	TF-KDM5A
miR-335-5p	G-PRDM11	TF-NANOG
miR-335-5p	G-PRDM11	TF-SPDEF
miR-98-5p	G-PPAN	TF-ZBED4
miR-98-5p	G-PPAN	TF-ARID3A
miR-98-5p	G-PPAN	TF-MYC
miR-124-3p	G-PPAN	TF-RFX2
miR-124-3p	G-PPAN	TF-TFAP4
miR-124-3p	G-PPAN	TF-SP3
miR-124-3p	G-PPAN	TF-TP63
miR-124-3p	G-PPAN	TF-NRF1
miR-124-3p	G-PPAN	TF-ELK3
miR-124-3p	G-PPAN	TF-EGR2
miR-124-3p	G-PPAN	TF-SNAI2
miR-124-3p	G-PPAN	TF-RARG
miR-124-3p	G-PPAN	TF-STAT3
miR-124-3p	G-PPAN	TF-RELA
miR-124-3p	G-PPAN	TF-SP1
miR-124-3p	G-PPAN	TF-EGR1
miR-16-5p	G-PPAN	TF-TFAP4
miR-16-5p	G-PPAN	TF-BHLHE40
miR-16-5p	G-PPAN	TF-ELK4
miR-16-5p	G-PPAN	TF-SP1
miR-16-5p	G-PPAN	TF-TP53
miR-16-5p	G-PPAN	TF-MYC
miR-7-5p	G-POLE3	TF-RELA
miR-155-5p	G-POLE3	TF-SMAD1
miR-155-5p	G-POLE3	TF-ZNF384
miR-155-5p	G-POLE3	TF-TCF12
miR-155-5p	G-POLE3	TF-STAT3
miR-155-5p	G-POLE3	TF-CEBPB
miR-155-5p	G-POLE3	TF-ETS1
miR-155-5p	G-POLE3	TF-SP1
miR-26b-5p	G-POLE3	TF-SMAD1
miR-26b-5p	G-POLE3	TF-ZNF84
miR-26b-5p	G-POLE3	TF-ATF3
miR-26b-5p	G-POLE3	TF-E2F7
miR-26b-5p	G-POLE3	TF-MXI1
miR-26b-5p	G-POLE3	TF-FOXD2
miR-26b-5p	G-POLE3	TF-TCF12
miR-193b-3p	G-POLE2	TF-E2F1
miR-124-3p	G-PLXNA2	TF-HOXC9
miR-124-3p	G-PLXNA2	TF-GATA6
miR-124-3p	G-PLXNA2	TF-ELK3
miR-124-3p	G-PLXNA2	TF-EGR2
miR-124-3p	G-PLXNA2	TF-BCL6
miR-124-3p	G-PLXNA2	TF-SNAI2
miR-124-3p	G-PLXNA2	TF-RELA
miR-124-3p	G-PLXNA2	TF-EGR1
miR-26b-5p	G-PLXNA2	TF-GATA2
miR-26b-5p	G-PLXNA2	TF-SRF
miR-25-3p	G-PDZD8	TF-KLF4
miR-25-3p	G-PDZD8	TF-MYC
G-PDZD8	miR-130b-3p	TF-RUNX3
G-PDZD8	miR-130b-3p	TF-SMAD4
G-PDZD8	miR-130b-3p	TF-ZBTB7A
G-PDZD8	miR-130b-3p	TF-E2F1
miR-32-5p	G-PDZD8	TF-KLF4
miR-107	G-PDZD8	TF-KLF4
let-7a-5p	G-PDZD8	TF-E2F6
let-7a-5p	G-PDZD8	TF-MYC
miR-103a-3p	G-PDZD8	TF-KLF4
miR-92a-3p	G-PDZD8	TF-KLF4
miR-92a-3p	G-PDZD8	TF-MYC
miR-218-5p	G-PDZD8	TF-SP3
miR-218-5p	G-PDZD8	TF-RUNX3
miR-218-5p	G-PDZD8	TF-ARNT
miR-335-5p	G-PDZD8	TF-ESR2
miR-335-5p	G-PDZD8	TF-USF2
miR-335-5p	G-PDZD8	TF-EHF
miR-335-5p	G-PDZD8	TF-FOXD2
miR-335-5p	G-PDZD8	TF-HOXC6
miR-335-5p	G-PDZD8	TF-RARG
miR-335-5p	G-PDZD8	TF-CDX2
miR-335-5p	G-PDZD8	TF-ETV1
miR-335-5p	G-PDZD8	TF-KLF4
miR-335-5p	G-PDZD8	TF-KDM5B
miR-335-5p	G-PDZD8	TF-SPDEF
miR-335-5p	G-PDZD8	TF-MYC
miR-192-5p	G-PASK	TF-NFYA
miR-192-5p	G-PASK	TF-SP4
miR-192-5p	G-PASK	TF-FOS
miR-192-5p	G-PASK	TF-CTCF
miR-192-5p	G-PASK	TF-EGR1
let-7b-5p	G-PAPSS1	TF-SP1
let-7b-5p	G-PAPSS1	TF-MYC
miR-192-5p	G-ORC1	TF-PPARG
miR-192-5p	G-ORC1	TF-SP4
miR-192-5p	G-ORC1	TF-FOXA1
miR-192-5p	G-ORC1	TF-CTCF
miR-192-5p	G-ORC1	TF-EGR1
miR-124-3p	G-ORC1	TF-NR3C1
miR-124-3p	G-ORC1	TF-CEBPA
miR-124-3p	G-ORC1	TF-ELK3
miR-124-3p	G-ORC1	TF-BCL6
miR-124-3p	G-ORC1	TF-KLF9
miR-124-3p	G-ORC1	TF-E2F4
miR-124-3p	G-ORC1	TF-STAT3
miR-124-3p	G-ORC1	TF-NFIC
miR-124-3p	G-ORC1	TF-STAT5A
miR-124-3p	G-ORC1	TF-RELA
miR-124-3p	G-ORC1	TF-SP1
miR-124-3p	G-ORC1	TF-EGR1
miR-9-5p	G-OPTN	TF-SRF
miR-9-5p	G-OPTN	TF-SNAI2
miR-9-5p	G-OPTN	TF-KLF5
miR-335-5p	G-OPTN	TF-TFAP4
miR-335-5p	G-OPTN	TF-EHF
miR-335-5p	G-OPTN	TF-FOXD2
miR-335-5p	G-OPTN	TF-ZEB1
miR-335-5p	G-OPTN	TF-KLF9
miR-335-5p	G-OPTN	TF-ATF2
miR-335-5p	G-OPTN	TF-KLF4
miR-335-5p	G-OPTN	TF-KDM5B
miR-335-5p	G-OPTN	TF-SP1
miR-335-5p	G-OPTN	TF-MYC
miR-146a-5p	G-OASL	TF-STAT1
miR-1-3p	G-OASL	TF-PPARG
miR-124-3p	G-OASL	TF-MBD3
miR-124-3p	G-OASL	TF-KLF4
miR-124-3p	G-OASL	TF-EGR1
miR-124-3p	G-NUPR1	TF-CEBPA
miR-124-3p	G-NUPR1	TF-NFIC
miR-335-5p	G-NUPR1	TF-ATF2
miR-335-5p	G-NUPR1	TF-KDM5B
miR-335-5p	G-NUPR1	TF-SPDEF
miR-335-5p	G-NRK	TF-SPDEF
miR-335-5p	G-NLRP1	TF-MAFF
miR-335-5p	G-NLRP1	TF-JUND
miR-335-5p	G-NLRP1	TF-CDX2
miR-335-5p	G-NLRP1	TF-KDM5B
miR-335-5p	G-NLRP1	TF-MYC
miR-335-5p	G-NLRP10	TF-JUND
miR-335-5p	G-NLRP10	TF-FOS
miR-335-5p	G-NLRP10	TF-KLF4
miR-335-5p	G-NKG7	TF-USF2
miR-335-5p	G-NKG7	TF-BHLHE40
miR-335-5p	G-NKG7	TF-ATF2
miR-335-5p	G-NKG7	TF-SPDEF
miR-192-5p	G-NEIL3	TF-FOXA1
miR-192-5p	G-NEIL3	TF-EGR1
miR-7-5p	G-NDC1	TF-MAZ
miR-7-5p	G-NDC1	TF-RELA
miR-335-5p	G-NCF4	TF-MEF2A
miR-335-5p	G-NCF4	TF-BCL6
miR-335-5p	G-NCF4	TF-ZEB1
miR-335-5p	G-NCF4	TF-ATF2
miR-335-5p	G-NCF4	TF-MYC
miR-193b-3p	G-NCAPH	TF-E2F1
miR-192-5p	G-NCAPH	TF-NFYA
miR-192-5p	G-NCAPH	TF-FOXA1
miR-192-5p	G-NCAPH	TF-EGR1
G-MYH10	miR-200a-3p	TF-ZEB1
miR-1-3p	G-MXD4	TF-GLI2
miR-124-3p	G-MXD4	TF-ELK3
miR-124-3p	G-MXD4	TF-BCL6
miR-124-3p	G-MXD4	TF-E2F4
miR-124-3p	G-MXD4	TF-STAT3
miR-124-3p	G-MXD4	TF-E2F6
miR-124-3p	G-MXD4	TF-SP1
miR-124-3p	G-MXD4	TF-EGR1
miR-335-5p	G-MXD4	TF-FOXA2
miR-335-5p	G-MXD4	TF-MXI1
miR-335-5p	G-MXD4	TF-FOS
miR-335-5p	G-MXD4	TF-BHLHE40
miR-335-5p	G-MXD4	TF-BCL6
miR-335-5p	G-MXD4	TF-KDM5B
miR-335-5p	G-MXD4	TF-SP1
miR-335-5p	G-MXD4	TF-MYC
miR-155-5p	G-MTFMT	TF-SPI1
miR-155-5p	G-MTFMT	TF-RCOR1
miR-193b-3p	G-MND1	TF-E2F6
miR-193b-3p	G-MND1	TF-MAX
miR-193b-3p	G-MND1	TF-E2F1
miR-155-5p	G-MECR	TF-ESRRA
miR-155-5p	G-MECR	TF-SMAD2
miR-155-5p	G-MECR	TF-TCF4
miR-155-5p	G-MECR	TF-SMAD4
miR-155-5p	G-MECR	TF-RCOR1
miR-155-5p	G-MECR	TF-ETS1
miR-155-5p	G-MECR	TF-SP1
miR-335-5p	G-LRRC75A	TF-ZEB1
miR-335-5p	G-LRRC75A	TF-KLF9
miR-335-5p	G-LRRC75A	TF-CDX2
miR-335-5p	G-LRRC75A	TF-ETV1
miR-335-5p	G-LRRC75A	TF-KDM5A
miR-335-5p	G-LRRC75A	TF-SPDEF
miR-335-5p	G-LRRC75A	TF-MYC
miR-335-5p	G-KLRB1	TF-KDM5A
miR-335-5p	G-KLHL17	TF-BHLHE40
miR-335-5p	G-KLHL17	TF-MYOD1
miR-335-5p	G-KLHL17	TF-KLF9
miR-335-5p	G-KLHL17	TF-SP1
miR-335-5p	G-KLHL17	TF-MYC
miR-375	G-KLHDC8B	TF-TCF12
miR-375	G-KLHDC8B	TF-MYC
let-7f-5p	G-KLHDC8B	TF-E2F6
let-7f-5p	G-KLHDC8B	TF-SP1
let-7f-5p	G-KLHDC8B	TF-MYC
let-7g-5p	G-KLHDC8B	TF-E2F6
let-7g-5p	G-KLHDC8B	TF-MYC
let-7d-5p	G-KLHDC8B	TF-E2F6
let-7d-5p	G-KLHDC8B	TF-MYC
let-7i-5p	G-KLHDC8B	TF-E2F6
let-7i-5p	G-KLHDC8B	TF-KDM5B
let-7i-5p	G-KLHDC8B	TF-MYC
let-7a-5p	G-KLHDC8B	TF-E2F6
let-7a-5p	G-KLHDC8B	TF-SP1
let-7a-5p	G-KLHDC8B	TF-MYC
let-7e-5p	G-KLHDC8B	TF-E2F6
let-7e-5p	G-KLHDC8B	TF-MYC
miR-98-5p	G-KLHDC8B	TF-TEAD4
miR-98-5p	G-KLHDC8B	TF-E2F6
miR-98-5p	G-KLHDC8B	TF-MYC
let-7b-5p	G-KLHDC8B	TF-NCOR1
let-7b-5p	G-KLHDC8B	TF-E2F6
let-7b-5p	G-KLHDC8B	TF-SP1
let-7b-5p	G-KLHDC8B	TF-MYC
miR-92a-3p	G-KLF2	TF-MYC
miR-124-3p	G-KLF2	TF-EGR2
miR-124-3p	G-KLF2	TF-KLF9
miR-124-3p	G-KLF2	TF-SP1
miR-124-3p	G-KLF2	TF-EGR1
miR-16-5p	G-KIN	TF-TFAP4
miR-16-5p	G-KIN	TF-MYB
miR-16-5p	G-KIN	TF-ELK4
miR-16-5p	G-KIN	TF-SP1
miR-16-5p	G-KIN	TF-TP53
miR-16-5p	G-KIN	TF-MYC
miR-146a-5p	G-KIF22	TF-SMAD4
miR-193b-3p	G-KIF22	TF-ELK3
miR-193b-3p	G-KIF22	TF-E2F1
miR-155-5p	G-KIF22	TF-TCF4
miR-155-5p	G-KIF22	TF-SMAD4
miR-155-5p	G-KIF22	TF-RCOR1
miR-155-5p	G-KIF22	TF-ETS1
miR-155-5p	G-KIF22	TF-SP1
G-KIF18B	miR-196a-5p	TF-MYC
miR-193b-3p	G-KIF15	TF-MYB
miR-193b-3p	G-KIF15	TF-E2F1
miR-218-5p	G-KIF15	TF-KLF9
miR-218-5p	G-KIF15	TF-ARNT
miR-192-5p	G-KIF15	TF-ATF1
miR-192-5p	G-KIF15	TF-MYB
miR-192-5p	G-KIF15	TF-EGR1
miR-335-5p	G-KDM4B	TF-USF2
miR-335-5p	G-KDM4B	TF-GATA1
miR-335-5p	G-KDM4B	TF-MXI1
miR-335-5p	G-KDM4B	TF-SP4
miR-335-5p	G-KDM4B	TF-FOS
miR-335-5p	G-KDM4B	TF-BHLHE40
miR-335-5p	G-KDM4B	TF-MYOD1
miR-335-5p	G-KDM4B	TF-HOXC6
miR-335-5p	G-KDM4B	TF-CDX2
miR-335-5p	G-KDM4B	TF-KLF4
miR-335-5p	G-KDM4B	TF-SP1
miR-335-5p	G-KDM4B	TF-SPDEF
miR-335-5p	G-KDM4B	TF-MYC
miR-155-5p	G-JUNB	TF-MYB
miR-155-5p	G-JUNB	TF-NR3C1
miR-155-5p	G-JUNB	TF-TCF12
miR-155-5p	G-JUNB	TF-ETS1
miR-26b-5p	G-JAM2	TF-SRF
miR-26b-5p	G-JAM2	TF-RCOR1
miR-335-5p	G-IRAK2	TF-GATA1
miR-335-5p	G-IRAK2	TF-SP4
miR-335-5p	G-IRAK2	TF-FOXD2
miR-335-5p	G-IRAK2	TF-ZEB1
miR-335-5p	G-IRAK2	TF-KLF9
miR-335-5p	G-IRAK2	TF-SP1
miR-335-5p	G-IRAK2	TF-SPDEF
miR-26b-5p	G-INPP5B	TF-BATF
miR-26b-5p	G-INPP5B	TF-SIX5
miR-26b-5p	G-INPP5B	TF-MXI1
miR-26b-5p	G-INPP5B	TF-SP4
miR-26b-5p	G-INPP5B	TF-RCOR1
miR-340-5p	G-INIP	TF-ZNF281
miR-340-5p	G-INIP	TF-ZFHX3
miR-340-5p	G-INIP	TF-YY1
miR-192-5p	G-INIP	TF-MYB
miR-192-5p	G-INIP	TF-SP4
miR-192-5p	G-INIP	TF-FOXA1
miR-192-5p	G-INIP	TF-CTCF
miR-192-5p	G-INIP	TF-EGR1
miR-7-5p	G-IGFBP4	TF-FOS
miR-7-5p	G-IGFBP4	TF-GATA6
miR-124-3p	G-IGFBP4	TF-CEBPA
miR-124-3p	G-IGFBP4	TF-GATA6
miR-124-3p	G-IGFBP4	TF-KLF9
miR-124-3p	G-IGFBP4	TF-NFIC
miR-124-3p	G-IGFBP4	TF-STAT5A
miR-124-3p	G-IGFBP4	TF-SP1
miR-124-3p	G-IGFBP4	TF-EGR1
miR-26b-5p	G-IGFBP4	TF-FOXM1
miR-26b-5p	G-IGFBP4	TF-SRF
miR-26b-5p	G-IGFBP4	TF-RCOR1
miR-335-5p	G-IGFBP4	TF-MAFF
miR-335-5p	G-IGFBP4	TF-ZMIZ1
miR-335-5p	G-IGFBP4	TF-EBF1
miR-335-5p	G-IGFBP4	TF-EHF
miR-335-5p	G-IGFBP4	TF-FOS
miR-335-5p	G-IGFBP4	TF-KLF9
miR-335-5p	G-IGFBP4	TF-KDM5A
miR-335-5p	G-IGFBP4	TF-KDM5B
miR-335-5p	G-IGFBP4	TF-SP1
miR-335-5p	G-IGFBP4	TF-SPDEF
miR-335-5p	G-IGFBP4	TF-MYC
let-7f-5p	G-ICOSLG	TF-SP1
let-7f-5p	G-ICOSLG	TF-MYC
let-7g-5p	G-ICOSLG	TF-MYC
let-7d-5p	G-ICOSLG	TF-MYC
let-7i-5p	G-ICOSLG	TF-MYC
let-7a-5p	G-ICOSLG	TF-SP1
let-7a-5p	G-ICOSLG	TF-MYC
let-7e-5p	G-ICOSLG	TF-MYC
miR-98-5p	G-ICOSLG	TF-PBX3
miR-98-5p	G-ICOSLG	TF-MYC
let-7b-5p	G-ICOSLG	TF-SP1
let-7b-5p	G-ICOSLG	TF-MYC
miR-26b-5p	G-ICE1	TF-E2F7
miR-26b-5p	G-ICE1	TF-GATA2
miR-26b-5p	G-ICE1	TF-TCF12
miR-192-5p	G-HOXB9	TF-E2F8
miR-192-5p	G-HOXB9	TF-EGR1
miR-423-5p	G-HIST1H1C	TF-CEBPB
miR-423-5p	G-HIST1H1C	TF-CREB1
miR-423-5p	G-HIST1H1C	TF-SP1
miR-27b-3p	G-HIST1H1C	TF-CREB1
miR-27b-3p	G-HIST1H1C	TF-SP1
miR-34a-5p	G-HIST1H1C	TF-MYB
miR-34a-5p	G-HIST1H1C	TF-SMAD4
miR-34a-5p	G-HIST1H1C	TF-CEBPB
miR-34a-5p	G-HIST1H1C	TF-E2F1
miR-34a-5p	G-HIST1H1C	TF-TP53
miR-16-5p	G-HIST1H1C	TF-MYB
miR-16-5p	G-HIST1H1C	TF-NFIC
miR-16-5p	G-HIST1H1C	TF-SP1
miR-16-5p	G-HIST1H1C	TF-TP53
let-7b-5p	G-GTPBP3	TF-GATA6
miR-26b-5p	G-GPR183	TF-BATF
miR-26b-5p	G-GPR183	TF-SMAD1
miR-26b-5p	G-GPR183	TF-JUN
miR-26b-5p	G-GPR183	TF-PBX3
miR-26b-5p	G-GPR183	TF-GATA2
miR-26b-5p	G-GPR183	TF-RCOR1
miR-335-5p	G-HECTD4	TF-ESR2
miR-335-5p	G-HECTD4	TF-SP4
miR-335-5p	G-HECTD4	TF-HOXC6
miR-335-5p	G-HECTD4	TF-ZEB1
miR-335-5p	G-HECTD4	TF-KLF9
miR-335-5p	G-HECTD4	TF-CDX2
miR-335-5p	G-HECTD4	TF-ATF2
miR-335-5p	G-HECTD4	TF-KLF4
miR-335-5p	G-HECTD4	TF-KDM5A
miR-335-5p	G-HECTD4	TF-SP1
miR-335-5p	G-HECTD4	TF-SPDEF
miR-335-5p	G-GIPC2	TF-STAT6
miR-335-5p	G-GIPC2	TF-EHF
miR-335-5p	G-GIPC2	TF-HOXC6
miR-335-5p	G-GIPC2	TF-CDX2
miR-335-5p	G-GIPC2	TF-ATF2
miR-335-5p	G-GIPC2	TF-ETV1
miR-335-5p	G-GIPC2	TF-KLF4
miR-335-5p	G-GIPC2	TF-KDM5A
miR-335-5p	G-GIPC2	TF-KDM5B
miR-335-5p	G-GIPC2	TF-MYC
miR-124-3p	G-GDA	TF-E2F6
miR-335-5p	G-GATA1	TF-GATA1
miR-335-5p	G-GATA1	TF-KLF9
miR-335-5p	G-GATA1	TF-MYC
miR-124-3p	G-FXN	TF-MAZ
miR-124-3p	G-FXN	TF-NR3C1
miR-124-3p	G-FXN	TF-TP63
miR-124-3p	G-FXN	TF-NRF1
miR-124-3p	G-FXN	TF-ELK3
miR-124-3p	G-FXN	TF-BCL6
miR-124-3p	G-FXN	TF-E2F6
miR-124-3p	G-FXN	TF-STAT5A
miR-124-3p	G-FXN	TF-KLF4
miR-124-3p	G-FXN	TF-RELA
miR-124-3p	G-FXN	TF-EGR1
miR-335-5p	G-FLT3	TF-REST
miR-335-5p	G-FLT3	TF-EBF1
miR-335-5p	G-FLT3	TF-USF2
miR-335-5p	G-FLT3	TF-SP4
miR-335-5p	G-FLT3	TF-NANOG
miR-335-5p	G-FLT3	TF-ZEB1
miR-335-5p	G-FLT3	TF-KLF4
miR-335-5p	G-FLT3	TF-KDM5B
miR-335-5p	G-FLT3	TF-SPDEF
miR-335-5p	G-FLT3	TF-MYC
miR-26b-5p	G-FAM193A	TF-SIX5
miR-26b-5p	G-FAM193A	TF-E2F7
miR-26b-5p	G-FAM193A	TF-SP4
miR-26b-5p	G-FAM193A	TF-FOXD2
miR-26b-5p	G-FAM193A	TF-TCF12
miR-26b-5p	G-FAM193A	TF-RCOR1
miR-26b-5p	G-FAHD2A	TF-SRF
miR-26b-5p	G-FAHD2A	TF-FOXD2
miR-26b-5p	G-FAHD2A	TF-TCF12
let-7e-5p	G-EIF3J	TF-E2F6
let-7e-5p	G-EIF3J	TF-MYC
miR-98-5p	G-EIF3J	TF-E2F6
miR-98-5p	G-EIF3J	TF-MYC
miR-155-5p	G-EIF3J	TF-JUNB
miR-155-5p	G-EIF3J	TF-MYB
miR-155-5p	G-EIF3J	TF-ZNF384
miR-155-5p	G-EIF3J	TF-SMAD4
miR-155-5p	G-EIF3J	TF-TCF12
miR-155-5p	G-EIF3J	TF-STAT3
miR-155-5p	G-EIF3J	TF-RCOR1
miR-155-5p	G-EIF3J	TF-ETS1
miR-155-5p	G-EIF3J	TF-SP1
miR-7-5p	G-EHD3	TF-RELA
G-EGR1	miR-191-5p	TF-EGR1
G-EGR1	miR-183-5p	TF-EGR1
miR-192-5p	G-EGR1	TF-MYB
miR-192-5p	G-EGR1	TF-CTCF
miR-192-5p	G-EGR1	TF-EGR1
miR-124-3p	G-EGR1	TF-TFAP4
miR-124-3p	G-EGR1	TF-EGR2
miR-124-3p	G-EGR1	TF-BCL6
miR-124-3p	G-EGR1	TF-E2F6
miR-124-3p	G-EGR1	TF-NFIC
miR-124-3p	G-EGR1	TF-STAT5A
miR-124-3p	G-EGR1	TF-RELA
miR-124-3p	G-EGR1	TF-EGR1
miR-335-5p	G-RNASE2	TF-KDM5A
miR-335-5p	G-RNASE2	TF-MYC
miR-155-5p	G-DYNC2H1	TF-CEBPB
miR-155-5p	G-DYNC2H1	TF-SPI1
miR-155-5p	G-DYNC2H1	TF-RCOR1
miR-124-3p	G-DYNC2H1	TF-RFX2
miR-124-3p	G-DYNC2H1	TF-CEBPA
miR-124-3p	G-DYNC2H1	TF-GATA6
miR-124-3p	G-DYNC2H1	TF-NRF1
miR-124-3p	G-DYNC2H1	TF-BCL6
miR-124-3p	G-DYNC2H1	TF-KLF9
miR-124-3p	G-DYNC2H1	TF-E2F6
miR-124-3p	G-DYNC2H1	TF-KLF4
miR-124-3p	G-DYNC2H1	TF-EGR1
G-DUSP1	miR-200c-3p	TF-ETS1
let-7c-5p	G-DUSP1	TF-E2F6
let-7c-5p	G-DUSP1	TF-MYC
let-7f-5p	G-DUSP1	TF-E2F6
let-7f-5p	G-DUSP1	TF-MYC
let-7g-5p	G-DUSP1	TF-E2F6
let-7g-5p	G-DUSP1	TF-MYC
miR-101-3p	G-DUSP1	TF-TFAP4
miR-101-3p	G-DUSP1	TF-NR2F2
miR-101-3p	G-DUSP1	TF-ZBTB7A
let-7i-5p	G-DUSP1	TF-E2F6
let-7i-5p	G-DUSP1	TF-KDM5B
let-7i-5p	G-DUSP1	TF-MYC
let-7a-5p	G-DUSP1	TF-STAT3
let-7a-5p	G-DUSP1	TF-E2F6
let-7a-5p	G-DUSP1	TF-MYC
let-7e-5p	G-DUSP1	TF-E2F6
let-7e-5p	G-DUSP1	TF-MYC
miR-98-5p	G-DUSP1	TF-NFKB2
miR-98-5p	G-DUSP1	TF-TEAD4
miR-98-5p	G-DUSP1	TF-E2F6
miR-98-5p	G-DUSP1	TF-MYC
let-7b-5p	G-DUSP1	TF-E2F6
let-7b-5p	G-DUSP1	TF-MYC
miR-26b-5p	G-DUSP1	TF-SMAD1
miR-26b-5p	G-DUSP1	TF-ATF3
miR-26b-5p	G-DUSP1	TF-SRF
miR-26b-5p	G-DUSP1	TF-RCOR1
miR-26a-5p	G-DNMBP	TF-RCOR1
miR-26a-5p	G-DNMBP	TF-MYC
miR-124-3p	G-DNMBP	TF-MAZ
miR-124-3p	G-DNMBP	TF-TP63
miR-124-3p	G-DNMBP	TF-NRF1
miR-124-3p	G-DNMBP	TF-E2F4
miR-124-3p	G-DNMBP	TF-STAT3
miR-124-3p	G-DNMBP	TF-SP1
miR-124-3p	G-DNMBP	TF-EGR1
miR-26b-5p	G-DNMBP	TF-BATF
miR-26b-5p	G-DNMBP	TF-JUN
miR-26b-5p	G-DNMBP	TF-FOXM1
miR-26b-5p	G-DNMBP	TF-SRF
miR-26b-5p	G-DNMBP	TF-MXI1
miR-26b-5p	G-DNMBP	TF-TCF12
miR-26b-5p	G-DNMBP	TF-RCOR1
miR-335-5p	G-DNMBP	TF-MAFB
miR-335-5p	G-DNMBP	TF-JUND
miR-335-5p	G-DNMBP	TF-FOXA2
miR-335-5p	G-DNMBP	TF-MXI1
miR-335-5p	G-DNMBP	TF-FOS
miR-335-5p	G-DNMBP	TF-BHLHE40
miR-335-5p	G-DNMBP	TF-CDX2
miR-335-5p	G-DNMBP	TF-ETV1
miR-335-5p	G-DNMBP	TF-KDM5B
miR-335-5p	G-DNMBP	TF-SP1
miR-335-5p	G-DNMBP	TF-MYC
miR-1-3p	G-DMTN	TF-UBTF
miR-124-3p	G-DDIAS	TF-CAMTA1
miR-124-3p	G-DDIAS	TF-CEBPA
miR-124-3p	G-DDIAS	TF-GATA6
miR-124-3p	G-DDIAS	TF-EGR2
miR-124-3p	G-DDIAS	TF-STAT5A
miR-124-3p	G-DDIAS	TF-KLF4
miR-124-3p	G-DDIAS	TF-RELA
miR-124-3p	G-DDIAS	TF-EGR1
miR-1-3p	G-CSNK2A2	TF-SRF
miR-10b-5p	G-CRLF3	TF-TP53
miR-375	G-CRLF3	TF-GATA6
miR-375	G-CRLF3	TF-MYC
miR-192-5p	G-CRLF3	TF-CTCF
miR-192-5p	G-CRLF3	TF-EGR1
miR-145-5p	G-COL5A1	TF-SMAD2
miR-145-5p	G-COL5A1	TF-ESR1
G-COL5A1	miR-143-3p	TF-HNF4A
miR-29b-3p	G-COL5A1	TF-SP1
miR-26b-5p	G-COL5A1	TF-SRF
miR-26b-5p	G-COL5A1	TF-SP4
miR-155-5p	G-COL4A2	TF-SPI1
miR-335-5p	G-COL3A1	TF-CDX2
miR-218-5p	G-CLEC16A	TF-PPARG
miR-218-5p	G-CLEC16A	TF-KLF9
miR-335-5p	G-ASGR1	TF-FOXA2
miR-335-5p	G-ASGR1	TF-MXI1
miR-335-5p	G-ASGR1	TF-SPDEF
miR-1-3p	G-CHMP2A	TF-SRF
let-7b-5p	G-CHMP2A	TF-NCOR1
let-7b-5p	G-CHMP2A	TF-MYC
miR-335-5p	G-CFP	TF-JUND
miR-335-5p	G-CFP	TF-FOXA2
miR-335-5p	G-CFP	TF-FOS
miR-335-5p	G-CFP	TF-ATF2
miR-335-5p	G-CFP	TF-KDM5B
miR-335-5p	G-CFP	TF-SPDEF
miR-25-3p	G-CEP85	TF-MYC
miR-92a-3p	G-CEP85	TF-MYC
miR-26b-5p	G-CEP85	TF-GLI2
miR-26b-5p	G-CEP85	TF-SRF
miR-26b-5p	G-CEP85	TF-SP4
miR-26b-5p	G-CEP85	TF-FOXD2
miR-193b-3p	G-CDT1	TF-E2F6
miR-193b-3p	G-CDT1	TF-E2F1
miR-34a-5p	G-CDKN2C	TF-SMAD4
miR-34a-5p	G-CDKN2C	TF-CEBPB
miR-34a-5p	G-CDKN2C	TF-E2F1
miR-34a-5p	G-CDKN2C	TF-TP53
miR-34a-5p	G-CDKN2C	TF-YY1
miR-34a-5p	G-CDKN2C	TF-MYC
miR-92a-3p	G-CDK9	TF-SOX4
miR-92a-3p	G-CDK9	TF-GABPA
miR-92a-3p	G-CDK9	TF-MYC
miR-1-3p	G-CDK9	TF-GLI2
miR-1-3p	G-CDK9	TF-SRF
miR-1-3p	G-CDK9	TF-UBTF
miR-16-5p	G-CDK9	TF-JUN
miR-16-5p	G-CDK9	TF-E2F7
miR-16-5p	G-CDK9	TF-BHLHE40
miR-16-5p	G-CDK9	TF-ELK4
miR-16-5p	G-CDK9	TF-SP1
miR-16-5p	G-CDK9	TF-TP53
miR-16-5p	G-CDK9	TF-MYC
miR-27b-3p	G-CDH11	TF-E2F7
miR-124-3p	G-CDH11	TF-MBD3
miR-124-3p	G-CDH11	TF-CEBPA
miR-124-3p	G-CDH11	TF-GATA6
miR-124-3p	G-CDH11	TF-EGR1
miR-335-5p	G-CDH11	TF-EHF
miR-335-5p	G-CDH11	TF-CDX2
miR-335-5p	G-CDH11	TF-MYC
let-7b-5p	G-CDCA8	TF-ELK4
let-7b-5p	G-CDCA8	TF-SP1
miR-16-5p	G-CDCA8	TF-MYB
miR-16-5p	G-CDCA8	TF-ELK4
miR-16-5p	G-CDCA8	TF-NFIC
miR-16-5p	G-CDCA8	TF-SP1
miR-16-5p	G-CDCA8	TF-TP53
miR-124-3p	G-CD86	TF-BCL6
miR-124-3p	G-CD86	TF-NFIC
miR-32-5p	G-CD69	TF-NR3C1
miR-32-5p	G-CD69	TF-GATA6
miR-92b-3p	G-CD69	TF-MYC
miR-92a-3p	G-CD69	TF-GATA6
miR-92a-3p	G-CD69	TF-GABPA
miR-92a-3p	G-CD69	TF-MYC
miR-335-5p	G-CD69	TF-REST
miR-335-5p	G-CD69	TF-BCL6
miR-335-5p	G-CD69	TF-KDM5B
miR-335-5p	G-CD69	TF-MYC
miR-335-5p	G-CD38	TF-EBF1
miR-335-5p	G-CD38	TF-BCL6
miR-335-5p	G-CD38	TF-ZEB1
miR-335-5p	G-CD38	TF-ATF2
miR-335-5p	G-CD38	TF-SPDEF
miR-335-5p	G-CD38	TF-MYC
miR-335-5p	G-CD177	TF-CDX2
miR-335-5p	G-CD177	TF-SPDEF
miR-1-3p	G-CCDC134	TF-UBTF
let-7b-5p	G-CCDC134	TF-GATA6
let-7b-5p	G-CCDC134	TF-ELK4
let-7b-5p	G-CCDC134	TF-E2F6
let-7b-5p	G-CCDC134	TF-SP1
let-7b-5p	G-CCDC134	TF-MYC
miR-26b-5p	G-CASP4	TF-RCOR1
miR-26b-5p	G-CA1	TF-GATA2
miR-26b-5p	G-CA1	TF-SRF
miR-26b-5p	G-CA1	TF-MXI1
miR-26b-5p	G-CA1	TF-RCOR1
miR-124-3p	G-CAMP	TF-CEBPA
miR-124-3p	G-CAMP	TF-TP63
miR-124-3p	G-CAMP	TF-EGR2
miR-124-3p	G-CAMP	TF-BCL6
miR-124-3p	G-CAMP	TF-SNAI2
miR-124-3p	G-CAMP	TF-NFIC
miR-16-5p	G-BYSL	TF-BHLHE40
miR-16-5p	G-BYSL	TF-TP53
miR-16-5p	G-BYSL	TF-MYC
miR-335-5p	G-BSN	TF-EHF
miR-335-5p	G-BSN	TF-NANOG
miR-335-5p	G-BSN	TF-KLF9
miR-335-5p	G-BSN	TF-KDM5A
miR-26b-5p	G-C17orf53	TF-ETV4
miR-26b-5p	G-C17orf53	TF-ID1
miR-26b-5p	G-C17orf53	TF-FOXM1
miR-26b-5p	G-C17orf53	TF-SRF
miR-26b-5p	G-C17orf53	TF-MXI1
miR-26b-5p	G-C17orf53	TF-FOXD2
miR-26b-5p	G-C17orf53	TF-RCOR1
G-AXIN1	miR-92a-3p	TF-KLF4
G-AXIN1	miR-92a-3p	TF-GABPA
G-AXIN1	miR-92a-3p	TF-MYC
miR-218-5p	G-AXIN1	TF-SNAI2
miR-218-5p	G-AXIN1	TF-KLF9
miR-218-5p	G-AXIN1	TF-ARNT
miR-335-5p	G-AXIN1	TF-SP4
miR-335-5p	G-AXIN1	TF-ZEB1
miR-335-5p	G-AXIN1	TF-KLF9
miR-335-5p	G-AXIN1	TF-ETV1
miR-335-5p	G-AXIN1	TF-KLF4
miR-335-5p	G-AXIN1	TF-KDM5B
miR-335-5p	G-AXIN1	TF-SP1
miR-335-5p	G-AXIN1	TF-MYC
miR-124-3p	G-ATP8B2	TF-KLF9
miR-124-3p	G-ATP8B2	TF-STAT5A
miR-124-3p	G-ATP8B2	TF-KLF4
miR-124-3p	G-ATP8B2	TF-SP1
miR-124-3p	G-ATP8B2	TF-EGR1
miR-335-5p	G-ATP8B2	TF-MEF2A
miR-335-5p	G-ATP8B2	TF-ZEB1
miR-335-5p	G-ATP8B2	TF-KLF9
miR-335-5p	G-ATP8B2	TF-KLF4
miR-335-5p	G-ATP8B2	TF-KDM5B
miR-335-5p	G-ATP8B2	TF-SP1
miR-335-5p	G-ATP8B2	TF-SPDEF
miR-335-5p	G-ATP8B2	TF-MYC
miR-335-5p	G-ATP1B2	TF-SPDEF
miR-218-5p	G-ASAP2	TF-KLF9
miR-218-5p	G-ASAP2	TF-ARNT
G-ARID3B	let-7c-5p	TF-PBX3
G-ARID3B	let-7c-5p	TF-SPDEF
G-ARID3B	let-7c-5p	TF-MYC
G-ARID3B	let-7f-5p	TF-SP1
G-ARID3B	let-7f-5p	TF-MYC
G-ARID3B	let-7g-5p	TF-MYC
G-ARID3B	let-7d-5p	TF-MYC
G-ARID3B	let-7i-5p	TF-MYC
G-ARID3B	let-7a-5p	TF-STAT3
G-ARID3B	let-7a-5p	TF-SP1
G-ARID3B	let-7a-5p	TF-MYC
let-7e-5p	G-ARID3B	TF-MYC
miR-98-5p	G-ARID3B	TF-PBX3
miR-98-5p	G-ARID3B	TF-E2F4
miR-98-5p	G-ARID3B	TF-MYC
let-7b-5p	G-ARID3B	TF-ELK4
let-7b-5p	G-ARID3B	TF-SP1
let-7b-5p	G-ARID3B	TF-MYC
miR-26b-5p	G-ARID3B	TF-BATF
miR-26b-5p	G-ARID3B	TF-JUN
miR-26b-5p	G-ARID3B	TF-ATF3
miR-26b-5p	G-ARID3B	TF-PBX3
miR-26b-5p	G-ARID3B	TF-FOXM1
miR-26b-5p	G-ARID3B	TF-GLI2
miR-26b-5p	G-ARID3B	TF-E2F7
miR-26b-5p	G-ARID3B	TF-GATA2
miR-26b-5p	G-ARID3B	TF-TCF12
miR-26b-5p	G-ARID3B	TF-RCOR1
G-ARID3B	miR-335-5p	TF-MEF2A
G-ARID3B	miR-335-5p	TF-JUND
G-ARID3B	miR-335-5p	TF-EHF
G-ARID3B	miR-335-5p	TF-FOS
G-ARID3B	miR-335-5p	TF-NANOG
G-ARID3B	miR-335-5p	TF-BCL6
G-ARID3B	miR-335-5p	TF-MYOD1
G-ARID3B	miR-335-5p	TF-HOXC6
G-ARID3B	miR-335-5p	TF-RARG
G-ARID3B	miR-335-5p	TF-ZEB1
G-ARID3B	miR-335-5p	TF-KLF9
G-ARID3B	miR-335-5p	TF-ATF2
G-ARID3B	miR-335-5p	TF-ETV1
G-ARID3B	miR-335-5p	TF-KLF4
G-ARID3B	miR-335-5p	TF-SP1
G-ARID3B	miR-335-5p	TF-SPDEF
G-ARID3B	miR-335-5p	TF-MYC
G-ARGLU1	miR-107	TF-ELK4
G-ARGLU1	miR-107	TF-KLF4
miR-103a-3p	G-ARGLU1	TF-ELK4
miR-103a-3p	G-ARGLU1	TF-KLF4
miR-155-5p	G-ARGLU1	TF-ZNF384
miR-155-5p	G-ARGLU1	TF-TCF12
miR-155-5p	G-ARGLU1	TF-CEBPB
miR-155-5p	G-ARGLU1	TF-RCOR1
miR-155-5p	G-ARGLU1	TF-ETS1
miR-155-5p	G-ARGLU1	TF-SP1
miR-98-5p	G-ALKBH1	TF-MYC
G-ALG8	miR-98-5p	TF-GATA6
G-ALG8	miR-98-5p	TF-TEAD4
G-ALG8	miR-98-5p	TF-E2F4
G-ALG8	miR-98-5p	TF-E2F6
G-ALG8	miR-98-5p	TF-MYC
G-ALCAM	miR-148a-3p	TF-MYC
G-ALCAM	miR-148b-3p	TF-SNAI2
G-ALCAM	miR-192-5p	TF-NFYA
G-ALCAM	miR-192-5p	TF-SP4
G-ALCAM	miR-192-5p	TF-FOS
G-ALCAM	miR-192-5p	TF-FOXA1
G-AGTR1	miR-155-5p	TF-SMAD2
miR-124-3p	G-AGTR1	TF-E2F6
G-AGFG1	miR-103a-3p	TF-KLF4
G-ADCY3	miR-124-3p	TF-ID1
G-ADCY3	miR-124-3p	TF-SNAI2
G-ADCY3	miR-124-3p	TF-E2F6
G-ADCY3	miR-124-3p	TF-STAT5A
G-ADCY3	miR-124-3p	TF-KLF4
G-ADCY3	miR-124-3p	TF-RELA
G-ADCY3	miR-124-3p	TF-EGR1
miR-26b-5p	G-ABCG4	TF-ID1
G-CTSV	miR-26b-5p	TF-MXI1
G-CTSV	miR-26b-5p	TF-TCF12
G-C1orf52	miR-148a-5p	TF-MYC
miR-30a-5p	G-SON	TF-MYBL2
miR-30a-5p	G-SON	TF-TP53
G-SON	miR-361-5p	TF-AR
G-SON	miR-374b-5p	TF-SP1
miR-186-5p	G-SON	TF-SP1
miR-186-5p	G-SON	TF-YY1
miR-130b-3p	G-SON	TF-ZBTB7A
miR-130b-3p	G-SON	TF-E2F1
miR-340-5p	G-SON	TF-YY1
miR-103a-3p	G-SON	TF-ELK4
miR-103a-3p	G-SON	TF-KLF4
miR-34a-5p	G-SON	TF-CEBPB
miR-34a-5p	G-SON	TF-KLF4
miR-34a-5p	G-SON	TF-E2F1
miR-34a-5p	G-SON	TF-TP53
miR-34a-5p	G-SON	TF-YY1
miR-34a-5p	G-SON	TF-MYC
let-7b-5p	G-SON	TF-ELK4
let-7b-5p	G-SON	TF-E2F6
let-7b-5p	G-SON	TF-SP1
let-7b-5p	G-SON	TF-MYC
miR-16-5p	G-SON	TF-MAFK
miR-16-5p	G-SON	TF-ELK4
miR-16-5p	G-SON	TF-TBP
miR-16-5p	G-SON	TF-SP1
miR-16-5p	G-SON	TF-TP53
miR-16-5p	G-SON	TF-MYC
miR-30a-5p	G-KIF11	TF-MYBL2
miR-30a-5p	G-KIF11	TF-KLF9
miR-30a-5p	G-KIF11	TF-FOXA1
miR-30a-5p	G-KIF11	TF-TP53
miR-34a-5p	G-KIF11	TF-FOXP1
miR-34a-5p	G-KIF11	TF-BCLAF1
miR-34a-5p	G-KIF11	TF-KLF4
miR-34a-5p	G-KIF11	TF-E2F1
miR-34a-5p	G-KIF11	TF-TP53
miR-34a-5p	G-KIF11	TF-YY1
miR-193b-3p	G-KIF11	TF-NFKB2
miR-193b-3p	G-KIF11	TF-E2F1
G-BTG2	miR-34b-5p	TF-MYC
G-BTG2	miR-449c-5p	TF-MYC
G-BTG2	miR-3179	TF-UBTF
G-BTG2	miR-3179	TF-NFIC
miR-21-5p	G-BTG2	TF-REST
miR-21-5p	G-BTG2	TF-BCL6
miR-21-5p	G-BTG2	TF-ATF2
miR-21-5p	G-BTG2	TF-KLF5
miR-21-5p	G-BTG2	TF-SP1
miR-21-5p	G-BTG2	TF-MYC
G-BTG2	miR-125a-5p	TF-REST
G-BTG2	miR-125a-5p	TF-ZBTB7A
G-BTG2	miR-125a-5p	TF-SP1
G-BTG2	miR-125a-5p	TF-TP53
G-BTG2	miR-125a-5p	TF-MYC
G-BTG2	miR-186-5p	TF-SP1
G-BTG2	miR-25-3p	TF-GATA6
G-BTG2	miR-25-3p	TF-MYC
G-BTG2	miR-32-5p	TF-GATA6
G-BTG2	miR-92b-3p	TF-MYC
miR-27a-3p	G-BTG2	TF-GATA3
miR-27a-3p	G-BTG2	TF-GATA2
miR-27a-3p	G-BTG2	TF-SP1
miR-27a-3p	G-BTG2	TF-TP53
miR-125b-5p	G-BTG2	TF-REST
G-BTG2	miR-101-3p	TF-ZBTB7A
G-BTG2	miR-29b-3p	TF-REST
G-BTG2	miR-29b-3p	TF-MAZ
G-BTG2	miR-29b-3p	TF-SP1
G-BTG2	miR-29b-3p	TF-MYC
miR-27b-3p	G-BTG2	TF-CREB1
miR-27b-3p	G-BTG2	TF-SP1
miR-195-5p	G-BTG2	TF-RCOR1
G-BTG2	miR-15b-5p	TF-RCOR1
G-BTG2	miR-29c-3p	TF-REST
G-BTG2	miR-29c-3p	TF-MAZ
G-BTG2	miR-29c-3p	TF-SP1
G-BTG2	miR-7-5p	TF-MAZ
G-BTG2	miR-7-5p	TF-GATA6
G-BTG2	miR-7-5p	TF-RELA
G-BTG2	miR-29a-3p	TF-REST
G-BTG2	miR-29a-3p	TF-MAZ
G-BTG2	miR-15a-5p	TF-ATF2
G-BTG2	miR-15a-5p	TF-RCOR1
G-BTG2	miR-15a-5p	TF-TP53
miR-92a-3p	G-BTG2	TF-GATA6
miR-92a-3p	G-BTG2	TF-MYC
miR-218-5p	G-BTG2	TF-LEF1
miR-218-5p	G-BTG2	TF-RUNX3
miR-16-5p	G-BTG2	TF-NFIC
miR-16-5p	G-BTG2	TF-SP1
miR-16-5p	G-BTG2	TF-TP53
miR-16-5p	G-BTG2	TF-MYC
miR-26b-5p	G-BTG2	TF-GLI2
miR-26b-5p	G-BTG2	TF-GATA2
miR-26b-5p	G-BTG2	TF-SRF
miR-26b-5p	G-BTG2	TF-MXI1
miR-26b-5p	G-BTG2	TF-RCOR1
miR-122-5p	G-KATNAL1	TF-SOX2
miR-19a-3p	G-FAM46C	TF-ESR1
miR-19a-3p	G-FAM46C	TF-TP53
miR-19a-3p	G-GIGYF1	TF-TP53
miR-181a-5p	G-FOS	TF-ZNF12
miR-181a-5p	G-FOS	TF-SNAI2
miR-181a-5p	G-FOS	TF-TEAD4
miR-181a-5p	G-FOS	TF-STAT3
miR-181a-5p	G-FOS	TF-KDM5A
miR-181a-5p	G-HSPA1B	TF-PGR
miR-181a-5p	G-HSPA1B	TF-CEBPA
miR-181a-5p	G-HSPA1B	TF-FOS
miR-181a-5p	G-HSPA1B	TF-STAT3
miR-181a-5p	G-HSPA1B	TF-RCOR1
miR-181a-5p	G-HSPA1B	TF-ETS1
miR-24-3p	G-UBE2C	TF-MXI1
miR-24-3p	G-UBE2C	TF-E2F1
miR-24-3p	G-UBE2C	TF-CTCF
miR-24-3p	G-UBE2C	TF-MYC
miR-140-3p	G-UBE2C	TF-NFYA
miR-193b-3p	G-UBE2C	TF-ELK3
miR-193b-3p	G-UBE2C	TF-MAX
miR-193b-3p	G-UBE2C	TF-E2F1
miR-16-5p	G-UBE2C	TF-ZFHX3
miR-16-5p	G-UBE2C	TF-TBP
miR-16-5p	G-UBE2C	TF-SP1
miR-16-5p	G-UBE2C	TF-MYC
miR-30a-5p	G-JUN	TF-JUN
miR-30a-5p	G-JUN	TF-FOXA1
miR-30a-5p	G-JUN	TF-TP53
G-JUN	miR-200b-3p	TF-JUN
G-JUN	miR-200b-3p	TF-ZEB1
G-JUN	miR-200b-3p	TF-SP1
G-JUN	miR-342-3p	TF-JUN
G-JUN	miR-429	TF-JUN
G-JUN	miR-429	TF-ZEB1
G-JUN	miR-429	TF-SP1
miR-139-5p	G-JUN	TF-JUN
miR-200c-3p	G-JUN	TF-JUN
miR-200c-3p	G-JUN	TF-ZEB1
miR-101-3p	G-JUN	TF-JUN
miR-101-3p	G-JUN	TF-RUNX1
miR-101-3p	G-JUN	TF-FOS
miR-101-3p	G-JUN	TF-ZBTB7A
miR-29c-3p	G-JUN	TF-JUN
miR-29c-3p	G-JUN	TF-SP1
miR-16-5p	G-JUN	TF-JUN
miR-16-5p	G-JUN	TF-ELK4
miR-16-5p	G-JUN	TF-NFIC
miR-16-5p	G-JUN	TF-TBP
miR-16-5p	G-JUN	TF-SP1
miR-16-5p	G-JUN	TF-TP53
miR-16-5p	G-JUN	TF-MYC
miR-26b-5p	G-JUN	TF-HSF1
miR-26b-5p	G-JUN	TF-MEF2C
miR-26b-5p	G-JUN	TF-ID1
miR-26b-5p	G-JUN	TF-ZNF84
miR-26b-5p	G-JUN	TF-JUN
miR-26b-5p	G-JUN	TF-GATA2
miR-26b-5p	G-JUN	TF-FOXD2
miR-26b-5p	G-JUN	TF-RCOR1
miR-30a-5p	G-ITGA2	TF-TP53
miR-107	G-ITGA2	TF-MYB
miR-15a-5p	G-ITGA2	TF-MYB
miR-15a-5p	G-ITGA2	TF-TP53
miR-103a-3p	G-ITGA2	TF-MYB
miR-335-5p	G-ITGA2	TF-EHF
miR-335-5p	G-ITGA2	TF-CDX2
miR-335-5p	G-ITGA2	TF-ETV1
miR-335-5p	G-ITGA2	TF-KDM5A
miR-335-5p	G-ITGA2	TF-KDM5B
miR-335-5p	G-ITGA2	TF-SPDEF
miR-335-5p	G-ITGA2	TF-MYC
miR-21-5p	G-GAPVD1	TF-SOX2
miR-21-5p	G-GAPVD1	TF-BCL6
miR-21-5p	G-GAPVD1	TF-STAT3
miR-21-5p	G-GAPVD1	TF-ATF2
miR-21-5p	G-GAPVD1	TF-MYC
miR-34a-5p	G-GAPVD1	TF-MYB
miR-34a-5p	G-GAPVD1	TF-HNF4A
miR-34a-5p	G-GAPVD1	TF-BCLAF1
miR-34a-5p	G-GAPVD1	TF-E2F1
miR-34a-5p	G-GAPVD1	TF-TP53
miR-34a-5p	G-GAPVD1	TF-YY1
miR-34a-5p	G-GAPVD1	TF-MYC
miR-98-5p	G-GAPVD1	TF-TFAP2A
miR-98-5p	G-GAPVD1	TF-TEAD4
miR-98-5p	G-GAPVD1	TF-MYC
miR-155-5p	G-GAPVD1	TF-MYB
miR-155-5p	G-GAPVD1	TF-NR3C1
miR-155-5p	G-GAPVD1	TF-STAT3
miR-155-5p	G-GAPVD1	TF-SPI1
miR-155-5p	G-GAPVD1	TF-RCOR1
miR-155-5p	G-GAPVD1	TF-ETS1
let-7b-5p	G-GAPVD1	TF-NCOR1
let-7b-5p	G-GAPVD1	TF-ELK4
let-7b-5p	G-GAPVD1	TF-MYC
miR-20b-5p	G-POLQ	TF-RUNX3
miR-20b-5p	G-POLQ	TF-ELK4
miR-20b-5p	G-POLQ	TF-STAT3
miR-20b-5p	G-MTF1	TF-RUNX3
miR-20b-5p	G-MTF1	TF-ELK4
miR-20b-5p	G-MTF1	TF-ZBTB7A
miR-20b-5p	G-MTF1	TF-E2F1
miR-20b-5p	G-FAM46C	TF-STAT3
miR-20b-5p	G-FAM46C	TF-ZBTB7A
miR-20b-5p	G-FAM46C	TF-E2F1
miR-20b-5p	G-ZFYVE26	TF-STAT3
miR-20b-5p	G-ZFYVE26	TF-ZBTB7A
miR-20b-5p	G-RAB22A	TF-ELK4
miR-20b-5p	G-RAB22A	TF-STAT3
miR-20b-5p	G-RAB22A	TF-ZBTB7A
miR-24-3p	G-ZNF317	TF-E2F1
miR-24-3p	G-ZNF317	TF-CTCF
miR-24-3p	G-ZNF317	TF-TP53
miR-24-3p	G-ZNF317	TF-MYC
G-ZNF317	miR-301a-3p	TF-RUNX3
miR-218-5p	G-ZNF317	TF-SP3
miR-218-5p	G-ZNF317	TF-RFX5
miR-218-5p	G-ZNF317	TF-RUNX3
let-7b-5p	G-ZNF317	TF-GATA6
let-7b-5p	G-ZNF317	TF-ELK4
let-7b-5p	G-ZNF317	TF-E2F6
let-7b-5p	G-ZNF317	TF-MYC
miR-92a-3p	G-XYLT2	TF-KLF4
miR-92a-3p	G-XYLT2	TF-MYC
let-7b-5p	G-XYLT2	TF-E2F6
let-7b-5p	G-XYLT2	TF-SP1
let-7b-5p	G-XYLT2	TF-MYC
miR-24-3p	G-UCK2	TF-E2F1
miR-24-3p	G-UCK2	TF-CTCF
miR-24-3p	G-UCK2	TF-TP53
miR-24-3p	G-UCK2	TF-MYC
miR-34a-5p	G-UCK2	TF-SMAD4
miR-34a-5p	G-UCK2	TF-CEBPB
miR-34a-5p	G-UCK2	TF-E2F1
miR-34a-5p	G-UCK2	TF-TP53
miR-34a-5p	G-UCK2	TF-MYC
miR-218-5p	G-UCK2	TF-ARNT
let-7b-5p	G-UCK2	TF-E2F6
let-7b-5p	G-UCK2	TF-MYC
miR-128-3p	G-TM4SF1	TF-GATA6
miR-128-3p	G-TM4SF1	TF-SP1
miR-206	G-TM4SF1	TF-ESR1
miR-15a-5p	G-TM4SF1	TF-TP53
miR-218-5p	G-TM4SF1	TF-SP3
miR-1-3p	G-TM4SF1	TF-GATA3
miR-16-5p	G-TM4SF1	TF-SP1
miR-16-5p	G-TM4SF1	TF-TP53
miR-30a-5p	G-SLC38A5	TF-TP53
miR-155-5p	G-SLC38A5	TF-ZNF384
let-7b-5p	G-SLC38A5	TF-E2F6
let-7b-5p	G-SLC38A5	TF-MYC
miR-124-3p	G-SLC38A5	TF-MAZ
miR-124-3p	G-SLC38A5	TF-E2F6
miR-124-3p	G-SLC38A5	TF-EGR1
miR-16-5p	G-SLC38A5	TF-BHLHE40
miR-16-5p	G-SLC38A5	TF-TP53
miR-16-5p	G-SLC38A5	TF-MYC
miR-21-5p	G-SCRN1	TF-REST
miR-21-5p	G-RASEF	TF-STAT3
miR-21-5p	G-RASEF	TF-MYC
miR-424-5p	G-RASEF	TF-HIF1A
miR-218-5p	G-RASEF	TF-SNAI2
G-RAB22A	miR-372-3p	TF-ELK4
G-RAB22A	miR-302d-3p	TF-ELK4
G-RAB22A	miR-302b-3p	TF-ELK4
G-RAB22A	miR-302a-3p	TF-ELK4
miR-484	G-NLE1	TF-RFX5
miR-375	G-NLE1	TF-MYC
miR-98-5p	G-NLE1	TF-E2F6
miR-98-5p	G-NLE1	TF-MYC
let-7b-5p	G-NLE1	TF-E2F6
let-7b-5p	G-NLE1	TF-MYC
miR-16-5p	G-NLE1	TF-E2F7
miR-16-5p	G-NLE1	TF-MYC
miR-24-3p	G-MMS19	TF-E2F1
miR-24-3p	G-MMS19	TF-CTCF
miR-24-3p	G-MMS19	TF-TP53
miR-24-3p	G-MMS19	TF-MYC
miR-34a-5p	G-MMS19	TF-KLF4
miR-34a-5p	G-MMS19	TF-E2F1
miR-34a-5p	G-MMS19	TF-TP53
miR-34a-5p	G-MMS19	TF-YY1
miR-34a-5p	G-MMS19	TF-MYC
miR-16-5p	G-MMS19	TF-BHLHE40
miR-16-5p	G-MMS19	TF-SP1
miR-16-5p	G-MMS19	TF-TP53
miR-16-5p	G-MMS19	TF-MYC
miR-21-5p	G-MMP9	TF-ATF2
miR-128-3p	G-MARCKSL1	TF-ZNF552
miR-128-3p	G-MARCKSL1	TF-KLF4
miR-128-3p	G-MARCKSL1	TF-SP1
miR-24-3p	G-MARCKSL1	TF-E2F1
miR-24-3p	G-MARCKSL1	TF-CTCF
miR-24-3p	G-MARCKSL1	TF-TP53
miR-24-3p	G-MARCKSL1	TF-MYC
let-7c-5p	G-MARCKSL1	TF-SPDEF
let-7c-5p	G-MARCKSL1	TF-MYC
let-7f-5p	G-MARCKSL1	TF-SP1
let-7f-5p	G-MARCKSL1	TF-MYC
let-7g-5p	G-MARCKSL1	TF-MYC
let-7d-5p	G-MARCKSL1	TF-MYC
let-7i-5p	G-MARCKSL1	TF-MYC
let-7a-5p	G-MARCKSL1	TF-SP1
let-7a-5p	G-MARCKSL1	TF-MYC
let-7e-5p	G-MARCKSL1	TF-MYC
miR-98-5p	G-MARCKSL1	TF-E2F4
miR-98-5p	G-MARCKSL1	TF-MYC
let-7b-5p	G-MARCKSL1	TF-SP1
let-7b-5p	G-MARCKSL1	TF-MYC
miR-335-5p	G-MARCKSL1	TF-ESR2
miR-335-5p	G-MARCKSL1	TF-SP4
miR-335-5p	G-MARCKSL1	TF-NANOG
miR-335-5p	G-MARCKSL1	TF-ZEB1
miR-335-5p	G-MARCKSL1	TF-KLF9
miR-335-5p	G-MARCKSL1	TF-KLF4
miR-335-5p	G-MARCKSL1	TF-SP1
miR-335-5p	G-MARCKSL1	TF-SPDEF
miR-335-5p	G-MARCKSL1	TF-MYC
miR-22-3p	G-LGALS1	TF-ESR1
miR-22-3p	G-LGALS1	TF-SP1
miR-30a-5p	G-INTS6	TF-FOXA1
miR-1-3p	G-INTS6	TF-GATA3
miR-1-3p	G-INTS6	TF-SRF
miR-155-5p	G-INTS6	TF-NR3C1
miR-155-5p	G-INTS6	TF-TCF12
miR-155-5p	G-INTS6	TF-STAT3
miR-155-5p	G-INTS6	TF-CEBPB
miR-155-5p	G-INTS6	TF-SPI1
miR-155-5p	G-INTS6	TF-SP1
miR-181d-5p	G-HSPA1B	TF-ETS1
miR-181c-5p	G-HSPA1B	TF-ETS1
miR-106a-5p	G-KATNAL1	TF-KLF3
miR-106a-5p	G-KATNAL1	TF-ZBTB7A
miR-106a-5p	G-KATNAL1	TF-E2F1
miR-106a-5p	G-MTF1	TF-RUNX3
miR-106a-5p	G-MTF1	TF-ELK4
miR-106a-5p	G-MTF1	TF-ZBTB7A
miR-106a-5p	G-MTF1	TF-E2F1
miR-106a-5p	G-ZFYVE26	TF-NFAT5
miR-106a-5p	G-ZFYVE26	TF-STAT3
miR-106a-5p	G-ZFYVE26	TF-ZBTB7A
miR-106a-5p	G-RAB22A	TF-ELK4
miR-106a-5p	G-RAB22A	TF-SMAD4
miR-106a-5p	G-RAB22A	TF-STAT3
miR-106a-5p	G-RAB22A	TF-ZBTB7A
G-FRAT2	miR-22-3p	TF-MAX
G-FRAT2	miR-22-3p	TF-RCOR1
G-FRAT2	miR-22-3p	TF-SP1
miR-26a-5p	G-FRAT2	TF-RCOR1
miR-26a-5p	G-FRAT2	TF-MYC
miR-29c-3p	G-FRAT2	TF-TFAP2C
miR-29c-3p	G-FRAT2	TF-KLF4
miR-29c-3p	G-FRAT2	TF-KDM5B
miR-29c-3p	G-FRAT2	TF-SP1
miR-26b-5p	G-FRAT2	TF-MXI1
miR-26b-5p	G-FRAT2	TF-RCOR1
G-FOS	miR-181b-5p	TF-CREB1
miR-181b-5p	G-HSPA1B	TF-FOS
miR-181b-5p	G-HSPA1B	TF-ETS1
G-FAM46C	miR-33a-5p	TF-SP1
G-FAM46C	miR-33a-5p	TF-MYC
miR-30a-5p	G-DSG2	TF-TP53
miR-1-3p	G-DSG2	TF-SRF
miR-155-5p	G-DSG2	TF-TCF12
miR-155-5p	G-DSG2	TF-CEBPB
miR-155-5p	G-DSG2	TF-RCOR1
miR-155-5p	G-DSG2	TF-SP1
let-7b-5p	G-DSG2	TF-GATA6
let-7b-5p	G-DSG2	TF-SP1
let-7b-5p	G-DSG2	TF-MYC
miR-124-3p	G-DSG2	TF-GATA6
miR-124-3p	G-DSG2	TF-TP63
miR-124-3p	G-DSG2	TF-SNAI2
miR-124-3p	G-DSG2	TF-NFIC
miR-124-3p	G-DSG2	TF-SP1
miR-124-3p	G-DSG2	TF-EGR1
miR-331-3p	G-COTL1	TF-ATF3
miR-320a	G-COTL1	TF-PBX3
miR-320a	G-COTL1	TF-USF2
miR-320a	G-COTL1	TF-MAX
miR-320a	G-COTL1	TF-MYC
miR-193b-3p	G-COTL1	TF-SMAD3
miR-193b-3p	G-COTL1	TF-E2F2
miR-193b-3p	G-COTL1	TF-ESR1
miR-193b-3p	G-COTL1	TF-E2F6
miR-193b-3p	G-COTL1	TF-MAX
miR-193b-3p	G-COTL1	TF-E2F1
miR-24-3p	G-CHD8	TF-MXI1
miR-24-3p	G-CHD8	TF-E2F1
miR-24-3p	G-CHD8	TF-TP53
miR-24-3p	G-CHD8	TF-MYC
miR-218-5p	G-CHD8	TF-RUNX3
miR-155-5p	G-CHD8	TF-STAT3
miR-155-5p	G-CHD8	TF-SPI1
miR-155-5p	G-CHD8	TF-RCOR1
miR-155-5p	G-CHD8	TF-ETS1
miR-155-5p	G-CHD8	TF-SP1
miR-3179	G-CDCA3	TF-UBTF
miR-3179	G-CDCA3	TF-NFIC
G-CDCA3	miR-320a	TF-MAX
G-CDCA3	miR-320a	TF-MYC
let-7e-5p	G-CDCA3	TF-E2F6
let-7e-5p	G-CDCA3	TF-MYC
miR-26b-5p	G-CDCA3	TF-SIX5
miR-26b-5p	G-CDCA3	TF-GLI2
miR-26b-5p	G-CDCA3	TF-MXI1
miR-26b-5p	G-CDCA3	TF-SP4
miR-26b-5p	G-CDCA3	TF-TCF12
G-CDC25A	miR-449a	TF-HNF4A
G-CDC25A	miR-449a	TF-MYC
miR-21-5p	G-CDC25A	TF-KLF9
miR-21-5p	G-CDC25A	TF-KLF5
miR-21-5p	G-CDC25A	TF-SP1
miR-21-5p	G-CDC25A	TF-MYC
G-CDC25A	miR-141-3p	TF-KLF5
miR-140-3p	G-CDC25A	TF-NFYA
miR-15a-5p	G-CDC25A	TF-TP53
miR-103a-3p	G-CDC25A	TF-ZFHX3
miR-34a-5p	G-CDC25A	TF-HNF4A
miR-34a-5p	G-CDC25A	TF-E2F1
miR-34a-5p	G-CDC25A	TF-TP53
miR-34a-5p	G-CDC25A	TF-YY1
miR-34a-5p	G-CDC25A	TF-MYC
miR-193b-3p	G-CDC25A	TF-E2F6
miR-193b-3p	G-CDC25A	TF-MAX
miR-193b-3p	G-CDC25A	TF-E2F1
miR-98-5p	G-CDC25A	TF-ZFHX3
miR-98-5p	G-CDC25A	TF-E2F4
miR-98-5p	G-CDC25A	TF-E2F6
miR-98-5p	G-CDC25A	TF-MYC
miR-192-5p	G-CDC25A	TF-NFYA
miR-192-5p	G-CDC25A	TF-MXI1
miR-192-5p	G-CDC25A	TF-SP4
miR-192-5p	G-CDC25A	TF-FOS
miR-192-5p	G-CDC25A	TF-FOXA1
miR-192-5p	G-CDC25A	TF-CTCF
miR-192-5p	G-CDC25A	TF-EGR1
miR-16-5p	G-CDC25A	TF-TFAP4
miR-16-5p	G-CDC25A	TF-ZFHX3
miR-16-5p	G-CDC25A	TF-NFIC
miR-16-5p	G-CDC25A	TF-TBP
miR-16-5p	G-CDC25A	TF-SP1
miR-16-5p	G-CDC25A	TF-TP53
miR-16-5p	G-CDC25A	TF-MYC
G-CDC20	miR-30a-5p	TF-MYBL2
G-CDC20	miR-30a-5p	TF-TP53
miR-34a-5p	G-CDC20	TF-BCLAF1
miR-34a-5p	G-CDC20	TF-TP53
miR-34a-5p	G-CDC20	TF-MYC
miR-193b-3p	G-CDC20	TF-ELK3
miR-192-5p	G-CDC20	TF-NFYA
miR-192-5p	G-CDC20	TF-FOS
miR-192-5p	G-CDC20	TF-CTCF
miR-16-5p	G-CDC20	TF-SP1
miR-16-5p	G-CDC20	TF-TP53
miR-16-5p	G-CDC20	TF-MYC
miR-128-3p	G-CCNT1	TF-RUNX1
miR-128-3p	G-CCNT1	TF-GATA6
miR-128-3p	G-CCNT1	TF-KLF5
miR-128-3p	G-CCNT1	TF-KLF4
miR-107	G-CCNT1	TF-ELK4
miR-107	G-CCNT1	TF-KLF4
G-CCNT1	miR-424-5p	TF-TFAP2A
G-CCNT1	miR-424-5p	TF-ELK4
miR-27b-3p	G-CCNT1	TF-RUNX1
miR-27b-3p	G-CCNT1	TF-CREB1
miR-195-5p	G-CCNT1	TF-RCOR1
miR-15b-5p	G-CCNT1	TF-TFAP2A
miR-15b-5p	G-CCNT1	TF-ELK4
miR-15b-5p	G-CCNT1	TF-RCOR1
miR-15a-5p	G-CCNT1	TF-TFAP2A
miR-15a-5p	G-CCNT1	TF-BHLHE40
miR-15a-5p	G-CCNT1	TF-ELK4
miR-15a-5p	G-CCNT1	TF-ATF2
miR-15a-5p	G-CCNT1	TF-RCOR1
miR-15a-5p	G-CCNT1	TF-TP53
miR-103a-3p	G-CCNT1	TF-TFAP2A
miR-103a-3p	G-CCNT1	TF-ELK4
miR-103a-3p	G-CCNT1	TF-KLF4
miR-16-5p	G-CCNT1	TF-TFAP2A
miR-16-5p	G-CCNT1	TF-BHLHE40
miR-16-5p	G-CCNT1	TF-ELK4
miR-16-5p	G-CCNT1	TF-NFIC
miR-16-5p	G-CCNT1	TF-TP53
miR-16-5p	G-CCNT1	TF-MYC
G-CASC3	miR-182-5p	TF-CREB1
miR-128-3p	G-CASC3	TF-GATA6
miR-128-3p	G-CASC3	TF-HOXC6
miR-128-3p	G-CASC3	TF-KLF5
miR-128-3p	G-CASC3	TF-KLF4
miR-128-3p	G-CASC3	TF-SP1
miR-193b-3p	G-CASC3	TF-E2F1
miR-26b-5p	G-BRD4	TF-MXI1
G-BIRC5	miR-135b-5p	TF-MYC
G-BIRC5	miR-34a-5p	TF-KLF4
G-BIRC5	miR-34a-5p	TF-E2F1
G-BIRC5	miR-34a-5p	TF-YY1
G-BIRC5	miR-34a-5p	TF-MYC
miR-218-5p	G-BIRC5	TF-ARNT
miR-16-5p	G-BIRC5	TF-SP1
miR-16-5p	G-BIRC5	TF-MYC
miR-335-5p	G-BIRC5	TF-SREBF1
miR-335-5p	G-BIRC5	TF-SP4
miR-335-5p	G-BIRC5	TF-NANOG
miR-335-5p	G-BIRC5	TF-BCL6
miR-335-5p	G-BIRC5	TF-CDX2
miR-335-5p	G-BIRC5	TF-KLF4
miR-335-5p	G-BIRC5	TF-KDM5B
miR-335-5p	G-BIRC5	TF-SP1
miR-335-5p	G-BIRC5	TF-SPDEF
miR-335-5p	G-BIRC5	TF-MYC
miR-24-3p	G-AURKB	TF-MXI1
miR-24-3p	G-AURKB	TF-TP53
miR-24-3p	G-AURKB	TF-MYC
miR-148a-3p	G-AURKB	TF-MYC
let-7i-5p	G-AURKB	TF-KDM5B
let-7i-5p	G-AURKB	TF-MYC
let-7a-5p	G-AURKB	TF-SP1
let-7a-5p	G-AURKB	TF-MYC
let-7e-5p	G-AURKB	TF-MYC
miR-155-5p	G-AURKB	TF-ZNF384
miR-155-5p	G-AURKB	TF-TCF12
miR-155-5p	G-AURKB	TF-CEBPB
miR-155-5p	G-AURKB	TF-SPI1
miR-155-5p	G-AURKB	TF-ETS1
miR-155-5p	G-AURKB	TF-SP1
let-7b-5p	G-AURKB	TF-ELK4
let-7b-5p	G-AURKB	TF-SP1
let-7b-5p	G-AURKB	TF-MYC
miR-124-3p	G-AURKB	TF-SP3
miR-124-3p	G-AURKB	TF-MBD3
miR-124-3p	G-AURKB	TF-CEBPA
miR-124-3p	G-AURKB	TF-ELK3
miR-124-3p	G-AURKB	TF-EGR2
miR-124-3p	G-AURKB	TF-RARG
miR-124-3p	G-AURKB	TF-E2F4
miR-124-3p	G-AURKB	TF-STAT5A
miR-124-3p	G-AURKB	TF-RELA
miR-124-3p	G-AURKB	TF-SP1
miR-124-3p	G-AURKB	TF-EGR1
G-AURKB	miR-16-5p	TF-ELK4
G-AURKB	miR-16-5p	TF-TBP
G-AURKB	miR-16-5p	TF-SP1
G-AURKB	miR-16-5p	TF-TP53
G-AURKB	miR-16-5p	TF-MYC
miR-26b-5p	G-ATF3	TF-BATF
miR-26b-5p	G-ATF3	TF-GATA2
miR-24-3p	G-ARHGAP19	TF-E2F1
miR-24-3p	G-ARHGAP19	TF-CTCF
miR-24-3p	G-ARHGAP19	TF-MYC
G-ARHGAP19	let-7e-5p	TF-MYC
G-ARHGAP19	miR-193b-3p	TF-E2F1
miR-192-5p	G-ARHGAP19	TF-NFYA
miR-192-5p	G-ARHGAP19	TF-SP4
miR-192-5p	G-ARHGAP19	TF-FOS
miR-192-5p	G-ARHGAP19	TF-CTCF
miR-192-5p	G-ARHGAP19	TF-EGR1
G-APPBP2	miR-128-3p	TF-RUNX1
G-APPBP2	miR-128-3p	TF-KLF5
G-APPBP2	miR-128-3p	TF-KLF4
G-APPBP2	miR-128-3p	TF-SP1
miR-148a-3p	G-APPBP2	TF-MYC
G-APPBP2	miR-27a-3p	TF-SP3
G-APPBP2	miR-27a-3p	TF-RUNX1
G-APPBP2	miR-27a-3p	TF-SP1
G-APPBP2	miR-27a-3p	TF-TP53
G-APPBP2	miR-27b-3p	TF-RUNX1
G-APPBP2	miR-27b-3p	TF-CREB1
G-APPBP2	miR-27b-3p	TF-SP1
G-ADAM9	miR-362-3p	TF-ARNT
miR-362-3p	G-MTF1	TF-E2F1
miR-362-3p	G-MTF1	TF-ETS1
miR-19b-3p	G-SON	TF-GMEB2
miR-19b-3p	G-SON	TF-ATF2
miR-19b-3p	G-SON	TF-CREB1
miR-19b-3p	G-SON	TF-TP53
miR-19b-3p	G-FAM46C	TF-GMEB2
miR-19b-3p	G-FAM46C	TF-TP53
miR-19b-3p	G-CENPN	TF-SMAD4
miR-19b-3p	G-CENPN	TF-GMEB2
miR-19b-3p	G-CENPN	TF-ATF2
miR-19b-3p	G-CENPN	TF-CREB1
miR-19b-3p	G-CENPN	TF-TP53
miR-19b-3p	G-GIGYF1	TF-TP53
miR-17-5p	G-BTG2	TF-REST
miR-17-5p	G-BTG2	TF-ZNF12
miR-17-5p	G-BTG2	TF-MXI1
miR-17-5p	G-BTG2	TF-RUNX3
miR-17-5p	G-BTG2	TF-ZBTB7A
miR-17-5p	G-BTG2	TF-TP53
miR-17-5p	G-BTG2	TF-MYC
miR-17-5p	G-MMP2	TF-MYC
miR-17-5p	G-SEPT11	TF-SOX4
miR-17-5p	G-SEPT11	TF-MXI1
miR-17-5p	G-SEPT11	TF-RUNX3
miR-17-5p	G-SEPT11	TF-SMAD4
miR-17-5p	G-SEPT11	TF-STAT3
miR-17-5p	G-SEPT11	TF-ETV1
miR-17-5p	G-SEPT11	TF-E2F1
miR-17-5p	G-SEPT11	TF-TP53
miR-17-5p	G-SEPT11	TF-MYC
miR-17-5p	G-SNTB2	TF-RUNX1
miR-17-5p	G-SNTB2	TF-RUNX3
miR-17-5p	G-SNTB2	TF-ELK4
miR-17-5p	G-SNTB2	TF-E2F1
miR-17-5p	G-SNTB2	TF-MYC
miR-17-5p	G-CBX8	TF-SMAD4
miR-17-5p	G-CBX8	TF-ZBTB7A
miR-17-5p	G-CBX8	TF-E2F1
miR-17-5p	G-CBX8	TF-TP53
miR-17-5p	G-POLQ	TF-RUNX3
miR-17-5p	G-POLQ	TF-ELK4
miR-17-5p	G-POLQ	TF-STAT3
miR-17-5p	G-POLQ	TF-ETV1
miR-17-5p	G-POLQ	TF-MYC
miR-17-5p	G-MTF1	TF-HIF1A
miR-17-5p	G-MTF1	TF-RUNX3
miR-17-5p	G-MTF1	TF-ELK4
miR-17-5p	G-MTF1	TF-ETV1
miR-17-5p	G-MTF1	TF-ZBTB7A
miR-17-5p	G-MTF1	TF-E2F1
miR-17-5p	G-MTF1	TF-TP53
miR-17-5p	G-MTF1	TF-MYC
miR-17-5p	G-FAM46C	TF-STAT3
miR-17-5p	G-FAM46C	TF-ZBTB7A
miR-17-5p	G-FAM46C	TF-E2F1
miR-17-5p	G-FAM46C	TF-TP53
miR-17-5p	G-FAM46C	TF-MYC
miR-17-5p	G-ZFYVE26	TF-NFAT5
miR-17-5p	G-ZFYVE26	TF-STAT3
miR-17-5p	G-ZFYVE26	TF-ETV1
miR-17-5p	G-ZFYVE26	TF-ZBTB7A
miR-17-5p	G-ZFYVE26	TF-TP53
miR-17-5p	G-ZFYVE26	TF-MYC
miR-17-5p	G-STK11	TF-MYC
miR-17-5p	G-RBL1	TF-TCF4
miR-17-5p	G-RBL1	TF-ELK4
miR-17-5p	G-RBL1	TF-SMAD4
miR-17-5p	G-RBL1	TF-ETV1
miR-17-5p	G-RBL1	TF-ZBTB7A
miR-17-5p	G-RBL1	TF-E2F1
miR-17-5p	G-RBL1	TF-TP53
miR-17-5p	G-RBL1	TF-MYC
miR-17-5p	G-RAB22A	TF-ELK4
miR-17-5p	G-RAB22A	TF-SMAD4
miR-17-5p	G-RAB22A	TF-STAT3
miR-17-5p	G-RAB22A	TF-ETV1
miR-17-5p	G-RAB22A	TF-ZBTB7A
miR-17-5p	G-RAB22A	TF-TP53
miR-17-5p	G-RAB22A	TF-MYC
miR-17-5p	G-GIGYF1	TF-TCF3
miR-17-5p	G-GIGYF1	TF-TP53
miR-122-5p	G-RBBP5	TF-CREB1
miR-128-3p	G-RBBP5	TF-RUNX1
miR-128-3p	G-RBBP5	TF-KLF4
miR-27a-3p	G-RBBP5	TF-GATA3
miR-27a-3p	G-RBBP5	TF-RUNX1
miR-27b-3p	G-RBBP5	TF-RUNX1
miR-27b-3p	G-RBBP5	TF-CREB1
miR-193b-3p	G-RBBP5	TF-ESR1
miR-193b-3p	G-RBBP5	TF-ELK3
miR-193b-3p	G-RBBP5	TF-MAX
miR-193b-3p	G-RBBP5	TF-E2F1
miR-1-3p	G-RBBP5	TF-NR5A2
miR-1-3p	G-RBBP5	TF-GATA3
miR-1-3p	G-RBBP5	TF-UBTF
miR-302c-3p	G-SON	TF-ELK4
G-RAB22A	miR-302c-3p	TF-ELK4
miR-181a-5p	G-PTGS2	TF-TCF21
miR-181a-5p	G-PTGS2	TF-CEBPA
miR-181a-5p	G-PTGS2	TF-GATA6
miR-181a-5p	G-PTGS2	TF-SNAI2
miR-181a-5p	G-PTGS2	TF-ETS1
miR-128-3p	G-PTGS2	TF-RUNX1
miR-128-3p	G-PTGS2	TF-GATA6
miR-128-3p	G-PTGS2	TF-HOXC6
miR-128-3p	G-PTGS2	TF-SNAI2
miR-146a-5p	G-PTGS2	TF-SMAD4
miR-26a-5p	G-PTGS2	TF-MYC
let-7b-5p	G-PTGS2	TF-GATA6
let-7b-5p	G-PTGS2	TF-ELK4
let-7b-5p	G-PTGS2	TF-MYC
miR-124-3p	G-PTGS2	TF-CEBPA
miR-124-3p	G-PTGS2	TF-GATA6
miR-124-3p	G-PTGS2	TF-ELK3
miR-124-3p	G-PTGS2	TF-SNAI2
miR-124-3p	G-PTGS2	TF-RARG
miR-124-3p	G-PTGS2	TF-NFIC
miR-124-3p	G-PTGS2	TF-RELA
miR-16-5p	G-PTGS2	TF-ELK4
miR-16-5p	G-PTGS2	TF-NFIC
miR-16-5p	G-PTGS2	TF-TP53
miR-16-5p	G-PTGS2	TF-MYC
miR-335-5p	G-PTGS2	TF-EHF
miR-335-5p	G-PTGS2	TF-HOXC6
miR-335-5p	G-PTGS2	TF-RARG
miR-335-5p	G-PTGS2	TF-ZEB1
miR-335-5p	G-PTGS2	TF-CDX2
miR-335-5p	G-PTGS2	TF-KDM5B
miR-335-5p	G-PTGS2	TF-SPDEF
miR-335-5p	G-PTGS2	TF-MYC
miR-455-3p	G-SON	TF-MYC
G-HSPA1B	miR-455-3p	TF-MYC
miR-455-3p	G-RAB22A	TF-MYC
miR-122-5p	G-HMOX1	TF-CREB1
miR-128-3p	G-HMOX1	TF-KLF5
miR-128-3p	G-HMOX1	TF-KLF4
miR-24-3p	G-HMOX1	TF-E2F1
miR-24-3p	G-HMOX1	TF-CTCF
miR-24-3p	G-HMOX1	TF-MYC
miR-1-3p	G-HMOX1	TF-PPARG
miR-1-3p	G-HMOX1	TF-UBTF
miR-124-3p	G-HMOX1	TF-TFAP4
miR-124-3p	G-HMOX1	TF-CEBPA
miR-124-3p	G-HMOX1	TF-KLF4
miR-124-3p	G-HMOX1	TF-RELA
miR-16-5p	G-HMOX1	TF-TFAP4
miR-16-5p	G-HMOX1	TF-MYB
miR-16-5p	G-HMOX1	TF-BHLHE40
miR-16-5p	G-HMOX1	TF-TBP
miR-16-5p	G-HMOX1	TF-MYC
miR-26b-5p	G-HMOX1	TF-ATF3
miR-335-5p	G-HMOX1	TF-TFAP4
miR-335-5p	G-HMOX1	TF-EBF1
miR-335-5p	G-HMOX1	TF-USF2
miR-335-5p	G-HMOX1	TF-FOS
miR-335-5p	G-HMOX1	TF-BHLHE40
miR-335-5p	G-HMOX1	TF-MYOD1
miR-335-5p	G-HMOX1	TF-KLF4
miR-335-5p	G-HMOX1	TF-MYC
miR-30d-5p	G-KIF11	TF-MYBL2
miR-30d-5p	G-KIF11	TF-FOXA1
miR-30d-5p	G-KDM3A	TF-NFAT5
miR-30d-5p	G-KDM3A	TF-FOXA1
miR-30d-5p	G-KDM3A	TF-MYC
miR-615-3p	G-THRAP3	TF-PBX3
miR-30a-5p	G-FSCN1	TF-KLF9
miR-30a-5p	G-FSCN1	TF-TP53
miR-145-5p	G-FSCN1	TF-MYC
G-FSCN1	miR-133a-3p	TF-SP1
miR-93-5p	G-JUN	TF-JUN
miR-93-5p	G-JUN	TF-ZNF12
miR-93-5p	G-JUN	TF-ELK4
miR-93-5p	G-JUN	TF-SMAD4
miR-93-5p	G-JUN	TF-STAT3
miR-93-5p	G-JUN	TF-ZBTB7A
miR-93-5p	G-JUN	TF-E2F1
miR-93-5p	G-JUN	TF-MYC
G-BTG2	miR-93-5p	TF-REST
G-BTG2	miR-93-5p	TF-ZNF12
G-BTG2	miR-93-5p	TF-MXI1
G-BTG2	miR-93-5p	TF-RUNX3
G-BTG2	miR-93-5p	TF-IRF1
G-BTG2	miR-93-5p	TF-ZBTB7A
G-BTG2	miR-93-5p	TF-MYC
miR-93-5p	G-SON	TF-MXI1
miR-93-5p	G-SON	TF-ELK4
miR-93-5p	G-SON	TF-ZBTB7A
miR-93-5p	G-SON	TF-E2F1
miR-93-5p	G-SON	TF-YY1
miR-93-5p	G-SON	TF-MYC
miR-93-5p	G-MED13L	TF-ZBTB7A
miR-93-5p	G-MED13L	TF-E2F1
miR-93-5p	G-MED13L	TF-YY1
miR-93-5p	G-MED13L	TF-MYC
miR-93-5p	G-PHF10	TF-TCF4
miR-93-5p	G-PHF10	TF-MXI1
miR-93-5p	G-PHF10	TF-ZBTB7A
miR-93-5p	G-PHF10	TF-E2F1
miR-93-5p	G-PHF10	TF-MYC
miR-93-5p	G-SNTB2	TF-SP4
miR-93-5p	G-SNTB2	TF-RUNX3
miR-93-5p	G-SNTB2	TF-ELK4
miR-93-5p	G-SNTB2	TF-IRF1
miR-93-5p	G-SNTB2	TF-E2F1
miR-93-5p	G-SNTB2	TF-YY1
miR-93-5p	G-SNTB2	TF-MYC
miR-93-5p	G-CBX8	TF-SMAD4
miR-93-5p	G-CBX8	TF-ZBTB7A
miR-93-5p	G-CBX8	TF-E2F1
miR-93-5p	G-POLQ	TF-RUNX3
miR-93-5p	G-POLQ	TF-ELK4
miR-93-5p	G-POLQ	TF-STAT3
miR-93-5p	G-POLQ	TF-YY1
miR-93-5p	G-POLQ	TF-MYC
miR-93-5p	G-MTF1	TF-HIF1A
miR-93-5p	G-MTF1	TF-RUNX3
miR-93-5p	G-MTF1	TF-ELK4
miR-93-5p	G-MTF1	TF-ZBTB7A
miR-93-5p	G-MTF1	TF-E2F1
miR-93-5p	G-MTF1	TF-YY1
miR-93-5p	G-MTF1	TF-MYC
miR-93-5p	G-FAM46C	TF-SP4
miR-93-5p	G-FAM46C	TF-IRF1
[truncated: 306 more rows]

## Sheet: Table S8
Table S8. Number of shortest paths towards black module hub genes (across columns). For convenience, transcription factors and genes are prefixed with TF- and G-, respectively
	AGTR1	CASP4	CD38	Sum of shortest path	Average of shortest path
TF-MYC	3	3	1	7	2.3
TF-BCL6	3	3	1	7	2.3
TF-SPDEF	3	3	1	7	2.3
TF-RCOR1	3	1	3	7	2.3
TF-ATF2	3	3	1	7	2.3
TF-E2F6	1	3	3	7	2.3
TF-SMAD2	1	3	3	7	2.3
miR-124-3p	2	4	2	8	2.6
miR-98-5p	2	4	2	8	2.6
miR-15a-5p	4	2	2	8	2.6
miR-155-5p	2	2	4	8	2.6
let-7d-5p	2	4	2	8	2.6
let-7e-5p	2	4	2	8	2.6
let-7a-5p	2	4	2	8	2.6
let-7c-5p	2	4	2	8	2.6
let-7f-5p	2	4	2	8	2.6
let-7g-5p	2	4	2	8	2.6
let-7i-5p	2	4	2	8	2.6
let-7b-5p	2	4	2	8	2.6
miR-26a-5p	4	2	2	8	2.6
miR-145-5p	2	4	2	8	2.6
Note: TF-, transcription factor

## Sheet: Table S9
Table S9. Number of shortest paths towards green module hub genes (across columns). For convenience, transcription factors and genes are prefixed with TF- and G-, respectively
	CDCA3	CDT1	KIF11	KIF22	BRCA1	KIF15	ORC1	CDCA8	Sum of shortest path	Average of shortest path
TF-E2F1	3	1	1	1	1	1	3	3	14	1.75
TF-SP1	3	3	3	1	1	3	1	1	16	2
miR-124-3p	2	2	2	2	2	2	2	2	16	2
miR-24-3p	2	2	2	2	2	2	2	2	16	2
miR-193b-3p	2	2	2	2	2	2	2	2	16	2
miR-20b-5p	2	2	2	2	2	2	2	2	16	2
miR-17-5p	2	2	2	2	2	2	2	2	16	2
miR-93-5p	2	2	2	2	2	2	2	2	16	2
miR-20a-5p	2	2	2	2	2	2	2	2	16	2
miR-106b-5p	2	2	2	2	2	2	2	2	16	2
TF-NFIC	1	3	3	3	3	3	1	1	18	2.25
TF-EGR1	3	3	3	3	1	1	1	3	18	2.25
TF-SP4	1	3	3	3	1	3	1	3	18	2.25
TF-KLF9	3	3	1	3	3	1	1	3	18	2.25
TF-FOXA1	3	3	1	3	1	3	1	3	18	2.25
miR-21-5p	2	4	2	2	2	2	2	2	18	2.25
miR-335-5p	2	4	2	2	2	2	2	2	18	2.25
miR-34a-5p	2	2	2	2	2	2	4	2	18	2.25
miR-16-5p	2	4	2	2	2	2	2	2	18	2.25
miR-106a-5p	4	2	2	2	2	2	2	2	18	2.25
TF-MYC	1	3	3	3	1	3	3	3	20	2.5
TF-STAT3	3	3	3	3	1	3	1	3	20	2.5
TF-YY1	3	3	1	3	1	3	3	3	20	2.5
TF-CTCF	3	3	3	3	1	3	1	3	20	2.5
TF-TP53	3	3	1	3	3	3	3	1	20	2.5
TF-ETS1	3	3	3	1	1	3	3	3	20	2.5
TF-RCOR1	3	3	3	1	1	3	3	3	20	2.5
TF-ELK3	3	3	3	1	3	3	1	3	20	2.5
TF-E2F6	1	1	3	3	3	3	3	3	20	2.5
TF-BCLAF1	3	3	1	3	1	3	3	3	20	2.5
TF-MYB	3	3	3	3	3	1	3	1	20	2.5
TF-MXI1	1	3	3	3	1	3	3	3	20	2.5
TF-CEBPA	3	3	3	3	1	3	1	3	20	2.5
miR-130b-3p	4	2	2	2	2	2	2	4	20	2.5
miR-192-5p	2	4	2	4	2	2	2	2	20	2.5
miR-155-5p	2	4	4	2	2	2	2	2	20	2.5
let-7a-5p	2	2	4	2	2	4	2	2	20	2.5
let-7f-5p	2	2	4	2	2	4	2	2	20	2.5
let-7b-5p	2	2	4	2	2	4	2	2	20	2.5
miR-125a-5p	2	4	2	2	2	4	2	2	20	2.5

## Sheet: Table S10
Table S10. Number of shortest paths towards red module hub genes (across columns). For convenience, transcription factors and genes are prefixed with TF- and G-, respectively
	AURKB	BIRC5	NCAPH	NEK2	Sum of shortest path	Average of shortest path
TF-SP1	1	1	3	1	6	1.5
TF-MYC	1	1	3	3	8	2
TF-EGR1	1	3	1	3	8	2
TF-E2F1	3	1	1	3	8	2
TF-KLF4	3	1	3	1	8	2
TF-KDM5B	1	1	3	3	8	2
miR-124-3p	2	2	2	2	8	2
miR-34a-5p	2	2	2	2	8	2

[truncated: 1 more sheets: Table S11]
